# Supplementary material for: Chemogenomic profiling of Plasmodium falciparum as a tool to aid antimalarial drug discovery
Source: PubMed Central journal article supplement (PMC4635350; doi:10.1038/srep15930), 2015-11-06
Supplement: srep15930-s1.pdf [file srep15930-s1.pdf]

1 **Supplemental information for:**

2 **Title:** Chemogenomic profiling of *Plasmodium falciparum* as a tool to aid antimalarial drug  
3 discovery

4 **Authors:** Anupam Pradhan<sup>1</sup>, Geoffrey Siwo<sup>2†</sup>, Naresh Singh<sup>1</sup>, Brian Martens<sup>1</sup> Bharath Balu<sup>1\*</sup>,  
5 Katrina Button-Simons<sup>2</sup>, Asako Tan<sup>2</sup>, Min Zhang<sup>1</sup>, Kenneth O. Udenze<sup>1</sup>, Rays H.Y. Jiang<sup>1</sup>,  
6 Michael T. Ferdig<sup>2</sup>, John H. Adams<sup>1\*</sup> & Dennis E. Kyle<sup>1\*</sup>

7 <sup>1</sup>Department of Global Health, College of Public Health, University of South Florida,  
8 Tampa, FL 33612.

9 <sup>2</sup>Eck Institute for Global Health, Department of Biological Sciences, University of Notre  
10 Dame, IN 46556

11 \*Corresponding authors: [dkyle@health.usf.edu](mailto:dkyle@health.usf.edu) or [jadams3@health.usf.edu](mailto:jadams3@health.usf.edu).

12

13

14

**Figure S1.**

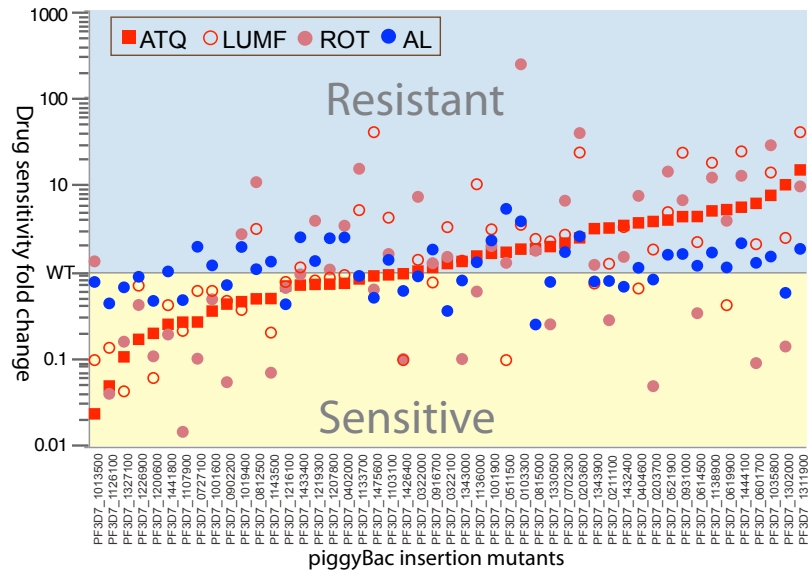

**Figure S1: Inhibitors with diverse scaffolds targeting at different levels of the mitochondrial electron transport chain.** A rank scatter plot of IC<sub>50</sub> values of pB mutants towards LUMF, ATQ, and ROT. The drug response of LUMF appears to be close to ATQ and ROT rather than that of ARTL, which is more or less a straight line pattern. A correlation coefficient of 1000 permutations between the drug pair ATQ-LUMF was observed 0.64, which is greater than observed with AL-LUMF which is 0.36 (p-value <0.001).

Figure S2

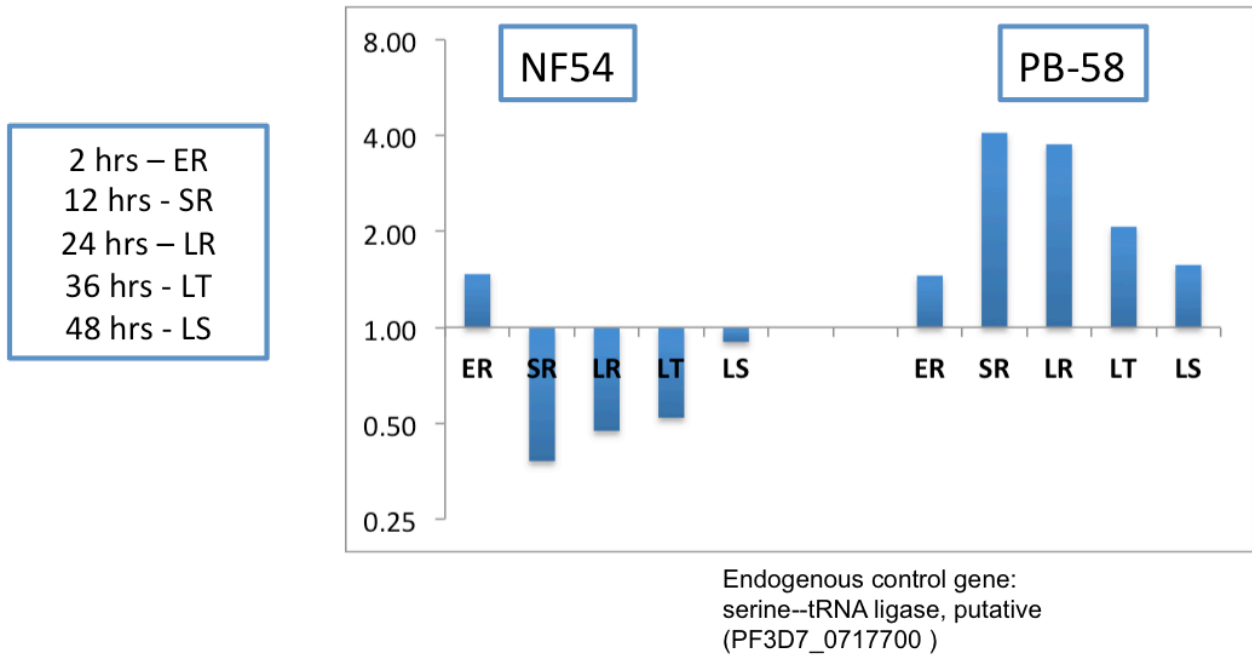

**Figure S2: qRT-PCR.** Quantitative analysis of the expression profile of the K13 propeller gene in WT NF54 and PB58, which carries a *piggyBac* insertion in the putative promoter region of the gene. The profiles are normalized against the constitutive-expressed gene PF3D7\_071770. Although the K13 mutant does have slower growth than NF54, overall growth did not correlate with IC50 for most drugs (Pearson's  $r < 0.1$ ).

Table S1. List of *P. falciparum* piggyBac mutant clones

| PB clone# | geneID        | old ID      | annotation                                       | GO functional pathway                                             |
|-----------|---------------|-------------|--------------------------------------------------|-------------------------------------------------------------------|
| 1         | PF3D7_0811300 | MAL8P1.104  | CAF1 family ribonuclease                         | Membrane/Structural proteins, trafficking and signal transduction |
| 2         | PF3D7_1305500 | PF13_0027   | Protein phosphatase, putative                    | Biochemical pathways/protein metabolism/protein modification      |
| 3         | PF3D7_0615900 | PFF0770c    | Conserved Plasmodium protein                     | Biochemical pathways/protein metabolism/protein modification      |
| 4         | PF3D7_1122900 | PF11_0240   | Dynein heavy chain                               | Membrane/Structural proteins, trafficking and signal transduction |
| 5         | PF3D7_1141900 | PF11_0431   | inner membrane complex protein 1b, putative      | Membrane/Structural proteins, trafficking and signal transduction |
| 6         | PF3D7_1475600 | PFF0675c    | Bromodomain protein, putative                    | Protein binding                                                   |
| 7         | PF3D7_0211100 | PFB0495w    | Conserved Plasmodium protein                     | Membrane/Structural proteins, trafficking and signal transduction |
| 8         | PF3D7_0203000 | PFB0145c    | Kid domain containg protein                      | Biochemical pathways/protein metabolism/protein modification      |
| 9         | PF3D7_0404600 | PFD0225w    | Conserved Plasmodium membrane protein            | Conserved proteins with unknown function                          |
| 11        | PF3D7_0416500 | PF10_0178   | Conserved Plasmodium protein                     | Conserved proteins with unknown function                          |
| 12        | PF3D7_1018400 | PFD0200c    | conserved Plasmodium protein                     | Conserved proteins with unknown function                          |
| 13        | PF3D7_1360200 | MAL13P1.299 | Conserved protein                                | Conserved proteins with unknown function                          |
| 14        | PF3D7_0511500 | PFE0570w    | RNA pseudouridylate                              | Biochemical pathways/protein metabolism/protein modification      |
| 15        | PF3D7_0611800 | PFF0575c    | Conserved Plasmodium protein                     | Conserved proteins with unknown function                          |
| 16        | PF3D7_0619900 | PFF0970w    | Splicing factor 3a subunit                       | Nucleic acid metabolism/Nucleic acid binding/Transcription        |
| 17        | PF3D7_0521900 | MAL5P1.219  | conserved Plasmodium protein, unknown function   | conserved Plasmodium protein, unknown function                    |
| 18        | PF3D7_1219300 | PFL0935c    | Erythrocyte membrane protein 1, PFEMP1           | Exported proteins                                                 |
| 19        | PF3D7_1133700 | PF11_0347   | Conserved Plasmodium protein                     | Nucleic acid metabolism/Nucleic acid binding/Transcription        |
| 20        | PF3D7_0808700 | PF08_0106   | Erythrocyte membrane protein 1, PFEMP1           | Exported proteins                                                 |
| 21        | PF3D7_1136000 | PF11_0371   | Conserved Plasmodium protein                     | Conserved proteins with unknown function                          |
| 22        | PF3D7_0931000 | PF11_0505c  | Elongation factor Tu family protein-related      | Biochemical pathways/protein metabolism/protein modification      |
| 23        | PF3D7_0830900 | PF08_0001   | Plasmodium exported protein                      | Conserved proteins with unknown function                          |
| 24        | PF3D7_1231800 | PFL1530w    | Asparagine-rich protein                          | Conserved proteins with unknown function                          |
| 25        | PF3D7_1035800 | PF10_0350   | Probable protein                                 | Conserved proteins with unknown function                          |
| 26        | PF3D7_1444100 | PF14_0419   | Conserved Plasmodium protein                     | Biochemical pathways/protein metabolism/protein modification      |
| 28        | PF3D7_1138900 | PF11TR005   | Non Protein Coding, unspecified product          | Non Protein Coding, unspecified product                           |
| 29        | PF3D7_1441800 | PF14_0397   | SNF7 family protein                              | Membrane/Structural proteins, trafficking and signal transduction |
| 30        | PF3D7_1345800 | PF13_0243   | Conserved Plasmodium protein                     | Conserved proteins with unknown function                          |
| 31        | PF3D7_1432400 | PF14_0305   | Leucine-rich repeat protein 5                    | alpha-2 macroglobulin receptor-associated protein activity        |
| 32        | PF3D7_0819800 | MAL8P1.60   | conserved Plasmodium protein                     | Conserved proteins with unknown function                          |
| 33        | PF3D7_1207800 | PFL0390c    | Conserved Plasmodium protein                     | Conserved proteins with unknown function                          |
| 34        | PF3D7_1143500 | PF11_0448   | Conserved Plasmodium protein                     | Conserved proteins with unknown function                          |
| 35        | PF3D7_1001600 | PF10_0020   | Alpha/beta hydrolase                             | Biochemical pathways/protein metabolism/protein modification      |
| 36        | PF3D7_1019400 | PF10_0187   | 60S ribosomal protein L30e                       | Biochemical pathways/protein metabolism/protein modification      |
| 37        | PF3D7_1311900 | PF13_0065   | Vacuolar ATP synthase, catalytic subunit a       | Biochemical pathways/protein metabolism/protein modification      |
| 38        | PF3D7_1035700 | PF10_0348   | Erythrocyte membrane protein                     | Exported proteins                                                 |
| 39        | PF3D7_1103100 | PF11_0043   | 60S ribosomal protein P1                         | Biochemical pathways/protein metabolism/protein modification      |
| 42        | PF3D7_1216100 | PFL0775w    | Conserved Plasmodium protein                     | Conserved proteins with unknown function                          |
| 43        | PF3D7_0206100 | PFB0270w    | Iron-sulfur assembly protein                     | Biochemical pathways/protein metabolism/protein modification      |
| 44        | PF3D7_1352500 | PF13_0272   | Thioredoxin-related protein                      | Biochemical pathways/protein metabolism/protein modification      |
| 45        | PF3D7_1226900 | PFL1300c    | Conserved Plasmodium protein                     | Conserved proteins with unknown function                          |
| 46        | PF3D7_1368800 | MAL13P1.346 | DNA repair endonuclease                          | Nucleic acid metabolism/Nucleic acid binding/Transcription        |
| 47        | PF3D7_1432400 | PF14_0305   | Leucine-rich repeat protein 5                    | nuclear mRNA export factor, TAP homolog, putative                 |
| 48        | PF3D7_1343900 | MAL13P1.385 | RNA binding protein                              | Nucleic acid metabolism/Nucleic acid binding/Transcription        |
| 49        | PF3D7_1328800 | PF13_0152   | transcriptional regulatory protein sir2a (SIR2A) | Nucleic acid metabolism/Nucleic acid binding/Transcription        |

Table S1. List of *P. falciparum* piggyBac mutant clones

|    |               |             |                                                  |                                                                   |
|----|---------------|-------------|--------------------------------------------------|-------------------------------------------------------------------|
| 50 | PF3D7_1138700 | PF11_0398   | Conserved Plasmodium protein                     | Conserved proteins with unknown function                          |
| 51 | PF3D7_1327100 | MAL13P1.154 | Conserved Plasmodium protein                     | Conserved proteins with unknown function                          |
| 52 | PF3D7_1136600 | PF11_0378   | Conserved Plasmodium protein                     | Conserved proteins with unknown function                          |
| 54 | PF3D7_0902200 | PFI0105c    | Serine/Threonine protein kinase, FIKK family     | Biochemical pathways/protein metabolism/protein modification      |
| 55 | PF3D7_0727100 | MAL7P1.149  | Conserved Plasmodium protein                     | Conserved proteins with unknown function                          |
| 56 | PF3D7_0105500 | PFA0270c    | Conserved Plasmodium protein                     | Conserved proteins with unknown function                          |
| 57 | PF3D7_1126100 | PF11_0271   | ThiF family protein                              | Biochemical pathways/protein metabolism/protein modification      |
| 58 | PF3D7_1343700 | PF13_0238   | Kelch protein                                    | Membrane/Structural proteins, trafficking and signal transduction |
| 60 | PF3D7_1330500 | PF13_0164   | Conserved Plasmodium protein                     | Conserved proteins with unknown function                          |
| 61 | PF3D7_1343000 | MAL13P1.214 | Phosphoethanolamine N-methyltransferase          | Biochemical pathways/protein metabolism/protein modification      |
| 62 | PF3D7_1302000 | PF13_0076   | Plasmodium exported protein                      | Conserved proteins with unknown function                          |
| 64 | PF3D7_1107900 | PF11_0092   | Mechanosensitive ion channel protein             | Membrane/Structural proteins, trafficking and signal transduction |
| 65 | PF3D7_0606000 | PFF0295c    | Conserved Plasmodium protein                     | Conserved proteins with unknown function                          |
| 66 | PF3D7_0614500 | PFF0700c    | 60S ribosomal protein L19                        | Biochemical pathways/protein metabolism/protein modification      |
| 67 | PF3D7_0203700 | PFB0175c    | Nucleolar preribosomal assembly protein          | Biochemical pathways/protein metabolism/protein modification      |
| 68 | PF3D7_0601700 | PFF0085w    | Plasmodium exported protein (PHISTa), pseudogene | Exported proteins                                                 |
| 71 | PF3D7_1001900 | PF10_0023   | Plasmodium exported protein (hyp16)              | Exported proteins                                                 |
| 72 | PF3D7_1409500 | PF14_0093   | Conserved Plasmodium protein                     | Conserved proteins with unknown function                          |
| 73 | PF3D7_0916700 | PFI0820c    | RNA binding protein                              | Nucleic acid metabolism/Nucleic acid binding/Transcription        |
| 74 | PF3D7_0402000 | PFD0090c    | Plasmodium exported protein (PHISTa)             | Exported proteins                                                 |
| 75 | PF3D7_0102600 | PFA0130c    | Serine/Threonine protein kinase, FIKK family     | Biochemical pathways/protein metabolism/protein modification      |
| 76 | PF3D7_1433400 | PF14_0315   | Conserved Plasmodium membrane protein            | Biochemical pathways/protein metabolism/protein modification      |
| 77 | PF3D7_0322000 | PFC0975c    | Peptidyl-prolyl cis-trans isomerase              | Biochemical pathways/protein metabolism/protein modification      |
| 78 | PF3D7_0623900 | PFF1150w    | Ribonuclease HII                                 | Nucleic acid metabolism/Nucleic acid binding/Transcription        |
| 80 | PF3D7_1013500 | PF10_0132   | Phosphoinositide specific phospholipase C        | Membrane/Structural proteins, trafficking and signal transduction |
| 87 | PF3D7_0812500 | PF08_0086   | RNA binding protein                              | Biochemical pathways/protein metabolism/protein modification      |

**Table S2: Inhibitors and target Metabolic Pathways in *Plasmodium* (an asterisk “\*” identifies antimalarial drug)**

| <b>Metabolic Pathway</b>           | <b>Target Site</b>                                                                                                                     | <b>Drug (E.C. Targets)</b>                                            | <b>Start concentration in growth assays (μM)</b> |
|------------------------------------|----------------------------------------------------------------------------------------------------------------------------------------|-----------------------------------------------------------------------|--------------------------------------------------|
| Pyrimidine                         | Mitochondrial E-Transport                                                                                                              | *Atovaquone (1.10.2.2) (1)                                            | 1.9                                              |
| Purine                             | Adenosine deaminase(Adenosine to Inosine)                                                                                              | (erythro-9-(2-hydroxy-3-nonyl)adenine) (3.5.4.4) (2)                  | 1061.67                                          |
|                                    | IMP dehydrogenase(IMP to XMP) inhibits the synthesis of guanosine monophosphate from inosine monophosphate by parasitized erythrocytes | Bredinin (Mizoribine) (1.1.1.205)(3)                                  | 257.33                                           |
|                                    | Hypoxanthine-guanine phosphoribosyltransferase (HXP to IMP)                                                                            | Allopurinol (2.4.2.8)(4)                                              | 2448.33                                          |
| Folate                             | Dihydrofolate synthase (Dihydropteroate to Folate)                                                                                     | Pyrimethamine (1.5.1.3)(5)                                            | 16.76                                            |
|                                    | Dihydrofolate synthase (Dihydropteroate to Folate)                                                                                     | Methotrexate (1.5.1.3)(6, 7)                                          | 9.17                                             |
|                                    | Dihydrofolate synthase (Dihydropteroate to Folate)                                                                                     | Cycloguanil (1.5.1.3)(5)                                              | 14.37                                            |
|                                    |                                                                                                                                        | Sulfadoxine                                                           | 5.37                                             |
| Fatty Acid Synthesis in Apicoplast | Blocks the synthesis of dihydrofolic acid by inhibiting the enzyme dihydropteroate synthase                                            | Sulfadiazine (2.5.1.15)(8)                                            | 3330                                             |
|                                    | Acetyl-CoA Carboxylase (Acetyl-CoA to Malonyl-CoA)                                                                                     | Fenoxaprop (6.4.1.2) or [2-(2,4,5-trichlorophenoxy)propionic acid](9) | 1236.67                                          |
|                                    | Acetyl-CoA Carboxylase (Acetyl-CoA to Malonyl-CoA)                                                                                     | 5-(Tetradecyloxy)-2-furoic acid (6.4.1.2)(9)                          | 205.33                                           |
|                                    | Oxoacyl-ACP Synthase (Acetyl-CoA to Acetyl ACP)                                                                                        | Thiolactomycin (2.3.1.85, 2.3.1.41 )(10, 11)                          | 475.7                                            |
|                                    | Oxoacyl-ACP Synthase or fatty-acid synthase (Acetyl ACP to Oxoacyl-ACP)                                                                | Cerulenin (2.3.1.41, 2.3.1.85)(10, 11)                                | 149.33                                           |
|                                    | Enoyl-ACP reductase (Enoyl-acyl-ACP to Acyl-ACP)                                                                                       | Triclosan (Irgasan) (1.3.1.9)(12)                                     | 1151.67                                          |

| <b>Metabolic Pathway</b>  | <b>Target Site</b>                                                                                                  | <b>Drug (E.C. Targets)</b>                                                                   | <b>Start concentration in growth assays</b> |
|---------------------------|---------------------------------------------------------------------------------------------------------------------|----------------------------------------------------------------------------------------------|---------------------------------------------|
| Shikimate Biosynthesis    | Phosphoshikimate-1-carboxyvinyltransferase and Enolpyruvylshikimate-3-phosphate synthase (PEP)                      | Glyphosate (2.5.1.19)( <b>13</b> )                                                           | 4928.33                                     |
|                           | Aminodeoxy-chorismate lyase (Glutamate metabolism and Chorismate to 4-amino-4-deoxychorismate)                      | 6-Diazo-5-oxo-D-norleucine (6.3.5.8) ( <b>14, 15</b> )                                       | 195.0                                       |
| Spingomyelin and Ceremide | Serine C-palmitoyltransferase (Serine or Palmitoyl-Co-A to 3-dehydrosphinganine)                                    | Myriocin (2.3.1.50) ( <b>16</b> )                                                            | 166.0                                       |
|                           | Serine C-palmitoyltransferase (Serine or Palmitoyl-Co-A to 3-dehydrosphinganine)                                    | D-cycloserine (2.3.1.50) ( <b>16</b> )                                                       | 8163.33                                     |
|                           | Spingosine N-acyltransferase (Sphinganine to Dihydroceramide)                                                       | Fumonisin (B1) (2.3.1.24) ( <b>16</b> )                                                      | 233.33                                      |
|                           | Spingosine N-acyltransferase (Sphinganine to Dihydroceramide)                                                       | Fumonisin (B2) (2.3.1.24) ( <b>16</b> )                                                      | 233.33                                      |
|                           | Sphingomyelin phosphodiesterase (Sphingomyelin to Ceremide)                                                         | N- Butyldeoxynojirimycin (3.1.4.12) ( <b>17</b> )                                            |                                             |
|                           | Ceremide cholinphosphotransferase and Ceremide glucosyltransferase (Ceremide to sphingomyelin and Glucosylceremide) | D,L-erythro-1-Phenyl-2-hexadecanoylamino-3-morpholino-1-propanol•HCl (2.7.8.3) ( <b>18</b> ) | 326.0                                       |
|                           | Ceremide cholinphosphotransferase and Ceremide glucosyltransferase (Ceremide to sphingomyelin and Glucosylceremide) | D-threo-1-Phenyl-2-hexadecanoylamino-3-morpholino-1-propanol•HCl (2.4.1.80) ( <b>18</b> )    | 651.67                                      |

| <b>Metabolic Pathway</b>                                       | <b>Target Site</b>                                                                            | <b>Drug (E.C. Targets)</b>                                                                                                                | <b>Start concentration in growth assays</b> |
|----------------------------------------------------------------|-----------------------------------------------------------------------------------------------|-------------------------------------------------------------------------------------------------------------------------------------------|---------------------------------------------|
| Hemoglobin Digestion and ferriprotoporphyrin IX polymerization | Phospholipase A2<br>(Reversible inhibitor of calcium-dependent phospholipase A2)              | Palmityl trifluoromethyl ketone <b>(19)</b>                                                                                               | 540.33                                      |
|                                                                | Hemozoin Polymerization                                                                       | Chloroquine <b>(20-22)</b> , primaquine <b>(23, 24)</b> , mefloquine <b>(24)</b> , amodiaquine <b>(25, 26)</b> , piperazine <b>(22)</b> . | 16.2, 73.3, 2.2, 1.8, 0.8                   |
|                                                                | Cysteine proteases inhibitor                                                                  | E-64 (3.4.22.-) <b>(27)</b>                                                                                                               | 93.33                                       |
|                                                                | Aspartic acid proteases inhibitor                                                             | Pepstatin A (3.4.23.38) <b>(28)</b>                                                                                                       | 48.67                                       |
| Methionine and Polyamine                                       | Adenosylhomocysteinease (S-adenosylhomocysteinease to Adenosine)                              | Sinefungin (3.4.23.39) <b>(29)</b>                                                                                                        | 174.67                                      |
|                                                                | Adenosylhomocysteinease (S-adenosylhomocysteinease to Adenosine)                              | 2-Fluoroadenosine (3.3.1.1, 2.4.2.1) <b>(30, 31)</b>                                                                                      | 233.67                                      |
|                                                                | DOXP to Isopentyl-PP (DOXP reductoisomerase) Inhibits farnesyl diphosphate synthase           | Ibandronate (1.1.1.267) <b>(32)</b>                                                                                                       | 977.0                                       |
| Merozoite Invasion                                             | Actin Polymerization                                                                          | Cytochalasin D <b>(33)</b>                                                                                                                | 3.28                                        |
|                                                                | Interacts with Tubulin                                                                        | Benzimidazole <b>(34)</b>                                                                                                                 | 14108.33                                    |
|                                                                | Interacts with Tubulin                                                                        | 2,4-Dinitroaniline <b>(35)</b>                                                                                                            | 9101.67                                     |
| Mitochondrial Electron Transport Chain                         | Glycerol 3-Phosphate dehydrogenase (Interferes in Glycolysis esp. Glycerone-P to Glycerol-3P) | 1,10-Phenanthroline (1.1.1.8) <b>(36)</b>                                                                                                 | 925.0                                       |
|                                                                | Glycerol 3-Phosphate dehydrogenase (Interferes in Glycolysis esp. Glycerone-P to Glycerol-3P) | Rotenone (1.1.1.8) <b>(37)</b>                                                                                                            | 845.0                                       |
|                                                                | Glycerol 3-Phosphate dehydrogenase (Interferes in Glycolysis esp. Glycerone-P to Glycerol-3P) | Amytal (1.1.1.8) or amobarbital sodium <b>(38)</b>                                                                                        | 133.67                                      |
|                                                                | Interacts with the iron-sulphur centre of the succinate dehydrogenase (Succinate to Fumerate) | 2-Thenoyltrifluoroacetone (1.3.99.1) (39) <b>(40)</b>                                                                                     | 1500.33                                     |
|                                                                | Interacts with the bc1 complex of the respiratory chain                                       | Atovaquone (1.10.2.2) <b>(1)</b>                                                                                                          | 2.28                                        |



| Metabolic Pathway                                 | Target Site                                                                                                                                                                                                                                                 | Drug (E.C. Targets)                                                                               | Start concentration in growth assays |
|---------------------------------------------------|-------------------------------------------------------------------------------------------------------------------------------------------------------------------------------------------------------------------------------------------------------------|---------------------------------------------------------------------------------------------------|--------------------------------------|
| Transcription Regulation Inhibitors/HATs or HDACs | Histone deacetylases (HDACs)                                                                                                                                                                                                                                | Trichostatin A ( <b>41, 42</b> )                                                                  | 2.51                                 |
|                                                   | Histone acetyltransferases (HATs) (p300/CREB-binding Protein-specific Inhibitor of Acetyltransferase, Represses the Acetylation of Histone/Nonhistone Proteins and Histone Acetyltransferase-dependent Chromatin Transcription).                            | Curcumin ( <b>43</b> )                                                                            | 2262.67                              |
| DNA/RNA synthesis                                 | Substrate for Pgp, MRP-1 and BCRP. Sequestered into lysosomes according to a pH partitioning type mechanism. Strong inhibitor of DNA and RNA synthesis.                                                                                                     | Daunorubicin ( <b>44</b> )                                                                        | 59.33                                |
| Cell Signaling                                    | The CsA-cyclophilin or FK-506-FKBP complex regulates the activities of calcium dependent PP2B (serine/threonine phosphatase)                                                                                                                                | Cyclosporin A ( <b>45, 46</b> )                                                                   | 138.33                               |
|                                                   |                                                                                                                                                                                                                                                             | FK-506 ( <b>47, 48</b> )                                                                          | 202.67                               |
| Protein synthesis                                 | Binds reversibly to 50S ribosomal subunit causing blockade of transpeptidation/translocation reactions, inhibition of protein synthesis and thus inhibition of cell growth.                                                                                 | Cis-mirincamycin, trans-mirincamycin ( <b>49-51</b> )                                             | 1.8, 1.8                             |
| Endoperoxides                                     | Likely mode of action is ion-dependent alkylation (principally by Fe <sup>++</sup> ), and the sarcoplasmic endoplasmic reticulum calcium adenosine triphosphatase (PfATPase 6) has been proposed as the primary target.                                     | Artesunate, artelinic acid, artemether, artemisinin (qinghaosu), dihydroartemisinin ( <b>52</b> ) | 6.5, 4.0, 2.8, 3.0, 2.9              |
| Membrane transporters/efflux pumps                | Verapamil block voltage-dependent calcium channels. Also known as resistance reversal agents in <i>Plasmodium</i> . Desipramine electively blocks reuptake of norepinephrine (noradrenaline) from the neuronal synapse. It also inhibits serotonin reuptake | Verapamil ( <b>53, 54</b> ) and Desipramine ( <b>55, 56</b> )                                     | 3.7, 6.3                             |
| Unknowns                                          | Might interfere with the fatty acid metabolism of the parasite                                                                                                                                                                                              | Lumifantrine ( <b>57</b> )                                                                        | 1.6                                  |

\*An asterisk identified drugs and compounds for which the MOA has been established in *Plasmodium*.

## References:

1. Fry M & Pudney M (1992) Site of action of the antimalarial hydroxynaphthoquinone, 2-[trans-4-(4'-chlorophenyl)cyclohexyl]-3-hydroxy-1,4-naphthoquinone (566C80). *Biochemical pharmacology* 43(7):1545-1553.
2. Tyler PC, Taylor EA, Frohlich RF, & Schramm VL (2007) Synthesis of 5'-methylthio coformycins: specific inhibitors for malarial adenosine deaminase. *J Am Chem Soc* 129(21):6872-6879.
3. Webster HK & Whaun JM (1982) Antimalarial properties of bredinin. Prediction based on identification of differences in human host-parasite purine metabolism. *J Clin Invest* 70(2):461-469.
4. Dawson PA, Cochran DA, Emmerson BT, & Gordon RB (1993) Inhibition of Plasmodium falciparum hypoxanthine-guanine phosphoribosyltransferase mRNA by antisense oligodeoxynucleotide sequence. *Mol Biochem Parasitol* 60(1):153-156.
5. Sixsmith DG, Watkins WM, Chulay JD, & Spencer HC (1984) In vitro antimalarial activity of tetrahydrofolate dehydrogenase inhibitors. *Am J Trop Med Hyg* 33(5):772-776.
6. Galivan J, Inglese J, McGuire JJ, Nimec Z, & Coward JK (1985) gamma-Fluoromethotrexate: synthesis and biological activity of a potent inhibitor of dihydrofolate reductase with greatly diminished ability to form poly-gamma-glutamates. *Proceedings of the National Academy of Sciences of the United States of America* 82(9):2598-2602.
7. Barnes MJ, et al. (1999) Impact of polyglutamation on sensitivity to raltitrexed and methotrexate in relation to drug-induced inhibition of de novo thymidylate and purine biosynthesis in CCRF-CEM cell lines. *Clin Cancer Res* 5(9):2548-2558.
8. Triglia T & Cowman AF (1994) Primary structure and expression of the dihydropteroate synthetase gene of Plasmodium falciparum. *Proceedings of the National Academy of Sciences of the United States of America* 91(15):7149-7153.
9. Gornicki P (2003) Apicoplast fatty acid biosynthesis as a target for medical intervention in apicomplexan parasites. *Int J Parasitol* 33(9):885-896.
10. Jones SM, et al. (2005) Analogues of thiolactomycin as potential antimalarial agents. *J Med Chem* 48(19):5932-5941.
11. Lack G, Homberger-Zizzari E, Folkers G, Scapozza L, & Perozzo R (2006) Recombinant expression and biochemical characterization of the unique elongating beta-ketoacyl-acyl carrier protein synthase involved in fatty acid biosynthesis of Plasmodium falciparum using natural and artificial substrates. *J Biol Chem* 281(14):9538-9546.
12. Tasdemir D, et al. (2005) Anti-protozoal and plasmodial FabI enzyme inhibiting metabolites of Scrophularia lepidota roots. *Phytochemistry* 66(3):355-362.
13. Schonbrunn E, et al. (2001) Interaction of the herbicide glyphosate with its target enzyme 5-enolpyruvylshikimate 3-phosphate synthase in atomic detail. *Proceedings of the National Academy of Sciences of the United States of America* 98(4):1376-1380.
14. Coggin JH, Jr. & Martin WR (1965) 6-Diazo-5-Oxo-L-Norleucine Inhibition of Escherichia Coli. *J Bacteriol* 89:1348-1353.

15. Huber KR, Mayer EP, Mitchell DF, & Roberts J (1987) Cell cycle phase perturbations by 6-diazo-5-oxo-L-norleucine and acivicin in normal and neoplastic human cell lines. *Br J Cancer* 55(6):653-656.
16. Gerold P & Schwarz RT (2001) Biosynthesis of glycosphingolipids de-novo by the human malaria parasite *Plasmodium falciparum*. *Mol Biochem Parasitol* 112(1):29-37.
17. Platt FM, Neises GR, Karlsson GB, Dwek RA, & Butters TD (1994) N-butyldeoxygalactonojirimycin inhibits glycolipid biosynthesis but does not affect N-linked oligosaccharide processing. *J Biol Chem* 269(43):27108-27114.
18. Lauer SA, Ghorri N, & Haldar K (1995) Sphingolipid synthesis as a target for chemotherapy against malaria parasites. *Proceedings of the National Academy of Sciences of the United States of America* 92(20):9181-9185.
19. Ackermann EJ, Conde-Frieboes K, & Dennis EA (1995) Inhibition of macrophage Ca(2+)-independent phospholipase A2 by bromoenol lactone and trifluoromethyl ketones. *J Biol Chem* 270(1):445-450.
20. Homewood CA, Warhurst DC, Peters W, & Baggaley VC (1972) Lysosomes, pH and the anti-malarial action of chloroquine. *Nature* 235(5332):50-52.
21. Krogstad DJ & Schlesinger PH (1986) A perspective on antimalarial action: effects of weak bases on *Plasmodium falciparum*. *Biochemical pharmacology* 35(4):547-552.
22. Warhurst DC, *et al.* (2007) Activity of piperazine and other 4-aminoquinoline antiplasmodial drugs against chloroquine-sensitive and resistant blood-stages of *Plasmodium falciparum*. Role of beta-haematin inhibition and drug concentration in vacuolar water- and lipid-phases. *Biochemical pharmacology* 73(12):1910-1926.
23. Basilico N, Pagani E, Monti D, Olliaro P, & Taramelli D (1998) A microtitre-based method for measuring the haem polymerization inhibitory activity (HPIA) of antimalarial drugs. *J Antimicrob Chemother* 42(1):55-60.
24. Vennerstrom JL, *et al.* (1999) 8-Aminoquinolines active against blood stage *Plasmodium falciparum* in vitro inhibit hematin polymerization. *Antimicrob Agents Chemother* 43(3):598-602.
25. Bray PG, Hawley SR, & Ward SA (1996) 4-Aminoquinoline resistance of *Plasmodium falciparum*: insights from the study of amodiaquine uptake. *Mol Pharmacol* 50(6):1551-1558.
26. Hawley SR, Bray PG, O'Neill PM, Park BK, & Ward SA (1996) The role of drug accumulation in 4-aminoquinoline antimalarial potency. The influence of structural substitution and physicochemical properties. *Biochemical pharmacology* 52(5):723-733.
27. Bailly E, Jambou R, Savel J, & Jaureguiberry G (1992) *Plasmodium falciparum*: differential sensitivity in vitro to E-64 (cysteine protease inhibitor) and Pepstatin A (aspartyl protease inhibitor). *J Protozool* 39(5):593-599.
28. Moura PA, Dame JB, & Fidock DA (2009) Role of *Plasmodium falciparum* digestive vacuole plasmepsins in the specificity and antimalarial mode of action of cysteine and aspartic protease inhibitors. *Antimicrob Agents Chemother* 53(12):4968-4978.

29. Trager W, Tershakovec M, Chiang PK, & Cantoni GL (1980) Plasmodium falciparum: antimalarial activity in culture of sinefungin and other methylation inhibitors. *Exp Parasitol* 50(1):83-89.
30. Reddy MC, *et al.* (2008) Crystal structures of Mycobacterium tuberculosis S-adenosyl-L-homocysteine hydrolase in ternary complex with substrate and inhibitors. *Protein Sci* 17(12):2134-2144.
31. Chaudhary K, Ting LM, Kim K, & Roos DS (2006) Toxoplasma gondii purine nucleoside phosphorylase biochemical characterization, inhibitor profiles, and comparison with the Plasmodium falciparum ortholog. *J Biol Chem* 281(35):25652-25658.
32. Kuntz L, *et al.* (2005) Isoprenoid biosynthesis as a target for antibacterial and antiparasitic drugs: phosphonohydroxamic acids as inhibitors of deoxyxylulose phosphate reducto-isomerase. *Biochem J* 386(Pt 1):127-135.
33. Sampath P & Pollard TD (1991) Effects of cytochalasin, phalloidin, and pH on the elongation of actin filaments. *Biochemistry* 30(7):1973-1980.
34. Skinner-Adams TS, Davis TM, Manning LS, & Johnston WA (1997) The efficacy of benzimidazole drugs against Plasmodium falciparum in vitro. *Trans R Soc Trop Med Hyg* 91(5):580-584.
35. Fennell BJ, Naughton JA, Dempsey E, & Bell A (2006) Cellular and molecular actions of dinitroaniline and phosphorothioamidate herbicides on Plasmodium falciparum: tubulin as a specific antimalarial target. *Mol Biochem Parasitol* 145(2):226-238.
36. Wijayanti MA, *et al.* (2010) Additive in vitro antiplasmodial effect of N-alkyl and N-benzyl-1,10-phenanthroline derivatives and cysteine protease inhibitor e64. *Malar Res Treat* 2010:540786.
37. Uyemura SA, Luo S, Vieira M, Moreno SN, & Docampo R (2004) Oxidative phosphorylation and rotenone-insensitive malate- and NADH-quinone oxidoreductases in Plasmodium yoelii yoelii mitochondria in situ. *J Biol Chem* 279(1):385-393.
38. Gero AM, Brown GV, & O'Sullivan WJ (1984) Pyrimidine de novo synthesis during the life cycle of the intraerythrocytic stage of Plasmodium falciparum. *J Parasitol* 70(4):536-541.
39. Suraveratum N, Krungkrai SR, Leangaramgul P, Prapunwattana P, & Krungkrai J (2000) Purification and characterization of Plasmodium falciparum succinate dehydrogenase. *Mol Biochem Parasitol* 105(2):215-222.
40. Byun HO, Kim HY, Lim JJ, Seo YH, & Yoon G (2008) Mitochondrial dysfunction by complex II inhibition delays overall cell cycle progression via reactive oxygen species production. *J Cell Biochem* 104(5):1747-1759.
41. Andrews KT, *et al.* (2012) Comparative gene expression profiling of P. falciparum malaria parasites exposed to three different histone deacetylase inhibitors. *PLoS One* 7(2):e31847.
42. Andrews KT, Haque A, & Jones MK (2012) HDAC inhibitors in parasitic diseases. *Immunol Cell Biol* 90(1):66-77.

43. Balasubramanyam K, *et al.* (2004) Curcumin, a novel p300/CREB-binding protein-specific inhibitor of acetyltransferase, represses the acetylation of histone/nonhistone proteins and histone acetyltransferase-dependent chromatin transcription. *J Biol Chem* 279(49):51163-51171.
44. Pradhan A & Tuteja R (2006) Plasmodium falciparum DNA helicase 60. dsRNA- and antibody-mediated inhibition of malaria parasite growth and downregulation of its enzyme activities by DNA-interacting compounds. *FEBS J* 273(15):3545-3556.
45. Matsuda S & Koyasu S (2000) Mechanisms of action of cyclosporine. *Immunopharmacology* 47(2-3):119-125.
46. Gavigan CS, Kiely SP, Hirtzlin J, & Bell A (2003) Cyclosporin-binding proteins of Plasmodium falciparum. *Int J Parasitol* 33(9):987-996.
47. Kotaka M, *et al.* (2008) Crystal structure of the FK506 binding domain of Plasmodium falciparum FKBP35 in complex with FK506. *Biochemistry* 47(22):5951-5961.
48. Monaghan P & Bell A (2005) A Plasmodium falciparum FK506-binding protein (FKBP) with peptidyl-prolyl cis-trans isomerase and chaperone activities. *Mol Biochem Parasitol* 139(2):185-195.
49. Powers KG (1969) Activity of chlorinated lincomycin analogues against Plasmodium cynomolgi in rhesus monkeys. *Am J Trop Med Hyg* 18(4):485-490.
50. Schmidt LH (1985) Enhancement of the curative activity of primaquine by concomitant administration of mirincomycin. *Antimicrob Agents Chemother* 27(2):151-157.
51. Khemawoot P, *et al.* (2011) Absolute bioavailability of cis-mirincomycin and trans-mirincomycin in healthy rhesus monkeys and ex vivo antimalarial activity against Plasmodium falciparum. *Antimicrob Agents Chemother* 55(12):5881-5886.
52. White NJ (2008) Qinghaosu (artemisinin): the price of success. *Science* 320(5874):330-334.
53. Martin SK, Oduola AM, & Milhous WK (1987) Reversal of chloroquine resistance in Plasmodium falciparum by verapamil. *Science* 235(4791):899-901.
54. Martiney JA, Cerami A, & Slater AF (1995) Verapamil reversal of chloroquine resistance in the malaria parasite Plasmodium falciparum is specific for resistant parasites and independent of the weak base effect. *J Biol Chem* 270(38):22393-22398.
55. Ridley RG (1998) Malaria: dissecting chloroquine resistance. *Curr Biol* 8(10):R346-349.
56. Bitonti AJ, *et al.* (1988) Reversal of chloroquine resistance in malaria parasite Plasmodium falciparum by desipramine. *Science* 242(4883):1301-1303.
57. Mwai L, *et al.* (2012) Genome wide adaptations of Plasmodium falciparum in response to lumefantrine selective drug pressure. *PLoS One* 7(2):e31623.

52. White NJ (2008) Qinghaosu (artemisinin): the price of success. (Translated from eng) *Science* 320(5874):330-334 (in eng).
53. Martin SK, Oduola AM, & Milhous WK (1987) Reversal of chloroquine resistance in *Plasmodium falciparum* by verapamil. (Translated from eng) *Science* 235(4791):899-901 (in eng).
54. Martiney JA, Cerami A, & Slater AF (1995) Verapamil reversal of chloroquine resistance in the malaria parasite *Plasmodium falciparum* is specific for resistant parasites and independent of the weak base effect. (Translated from eng) *J Biol Chem* 270(38):22393-22398 (in eng).
55. Ridley RG (1998) Malaria: dissecting chloroquine resistance. (Translated from eng) *Curr Biol* 8(10):R346-349 (in eng).
56. Bitonti AJ, *et al.* (1988) Reversal of chloroquine resistance in malaria parasite *Plasmodium falciparum* by desipramine. (Translated from eng) *Science* 242(4883):1301-1303 (in eng).
57. Mwai L, *et al.* (2012) Genome wide adaptations of *Plasmodium falciparum* in response to lumefantrine selective drug pressure. (Translated from eng) *PloS one* 7(2):e31623 (in eng).

TABLE S3

## SUMMARY OF HIGH-THROUGHPUT FORWARD GENETICS SCREEN

All assays were conducted in batches of 10 mutants with Wild Type(NF54) in every batch.

All mutant values are represented as Fold Change derived from the wild type batchwise.

| INHIBITOR | Gene ID/Mutant |   | GI50  | R <sup>2</sup> |
|-----------|----------------|---|-------|----------------|
| ATQ       | PF3D7_0811300  | = | 0.43  | 0.93           |
| ATQ       | PF3D7_1305500  | = | 0.39  | 0.99           |
| ATQ       | PF3D7_0615900  | = | 1.53  | 0.91           |
| ATQ       | PF3D7_1122900  | = | 0.40  | 0.91           |
| ATQ       | PF3D7_1141900  | = | 0.54  | 0.98           |
| ATQ       | PF3D7_1475600  | = | 0.92  | 0.95           |
| ATQ       | PF3D7_0211100  | = | 3.08  | 1.00           |
| ATQ       | PF3D7_0203000  | = | 0.25  | 0.75           |
| ATQ       | PF3D7_0404600  | = | 3.51  | 0.99           |
| ATQ       | PF3D7_0416500  | = | 2.86  | 0.87           |
| ATQ       | PF3D7_1018400  | = | 0.64  | 0.95           |
| ATQ       | PF3D7_0511500  | = | 1.67  | 0.96           |
| ATQ       | PF3D7_1360200  | = | 1.85  | 0.95           |
| ATQ       | PF3D7_0611800  | = | 0.68  | 0.95           |
| ATQ       | PF3D7_0619900  | = | 4.90  | 0.99           |
| ATQ       | PF3D7_0521900  | = | 3.77  | 0.98           |
| ATQ       | PF3D7_1219300  | = | 0.74  | 0.88           |
| ATQ       | PF3D7_1133700  | = | 0.85  | 0.94           |
| ATQ       | PF3D7_0808700  | = | 0.44  | 0.92           |
| ATQ       | PF3D7_1136000  | = | 1.52  | 0.97           |
| ATQ       | PF3D7_0931000  | = | 4.11  | 0.95           |
| ATQ       | PF3D7_0830900  | = | 2.15  | 0.91           |
| ATQ       | PF3D7_1231800  | = | 14.15 | 0.92           |
| ATQ       | PF3D7_1035800  | = | 7.03  | 0.93           |
| ATQ       | PF3D7_1444100  | = | 5.21  | 0.90           |
| ATQ       | PF3D7_1138900  | = | 4.75  | 0.91           |
| ATQ       | PF3D7_1441800  | = | 0.27  | 0.80           |
| ATQ       | PF3D7_1345800  | = | 0.52  | 0.91           |
| ATQ       | PF3D7_1432400  | = | 1.31  | 0.97           |
| ATQ       | PF3D7_0819800  | = | 0.25  | 0.92           |
| ATQ       | PF3D7_1207800  | = | 0.75  | 0.94           |
| ATQ       | PF3D7_1143500  | = | 0.52  | 0.97           |
| ATQ       | PF3D7_1001600  | = | 0.38  | 0.96           |
| ATQ       | PF3D7_1019400  | = | 0.48  | 0.91           |
| ATQ       | PF3D7_1311900  | = | 13.35 | 0.98           |
| ATQ       | PF3D7_1035700  | = | 0.31  | 0.96           |
| ATQ       | PF3D7_1103100  | = | 0.94  | 0.98           |
| ATQ       | PF3D7_0812500  | = | 0.52  | 0.93           |
| ATQ       | PF3D7_1216100  | = | 0.71  | 0.97           |
| ATQ       | PF3D7_0206100  | = | 1.17  | 0.97           |
| ATQ       | PF3D7_1352500  | = | 1.26  | 0.91           |
| ATQ       | PF3D7_1226900  | = | 0.19  | 0.96           |
| ATQ       | PF3D7_1368800  | = | 1.89  | 0.97           |
| ATQ       | PF3D7_1432400  | = | 3.29  | 0.99           |

|     |               |   |          |      |
|-----|---------------|---|----------|------|
| ATQ | PF3D7_1343900 | = | 3.03     | 0.98 |
| ATQ | PF3D7_1328800 | = | 1.23     | 0.91 |
| ATQ | PF3D7_1138700 | = | 1.09     | 0.97 |
| ATQ | PF3D7_1327100 | = | 0.12     | 0.92 |
| ATQ | PF3D7_1136600 | = | 0.84     | 1.00 |
| ATQ | PF3D7_0902200 | = | 0.45     | 0.92 |
| ATQ | PF3D7_0727100 | = | 0.29     | 0.90 |
| ATQ | PF3D7_0105500 | = | 0.22     | 0.85 |
| ATQ | PF3D7_1126100 | = | 0.06     | 0.88 |
| ATQ | PF3D7_1343700 | = | 0.05     | 0.92 |
| ATQ | PF3D7_1330500 | = | 1.93     | 0.94 |
| ATQ | PF3D7_1343000 | = | 1.33     | 0.92 |
| ATQ | PF3D7_1302000 | = | 9.18     | 0.92 |
| ATQ | PF3D7_1107900 | = | 0.29     | 0.89 |
| ATQ | PF3D7_0606000 | = | 0.51     | 0.86 |
| ATQ | PF3D7_0614500 | = | 4.12     | 0.88 |
| ATQ | PF3D7_0203700 | = | 3.64     | 0.91 |
| ATQ | PF3D7_0601700 | = | 5.74     | 0.87 |
| ATQ | PF3D7_1001900 | = | 1.63     | 0.93 |
| ATQ | PF3D7_1409500 | = | 1.22     | 0.92 |
| ATQ | PF3D7_0916700 | = | 1.14     | 0.94 |
| ATQ | PF3D7_0402000 | = | 0.76     | 0.91 |
| ATQ | PF3D7_0102600 | = | 1.38     | 0.96 |
| ATQ | PF3D7_1433400 | = | 0.73     | 0.98 |
| ATQ | PF3D7_0322000 | = | 1.04     | 0.91 |
| ATQ | PF3D7_0623900 | = | 0.79     | 0.92 |
| ATQ | PF3D7_1013500 | < | 0.017 uM | 0.00 |

|     |               |   |      |      |
|-----|---------------|---|------|------|
| MZB | PF3D7_0811300 | = | 1.14 | 0.99 |
| MZB | PF3D7_1305500 | = | 0.75 | 0.98 |
| MZB | PF3D7_0615900 | = | 0.95 | 0.90 |
| MZB | PF3D7_1122900 | = | 0.52 | 0.96 |
| MZB | PF3D7_1141900 | = | 1.73 | 0.93 |
| MZB | PF3D7_1475600 | = | 0.65 | 0.98 |
| MZB | PF3D7_0211100 | = | 1.55 | 0.98 |
| MZB | PF3D7_0203000 | = | 1.18 | 0.88 |
| MZB | PF3D7_0404600 | = | 0.66 | 0.98 |
| MZB | PF3D7_0416500 | = | 1.64 | 0.98 |
| MZB | PF3D7_1018400 | = | 1.63 | 1.00 |
| MZB | PF3D7_0511500 | = | 2.43 | 1.00 |
| MZB | PF3D7_1360200 | = | 1.54 | 0.99 |
| MZB | PF3D7_0611800 | = | 1.25 | 0.97 |
| MZB | PF3D7_0619900 | = | 1.21 | 0.99 |
| MZB | PF3D7_0521900 | = | 1.34 | 0.97 |
| MZB | PF3D7_1219300 | = | 1.59 | 0.99 |
| MZB | PF3D7_1133700 | = | 0.71 | 0.97 |
| MZB | PF3D7_0808700 | = | 1.45 | 0.97 |
| MZB | PF3D7_1136000 | = | 0.94 | 0.96 |
| MZB | PF3D7_0931000 | = | 0.77 | 0.92 |
| MZB | PF3D7_0830900 | = | 0.52 | 0.96 |



|     |               |   |      |      |
|-----|---------------|---|------|------|
| MZB | PF3D7_1231800 | = | 1.60 | 0.97 |
| MZB | PF3D7_1035800 | = | 1.19 | 0.95 |
| MZB | PF3D7_1444100 | = | 1.68 | 0.99 |
| MZB | PF3D7_1138900 | = | 0.42 | 0.89 |
| MZB | PF3D7_1441800 | = | 0.52 | 1.00 |
| MZB | PF3D7_1345800 | = | 0.63 | 1.00 |
| MZB | PF3D7_1432400 | = | 0.83 | 1.00 |
| MZB | PF3D7_0819800 | = | 0.65 | 0.99 |
| MZB | PF3D7_1207800 | = | 0.75 | 1.00 |
| MZB | PF3D7_1143500 | = | 0.92 | 1.00 |
| MZB | PF3D7_1001600 | = | 0.51 | 1.00 |
| MZB | PF3D7_1019400 | = | 0.25 | 0.99 |
| MZB | PF3D7_1311900 | = | 0.54 | 0.99 |
| MZB | PF3D7_1035700 | = | 0.53 | 0.99 |
| MZB | PF3D7_1103100 | = | 1.37 | 0.98 |
| MZB | PF3D7_0812500 | = | 1.01 | 0.96 |
| MZB | PF3D7_1216100 | = | 1.61 | 0.99 |
| MZB | PF3D7_0206100 | = | 0.62 | 0.97 |
| MZB | PF3D7_1352500 | = | 0.67 | 0.98 |
| MZB | PF3D7_1226900 | = | 1.12 | 0.99 |
| MZB | PF3D7_1368800 | = | 0.57 | 0.99 |
| MZB | PF3D7_1432400 | = | 1.65 | 0.97 |
| MZB | PF3D7_1343900 | = | 0.93 | 0.92 |
| MZB | PF3D7_1328800 | = | 0.47 | 0.97 |
| MZB | PF3D7_1138700 | = | 0.37 | 0.99 |
| MZB | PF3D7_1327100 | = | 0.38 | 0.99 |
| MZB | PF3D7_1136600 | = | 0.32 | 0.99 |
| MZB | PF3D7_0902200 | = | 0.15 | 0.96 |
| MZB | PF3D7_0727100 | = | 0.06 | 0.86 |
| MZB | PF3D7_0105500 | = | 0.25 | 0.99 |
| MZB | PF3D7_1126100 | = | 0.08 | 0.97 |
| MZB | PF3D7_1343700 | = | 0.15 | 0.99 |
| MZB | PF3D7_1330500 | = | 1.70 | 0.99 |
| MZB | PF3D7_1343000 | = | 2.07 | 0.98 |
| MZB | PF3D7_1302000 | = | 2.07 | 1.00 |
| MZB | PF3D7_1107900 | = | 1.32 | 0.97 |
| MZB | PF3D7_0606000 | = | 1.37 | 0.99 |
| MZB | PF3D7_0614500 | = | 1.24 | 0.99 |
| MZB | PF3D7_0203700 | = | 1.37 | 0.99 |
| MZB | PF3D7_0601700 | = | 1.38 | 1.00 |
| MZB | PF3D7_1001900 | = | 1.03 | 0.99 |
| MZB | PF3D7_1409500 | = | 0.98 | 0.99 |
| MZB | PF3D7_0916700 | = | 0.51 | 0.96 |
| MZB | PF3D7_0402000 | = | 0.55 | 0.98 |
| MZB | PF3D7_0102600 | = | 0.92 | 0.97 |
| MZB | PF3D7_1433400 | = | 0.89 | 0.99 |
| MZB | PF3D7_0322000 | = | 1.04 | 0.99 |
| MZB | PF3D7_0623900 | = | 0.80 | 0.98 |
| MZB | PF3D7_1013500 | = | 0.02 | 0.98 |

|     |               |   |          |      |
|-----|---------------|---|----------|------|
| MTX | PF3D7_0811300 | = | 300.00   | 0.98 |
| MTX | PF3D7_1305500 | = | 263.95   | 0.98 |
| MTX | PF3D7_0615900 | = | 131.40   | 0.89 |
| MTX | PF3D7_1122900 | = | 179.07   | 0.94 |
| MTX | PF3D7_1141900 | = | 634.88   | 0.89 |
| MTX | PF3D7_1475600 | = | 3.60     | 0.90 |
| MTX | PF3D7_0211100 | = | 74.42    | 0.93 |
| MTX | PF3D7_0203000 | = | 145.35   | 0.97 |
| MTX | PF3D7_0404600 | = | 239.53   | 0.96 |
| MTX | PF3D7_0416500 | = | 67.83    | 1.00 |
| MTX | PF3D7_1018400 | = | 126.55   | 0.99 |
| MTX | PF3D7_0511500 | = | 83.99    | 1.00 |
| MTX | PF3D7_1360200 | = | 82.69    | 0.99 |
| MTX | PF3D7_0611800 | = | 102.10   | 0.96 |
| MTX | PF3D7_0619900 | = | 65.79    | 0.97 |
| MTX | PF3D7_0521900 | = | 137.86   | 0.99 |
| MTX | PF3D7_1219300 | = | 1.45     | 0.98 |
| MTX | PF3D7_1133700 | = | 43.31    | 0.98 |
| MTX | PF3D7_0808700 | = | 0.80     | 0.92 |
| MTX | PF3D7_1136000 | = | 81.14    | 0.98 |
| MTX | PF3D7_0931000 | = | 84.98    | 0.99 |
| MTX | PF3D7_0830900 | = | 41.74    | 0.96 |
| MTX | PF3D7_1231800 | = | 73.43    | 0.97 |
| MTX | PF3D7_1035800 | = | 89.36    | 0.96 |
| MTX | PF3D7_1444100 | = | 109.98   | 0.95 |
| MTX | PF3D7_1138900 | = | 5.00     | 0.96 |
| MTX | PF3D7_1441800 | = | 88.20    | 0.99 |
| MTX | PF3D7_1345800 | = | 110.58   | 0.96 |
| MTX | PF3D7_1432400 | = | 138.79   | 1.00 |
| MTX | PF3D7_0819800 | = | 79.26    | 0.94 |
| MTX | PF3D7_1207800 | = | 0.91     | 0.92 |
| MTX | PF3D7_1143500 | = | 88.73    | 0.95 |
| MTX | PF3D7_1001600 | = | 75.38    | 0.76 |
| MTX | PF3D7_1019400 | = | 90.16    | 0.98 |
| MTX | PF3D7_1311900 | = | 90.44    | 0.98 |
| MTX | PF3D7_1035700 | = | 66.36    | 0.94 |
| MTX | PF3D7_1103100 | = | 136.19   | 0.99 |
| MTX | PF3D7_0812500 | = | 77.29    | 0.97 |
| MTX | PF3D7_1216100 | = | 427.92   | 0.98 |
| MTX | PF3D7_0206100 | = | 503.84   | 1.00 |
| MTX | PF3D7_1352500 | = | 2.03     | 0.99 |
| MTX | PF3D7_1226900 | = | 462.16   | 1.00 |
| MTX | PF3D7_1368800 | = | 257.21   | 0.99 |
| MTX | PF3D7_1432400 | = | 725.94   | 1.00 |
| MTX | PF3D7_1343900 | = | 428.73   | 0.99 |
| MTX | PF3D7_1328800 | = | 406.40   | 0.99 |
| MTX | PF3D7_1138700 | = | 19748.00 | 0.99 |
| MTX | PF3D7_1327100 | = | 15717.50 | 0.98 |
| MTX | PF3D7_1136600 | = | 14196.00 | 0.99 |
| MTX | PF3D7_0902200 | = | 5507.00  | 0.97 |
| MTX | PF3D7_0727100 | = | 8063.00  | 0.98 |
| MTX | PF3D7_0105500 | = | 12051.00 | 0.99 |

|     |               |   |         |      |
|-----|---------------|---|---------|------|
| MTX | PF3D7_1126100 | = | 2795.00 | 0.98 |
| MTX | PF3D7_1343700 | = | 8948.00 | 0.99 |
| MTX | PF3D7_1330500 | = | 609.96  | 0.99 |
| MTX | PF3D7_1343000 | = | 1074.43 | 0.99 |
| MTX | PF3D7_1302000 | = | 1.36    | 0.97 |
| MTX | PF3D7_1107900 | = | 896.79  | 0.97 |
| MTX | PF3D7_0606000 | = | 681.93  | 0.99 |
| MTX | PF3D7_0614500 | > | 9170 uM |      |
| MTX | PF3D7_0203700 | > | 9170 uM |      |
| MTX | PF3D7_0601700 | = | 618.61  | 1.00 |
| MTX | PF3D7_1001900 | = | 223.33  | 0.94 |
| MTX | PF3D7_1409500 | = | 182.65  | 0.99 |
| MTX | PF3D7_0916700 | = | 134.43  | 0.91 |
| MTX | PF3D7_0402000 | = | 4.23    | 0.98 |
| MTX | PF3D7_0102600 | = | 224.49  | 1.00 |
| MTX | PF3D7_1433400 | = | 194.13  | 0.99 |
| MTX | PF3D7_0322000 | = | 262.18  | 0.98 |
| MTX | PF3D7_0623900 | = | 191.25  | 0.98 |
| MTX | PF3D7_1013500 | = | 26.82   | 0.97 |

|      |               |   |       |      |
|------|---------------|---|-------|------|
| TCPA | PF3D7_0811300 | = | 1.35  | 0.99 |
| TCPA | PF3D7_1305500 | = | 0.78  | 1.00 |
| TCPA | PF3D7_0615900 | = | 1.89  | 0.92 |
| TCPA | PF3D7_1122900 | = | 1.12  | 0.94 |
| TCPA | PF3D7_1141900 | = | 1.22  | 0.94 |
| TCPA | PF3D7_1475600 | = | 0.68  | 0.96 |
| TCPA | PF3D7_0211100 | = | 0.60  | 0.93 |
| TCPA | PF3D7_0203000 | = | 0.77  | 0.95 |
| TCPA | PF3D7_0404600 | = | 1.63  | 0.99 |
| TCPA | PF3D7_0416500 | = | 0.22  | 0.94 |
| TCPA | PF3D7_1018400 | = | 1.30  | 0.99 |
| TCPA | PF3D7_0511500 | = | 0.00  | 0.65 |
| TCPA | PF3D7_1360200 | = | 0.53  | 0.97 |
| TCPA | PF3D7_0611800 | = | 0.76  | 0.97 |
| TCPA | PF3D7_0619900 | = | 0.81  | 0.96 |
| TCPA | PF3D7_0521900 | = | 1.59  | 1.00 |
| TCPA | PF3D7_1219300 | = | 1.78  | 0.99 |
| TCPA | PF3D7_1133700 | = | 0.53  | 0.99 |
| TCPA | PF3D7_0808700 | = | 12.51 | 0.95 |
| TCPA | PF3D7_1136000 | = | 0.24  | 0.98 |
| TCPA | PF3D7_0931000 | = | 0.36  | 1.00 |
| TCPA | PF3D7_0830900 | = | 0.16  | 0.96 |
| TCPA | PF3D7_1231800 | = | 0.43  | 1.00 |
| TCPA | PF3D7_1035800 | = | 0.37  | 1.00 |
| TCPA | PF3D7_1444100 | = | 0.40  | 0.98 |
| TCPA | PF3D7_1138900 | = | 0.26  | 0.97 |
| TCPA | PF3D7_1441800 | = | 0.68  | 0.99 |
| TCPA | PF3D7_1345800 | = | 0.72  | 0.99 |
| TCPA | PF3D7_1432400 | = | 2.05  | 0.97 |
| TCPA | PF3D7_0819800 | = | 0.60  | 0.96 |

|      |               |   |      |      |
|------|---------------|---|------|------|
| TCPA | PF3D7_1207800 | = | 0.23 | 0.96 |
| TCPA | PF3D7_1143500 | = | 0.69 | 0.97 |
| TCPA | PF3D7_1001600 | = | 0.80 | 0.98 |
| TCPA | PF3D7_1019400 | = | 0.73 | 0.97 |
| TCPA | PF3D7_1311900 | = | 0.69 | 0.98 |
| TCPA | PF3D7_1035700 | = | 0.40 | 0.99 |
| TCPA | PF3D7_1103100 | = | 1.37 | 1.00 |
| TCPA | PF3D7_0812500 | = | 0.72 | 0.99 |
| TCPA | PF3D7_1216100 | = | 0.95 | 0.99 |
| TCPA | PF3D7_0206100 | = | 1.00 | 0.99 |
| TCPA | PF3D7_1352500 | = | 0.50 | 0.99 |
| TCPA | PF3D7_1226900 | = | 0.73 | 0.98 |
| TCPA | PF3D7_1368800 | = | 0.38 | 0.96 |
| TCPA | PF3D7_1432400 | = | 3.53 | 0.97 |
| TCPA | PF3D7_1343900 | = | 0.72 | 0.99 |
| TCPA | PF3D7_1328800 | = | 1.59 | 0.89 |
| TCPA | PF3D7_1138700 | = | 0.74 | 0.97 |
| TCPA | PF3D7_1327100 | = | 1.17 | 0.99 |
| TCPA | PF3D7_1136600 | = | 0.60 | 0.98 |
| TCPA | PF3D7_0902200 | = | 0.38 | 0.98 |
| TCPA | PF3D7_0727100 | = | 0.52 | 0.99 |
| TCPA | PF3D7_0105500 | = | 0.75 | 0.99 |
| TCPA | PF3D7_1126100 | = | 0.09 | 0.97 |
| TCPA | PF3D7_1343700 | = | 0.21 | 0.99 |
| TCPA | PF3D7_1330500 | = | 1.49 | 1.00 |
| TCPA | PF3D7_1343000 | = | 2.91 | 0.99 |
| TCPA | PF3D7_1302000 | = | 1.67 | 1.00 |
| TCPA | PF3D7_1107900 | = | 0.53 | 0.96 |
| TCPA | PF3D7_0606000 | = | 1.34 | 0.99 |
| TCPA | PF3D7_0614500 | = | 1.16 | 0.98 |
| TCPA | PF3D7_0203700 | = | 0.42 | 0.97 |
| TCPA | PF3D7_0601700 | = | 0.61 | 0.98 |
| TCPA | PF3D7_1001900 | = | 1.88 | 0.93 |
| TCPA | PF3D7_1409500 | = | 1.08 | 0.98 |
| TCPA | PF3D7_0916700 | = | 0.67 | 0.96 |
| TCPA | PF3D7_0402000 | = | 0.99 | 0.99 |
| TCPA | PF3D7_0102600 | = | 1.52 | 0.99 |
| TCPA | PF3D7_1433400 | = | 1.29 | 0.93 |
| TCPA | PF3D7_0322000 | = | 1.04 | 0.97 |
| TCPA | PF3D7_0623900 | = | 0.85 | 0.96 |
| TCPA | PF3D7_1013500 | = | 1.15 | 0.97 |

|      |               |   |      |      |
|------|---------------|---|------|------|
| TOFA | PF3D7_0811300 | = | 0.29 | 0.92 |
| TOFA | PF3D7_1305500 | = | 0.81 | 0.98 |
| TOFA | PF3D7_0615900 | = | 1.09 | 1.00 |
| TOFA | PF3D7_1122900 | = | 0.70 | 0.97 |
| TOFA | PF3D7_1141900 | = | 0.79 | 0.97 |
| TOFA | PF3D7_1475600 | = | 0.75 | 0.97 |
| TOFA | PF3D7_0211100 | = | 0.67 | 0.96 |
| TOFA | PF3D7_0203000 | = | 4.30 | 0.79 |

|      |               |   |      |      |
|------|---------------|---|------|------|
| TOFA | PF3D7_0404600 | = | 0.66 | 0.97 |
| TOFA | PF3D7_0416500 | = | 1.54 | 0.99 |
| TOFA | PF3D7_1018400 | = | 0.55 | 0.93 |
| TOFA | PF3D7_0511500 | = | 0.99 | 0.95 |
| TOFA | PF3D7_1360200 | = | 0.50 | 0.94 |
| TOFA | PF3D7_0611800 | = | 0.70 | 0.97 |
| TOFA | PF3D7_0619900 | = | 0.60 | 1.00 |
| TOFA | PF3D7_0521900 | = | 1.54 | 0.98 |
| TOFA | PF3D7_1219300 | = | 1.63 | 0.98 |
| TOFA | PF3D7_1133700 | = | 1.32 | 0.95 |
| TOFA | PF3D7_0808700 | = | 1.07 | 0.96 |
| TOFA | PF3D7_1136000 | = | 0.76 | 0.97 |
| TOFA | PF3D7_0931000 | = | 2.11 | 0.98 |
| TOFA | PF3D7_0830900 | = | 1.90 | 0.98 |
| TOFA | PF3D7_1231800 | = | 2.51 | 0.97 |
| TOFA | PF3D7_1035800 | = | 2.04 | 0.96 |
| TOFA | PF3D7_1444100 | = | 1.69 | 0.94 |
| TOFA | PF3D7_1138900 | = | 2.10 | 0.97 |
| TOFA | PF3D7_1441800 | = | 0.33 | 0.99 |
| TOFA | PF3D7_1345800 | = | 0.62 | 0.99 |
| TOFA | PF3D7_1432400 | = | 0.98 | 0.99 |
| TOFA | PF3D7_0819800 | = | 0.50 | 0.98 |
| TOFA | PF3D7_1207800 | = | 0.77 | 0.99 |
| TOFA | PF3D7_1143500 | = | 0.46 | 1.00 |
| TOFA | PF3D7_1001600 | = | 0.70 | 1.00 |
| TOFA | PF3D7_1019400 | = | 1.29 | 1.00 |
| TOFA | PF3D7_1311900 | = | 0.49 | 1.00 |
| TOFA | PF3D7_1035700 | = | 0.41 | 1.00 |
| TOFA | PF3D7_1103100 | = | 0.21 | 0.91 |
| TOFA | PF3D7_0812500 | = | 0.51 | 0.99 |
| TOFA | PF3D7_1216100 | = | 0.61 | 0.99 |
| TOFA | PF3D7_0206100 | = | 0.65 | 0.98 |
| TOFA | PF3D7_1352500 | = | 0.36 | 0.99 |
| TOFA | PF3D7_1226900 | = | 0.76 | 1.00 |
| TOFA | PF3D7_1368800 | = | 0.78 | 0.99 |
| TOFA | PF3D7_1432400 | = | 0.73 | 0.99 |
| TOFA | PF3D7_1343900 | = | 0.49 | 0.99 |
| TOFA | PF3D7_1328800 | = | 0.75 | 0.95 |
| TOFA | PF3D7_1138700 | = | 0.50 | 0.98 |
| TOFA | PF3D7_1327100 | = | 0.27 | 0.99 |
| TOFA | PF3D7_1136600 | = | 0.48 | 0.98 |
| TOFA | PF3D7_0902200 | = | 0.58 | 0.99 |
| TOFA | PF3D7_0727100 | = | 0.52 | 0.99 |
| TOFA | PF3D7_0105500 | = | 0.26 | 0.99 |
| TOFA | PF3D7_1126100 | = | 0.52 | 0.99 |
| TOFA | PF3D7_1343700 | = | 0.27 | 0.99 |
| TOFA | PF3D7_1330500 | = | 0.83 | 0.99 |
| TOFA | PF3D7_1343000 | = | 0.35 | 0.99 |
| TOFA | PF3D7_1302000 | = | 1.22 | 0.99 |
| TOFA | PF3D7_1107900 | = | 0.48 | 0.99 |
| TOFA | PF3D7_0606000 | = | 1.25 | 0.98 |
| TOFA | PF3D7_0614500 | = | 1.14 | 0.99 |

|      |               |   |      |      |
|------|---------------|---|------|------|
| TOFA | PF3D7_0203700 | = | 1.44 | 1.00 |
| TOFA | PF3D7_0601700 | = | 1.00 | 0.99 |
| TOFA | PF3D7_1001900 | = | 1.21 | 0.99 |
| TOFA | PF3D7_1409500 | = | 0.02 | 0.93 |
| TOFA | PF3D7_0916700 | = | 1.31 | 0.98 |
| TOFA | PF3D7_0402000 | = | 1.02 | 0.98 |
| TOFA | PF3D7_0102600 | = | 1.18 | 1.00 |
| TOFA | PF3D7_1433400 | = | 0.75 | 0.99 |
| TOFA | PF3D7_0322000 | = | 1.17 | 1.00 |
| TOFA | PF3D7_0623900 | = | 1.02 | 0.98 |
| TOFA | PF3D7_1013500 | = | 6.55 | 0.97 |

|     |               |   |      |      |
|-----|---------------|---|------|------|
| CRL | PF3D7_0811300 |   | 0.02 | 0.99 |
| CRL | PF3D7_1305500 | = | 1.13 | 0.99 |
| CRL | PF3D7_0615900 | = | 1.21 | 0.91 |
| CRL | PF3D7_1122900 | = | 0.76 | 0.91 |
| CRL | PF3D7_1141900 | = | 1.13 | 0.92 |
| CRL | PF3D7_1475600 | = | 0.28 | 0.92 |
| CRL | PF3D7_0211100 | = | 0.38 | 0.89 |
| CRL | PF3D7_0203000 | = | 0.65 | 0.93 |
| CRL | PF3D7_0404600 | = | 1.50 | 0.99 |
| CRL | PF3D7_0416500 | = | 1.17 | 0.98 |
| CRL | PF3D7_1018400 | = | 2.33 | 0.97 |
| CRL | PF3D7_0511500 | = | 1.47 | 0.99 |
| CRL | PF3D7_1360200 | = | 2.10 | 0.99 |
| CRL | PF3D7_0611800 | = | 1.11 | 0.98 |
| CRL | PF3D7_0619900 | = | 0.68 | 0.97 |
| CRL | PF3D7_0521900 | = | 4.44 | 0.97 |
| CRL | PF3D7_1219300 | = | 2.44 | 0.97 |
| CRL | PF3D7_1133700 | = | 1.12 | 0.97 |
| CRL | PF3D7_0808700 | = | 2.42 | 0.97 |
| CRL | PF3D7_1136000 | = | 0.75 | 0.92 |
| CRL | PF3D7_0931000 | = | 2.06 | 0.99 |
| CRL | PF3D7_0830900 | = | 0.74 | 0.93 |
| CRL | PF3D7_1231800 | = | 3.77 | 0.96 |
| CRL | PF3D7_1035800 | = | 2.73 | 0.93 |
| CRL | PF3D7_1444100 | = | 4.92 | 0.93 |
| CRL | PF3D7_1138900 | = | 2.29 | 0.93 |
| CRL | PF3D7_1441800 | = | 0.64 | 0.97 |
| CRL | PF3D7_1345800 | = | 0.98 | 0.91 |
| CRL | PF3D7_1432400 | = | 1.25 | 0.97 |
| CRL | PF3D7_0819800 | = | 0.68 | 0.97 |
| CRL | PF3D7_1207800 | = | 0.13 | 0.93 |
| CRL | PF3D7_1143500 | = | 0.28 | 0.96 |
| CRL | PF3D7_1001600 | = | 0.17 | 0.91 |
| CRL | PF3D7_1019400 | = | 0.66 | 0.98 |
| CRL | PF3D7_1311900 | = | 0.49 | 0.98 |
| CRL | PF3D7_1035700 | = | 0.47 | 0.93 |
| CRL | PF3D7_1103100 | = | 0.98 | 0.99 |
| CRL | PF3D7_0812500 | = | 0.52 | 0.96 |

|     |               |   |      |      |
|-----|---------------|---|------|------|
| CRL | PF3D7_1216100 | = | 0.53 | 0.96 |
| CRL | PF3D7_0206100 | = | 0.96 | 0.95 |
| CRL | PF3D7_1352500 | = | 1.13 | 0.97 |
| CRL | PF3D7_1226900 | = | 1.56 | 0.98 |
| CRL | PF3D7_1368800 | = | 0.29 | 0.96 |
| CRL | PF3D7_1432400 | = | 2.13 | 0.97 |
| CRL | PF3D7_1343900 | = | 0.97 | 0.98 |
| CRL | PF3D7_1328800 | = | 1.07 | 0.96 |
| CRL | PF3D7_1138700 | = | 0.32 | 0.98 |
| CRL | PF3D7_1327100 | = | 0.13 | 0.99 |
| CRL | PF3D7_1136600 | = | 0.16 | 0.99 |
| CRL | PF3D7_0902200 | = | 0.06 | 0.98 |
| CRL | PF3D7_0727100 | = | 0.06 | 0.97 |
| CRL | PF3D7_0105500 | = | 0.19 | 0.98 |
| CRL | PF3D7_1126100 | = | 0.01 | 0.97 |
| CRL | PF3D7_1343700 | = | 0.05 | 0.98 |
| CRL | PF3D7_1330500 | = | 2.54 | 0.98 |
| CRL | PF3D7_1343000 | = | 6.32 | 0.99 |
| CRL | PF3D7_1302000 | = | 4.23 | 0.99 |
| CRL | PF3D7_1107900 | = | 2.26 | 0.99 |
| CRL | PF3D7_0606000 | = | 4.48 | 0.99 |
| CRL | PF3D7_0614500 | = | 3.03 | 0.99 |
| CRL | PF3D7_0203700 | = | 1.40 | 0.99 |
| CRL | PF3D7_0601700 | = | 3.82 | 0.99 |
| CRL | PF3D7_1001900 | = | 0.99 | 0.99 |
| CRL | PF3D7_1409500 | = | 0.75 | 1.00 |
| CRL | PF3D7_0916700 | = | 0.65 | 0.95 |
| CRL | PF3D7_0402000 | = | 0.92 | 1.00 |
| CRL | PF3D7_0102600 | = | 1.41 | 1.00 |
| CRL | PF3D7_1433400 | = | 0.85 | 0.95 |
| CRL | PF3D7_0322000 | = | 0.99 | 0.99 |
| CRL | PF3D7_0623900 | = | 0.90 | 0.98 |
| CRL | PF3D7_1013500 | = | 0.33 | 0.98 |

|     |               |   |      |      |
|-----|---------------|---|------|------|
| TRI | PF3D7_0811300 | = | 0.15 | 0.96 |
| TRI | PF3D7_1305500 | = | 0.14 | 0.97 |
| TRI | PF3D7_0615900 | = | 0.57 | 0.99 |
| TRI | PF3D7_1122900 | = | 0.12 | 0.97 |
| TRI | PF3D7_1141900 | = | 0.08 | 0.95 |
| TRI | PF3D7_1475600 | = | 0.30 | 0.97 |
| TRI | PF3D7_0211100 | = | 0.52 | 0.97 |
| TRI | PF3D7_0203000 | = | 2.55 | 0.84 |
| TRI | PF3D7_0404600 | = | 6.30 | 0.94 |
| TRI | PF3D7_0416500 | = | 1.10 | 0.99 |
| TRI | PF3D7_1018400 | = | 0.54 | 0.97 |
| TRI | PF3D7_0511500 | = | 4.43 | 0.96 |
| TRI | PF3D7_1360200 | = | 0.42 | 0.98 |
| TRI | PF3D7_0611800 | = | 2.72 | 0.95 |
| TRI | PF3D7_0619900 | = | 1.38 | 0.98 |
| TRI | PF3D7_0521900 | = | 3.08 | 0.97 |

|     |               |   |       |      |
|-----|---------------|---|-------|------|
| TRI | PF3D7_1219300 | = | 1.32  | 0.99 |
| TRI | PF3D7_1133700 | = | 6.03  | 0.97 |
| TRI | PF3D7_0808700 | = | 3.50  | 0.96 |
| TRI | PF3D7_1136000 | = | 3.91  | 0.93 |
| TRI | PF3D7_0931000 | = | 8.89  | 0.99 |
| TRI | PF3D7_0830900 | = | 5.75  | 0.96 |
| TRI | PF3D7_1231800 | = | 8.82  | 0.96 |
| TRI | PF3D7_1035800 | = | 1.35  | 0.96 |
| TRI | PF3D7_1444100 | = | 1.94  | 0.98 |
| TRI | PF3D7_1138900 | = | 3.87  | 0.96 |
| TRI | PF3D7_1441800 | = | 3.31  | 0.94 |
| TRI | PF3D7_1345800 | = | 46.21 | 0.94 |
| TRI | PF3D7_1432400 | = | 1.60  | 0.92 |
| TRI | PF3D7_0819800 | = | 0.82  | 0.92 |
| TRI | PF3D7_1207800 | = | 0.86  | 0.90 |
| TRI | PF3D7_1143500 | = | 1.93  | 0.94 |
| TRI | PF3D7_1001600 | = | 0.63  | 0.92 |
| TRI | PF3D7_1019400 | = | 6.41  | 0.89 |
| TRI | PF3D7_1311900 | = | 0.24  | 0.92 |
| TRI | PF3D7_1035700 | = | 0.86  | 0.96 |
| TRI | PF3D7_1103100 | = | 0.37  | 0.97 |
| TRI | PF3D7_0812500 | = | 0.56  | 0.98 |
| TRI | PF3D7_1216100 | = | 1.16  | 0.94 |
| TRI | PF3D7_0206100 | = | 2.03  | 0.94 |
| TRI | PF3D7_1352500 | = | 1.67  | 0.94 |
| TRI | PF3D7_1226900 | = | 0.37  | 0.89 |
| TRI | PF3D7_1368800 | = | 1.41  | 0.96 |
| TRI | PF3D7_1432400 | = | 1.86  | 0.93 |
| TRI | PF3D7_1343900 | = | 2.05  | 0.92 |
| TRI | PF3D7_1328800 | = | 0.47  | 0.97 |
| TRI | PF3D7_1138700 | = | 0.93  | 0.98 |
| TRI | PF3D7_1327100 | = | 0.22  | 0.99 |
| TRI | PF3D7_1136600 | = | 0.74  | 0.96 |
| TRI | PF3D7_0902200 | = | 0.45  | 0.98 |
| TRI | PF3D7_0727100 | = | 0.23  | 0.98 |
| TRI | PF3D7_0105500 | = | 0.05  | 0.96 |
| TRI | PF3D7_1126100 | = | 0.03  | 0.88 |
| TRI | PF3D7_1343700 | = | 0.06  | 0.95 |
| TRI | PF3D7_1330500 | = | 0.58  | 0.99 |
| TRI | PF3D7_1343000 | = | 0.75  | 0.97 |
| TRI | PF3D7_1302000 | = | 1.71  | 0.98 |
| TRI | PF3D7_1107900 | = | 0.27  | 0.97 |
| TRI | PF3D7_0606000 | = | 0.98  | 0.97 |
| TRI | PF3D7_0614500 | = | 6.78  | 0.99 |
| TRI | PF3D7_0203700 | = | 0.71  | 0.95 |
| TRI | PF3D7_0601700 | = | 1.20  | 0.94 |
| TRI | PF3D7_1001900 | = | 1.10  | 0.98 |
| TRI | PF3D7_1409500 | = | 0.31  | 0.96 |
| TRI | PF3D7_0916700 | = | 0.06  | 0.93 |
| TRI | PF3D7_0402000 | = | 0.62  | 0.94 |
| TRI | PF3D7_0102600 | = | 0.03  | 0.97 |
| TRI | PF3D7_1433400 | = | 0.17  | 0.97 |



|     |               |   |       |      |
|-----|---------------|---|-------|------|
| TRI | PF3D7_0322000 | = | 0.33  | 0.89 |
| TRI | PF3D7_0623900 | = | 0.31  | 0.84 |
| TRI | PF3D7_1013500 | = | 0.01  | 0.94 |
|     |               |   |       |      |
| CYC | PF3D7_0811300 | = | 21.85 | 0.96 |
| CYC | PF3D7_1305500 | = | 0.87  | 0.98 |
| CYC | PF3D7_0615900 | = | 0.55  | 0.86 |
| CYC | PF3D7_1122900 | = | 0.60  | 0.95 |
| CYC | PF3D7_1141900 | = | 0.47  | 0.89 |
| CYC | PF3D7_1475600 | = | 0.66  | 0.89 |
| CYC | PF3D7_0211100 | = | 0.30  | 0.90 |
| CYC | PF3D7_0203000 | = | 0.55  | 0.99 |
| CYC | PF3D7_0404600 | = | 1.36  | 0.99 |
| CYC | PF3D7_0416500 | = | 0.88  | 0.93 |
| CYC | PF3D7_1018400 | = | 1.29  | 0.96 |
| CYC | PF3D7_0511500 | = | 1.09  | 0.99 |
| CYC | PF3D7_1360200 | = | 1.63  | 0.98 |
| CYC | PF3D7_0611800 | = | 0.28  | 0.83 |
| CYC | PF3D7_0619900 | = | 1.79  | 0.94 |
| CYC | PF3D7_0521900 | = | 1.49  | 0.99 |
| CYC | PF3D7_1219300 | = | 2.22  | 0.99 |
| CYC | PF3D7_1133700 | = | 0.88  | 0.98 |
| CYC | PF3D7_0808700 | = | 1.07  | 0.95 |
| CYC | PF3D7_1136000 | = | 1.63  | 0.94 |
| CYC | PF3D7_0931000 | = | 1.34  | 0.94 |
| CYC | PF3D7_0830900 | = | 0.76  | 0.84 |
| CYC | PF3D7_1231800 | = | 2.70  | 0.97 |
| CYC | PF3D7_1035800 | = | 0.90  | 0.91 |
| CYC | PF3D7_1444100 | = | 2.75  | 0.97 |
| CYC | PF3D7_1138900 | = | 1.22  | 0.96 |
| CYC | PF3D7_1441800 | = | 0.71  | 0.95 |
| CYC | PF3D7_1345800 | = | 1.17  | 0.98 |
| CYC | PF3D7_1432400 | = | 1.27  | 0.85 |
| CYC | PF3D7_0819800 | = | 0.34  | 0.99 |
| CYC | PF3D7_1207800 | = | 0.10  | 0.92 |
| CYC | PF3D7_1143500 | = | 0.60  | 0.95 |
| CYC | PF3D7_1001600 | = | 0.18  | 0.86 |
| CYC | PF3D7_1019400 | = | 0.92  | 0.93 |
| CYC | PF3D7_1311900 | = | 0.71  | 0.98 |
| CYC | PF3D7_1035700 | = | 1.13  | 0.92 |
| CYC | PF3D7_1103100 | = | 2.05  | 0.99 |
| CYC | PF3D7_0812500 | = | 1.13  | 0.98 |
| CYC | PF3D7_1216100 | = | 1.04  | 0.99 |
| CYC | PF3D7_0206100 | = | 3.10  | 1.00 |
| CYC | PF3D7_1352500 | = | 0.75  | 0.98 |
| CYC | PF3D7_1226900 | = | 3.03  | 0.98 |
| CYC | PF3D7_1368800 | = | 0.26  | 0.95 |
| CYC | PF3D7_1432400 | = | 2.14  | 0.99 |
| CYC | PF3D7_1343900 | = | 0.93  | 0.98 |
| CYC | PF3D7_1328800 | = | 0.81  | 0.99 |

|     |               |   |      |      |
|-----|---------------|---|------|------|
| CYC | PF3D7_1138700 | = | 0.36 | 0.97 |
| CYC | PF3D7_1327100 | = | 0.37 | 0.92 |
| CYC | PF3D7_1136600 | = | 0.39 | 0.94 |
| CYC | PF3D7_0902200 | = | 0.07 | 0.94 |
| CYC | PF3D7_0727100 | = | 0.24 | 0.91 |
| CYC | PF3D7_0105500 | = | 0.21 | 0.97 |
| CYC | PF3D7_1126100 | = | 0.16 | 0.93 |
| CYC | PF3D7_1343700 | = | 0.28 | 0.89 |
| CYC | PF3D7_1330500 | = | 1.00 | 0.99 |
| CYC | PF3D7_1343000 | = | 3.17 | 0.99 |
| CYC | PF3D7_1302000 | = | 2.44 | 0.99 |
| CYC | PF3D7_1107900 | = | 1.86 | 0.98 |
| CYC | PF3D7_0606000 | = | 1.30 | 0.99 |
| CYC | PF3D7_0614500 | = | 1.46 | 1.00 |
| CYC | PF3D7_0203700 | = | 1.64 | 1.00 |
| CYC | PF3D7_0601700 | = | 1.51 | 0.99 |
| CYC | PF3D7_1001900 | = | 1.33 | 0.91 |
| CYC | PF3D7_1409500 | = | 1.18 | 0.89 |
| CYC | PF3D7_0916700 | = | 0.86 | 0.99 |
| CYC | PF3D7_0402000 | = | 0.52 | 0.98 |
| CYC | PF3D7_0102600 | = | 2.74 | 0.86 |
| CYC | PF3D7_1433400 | = | 2.59 | 0.97 |
| CYC | PF3D7_0322000 | = | 1.24 | 0.97 |
| CYC | PF3D7_0623900 | = | 2.03 | 0.98 |
| CYC | PF3D7_1013500 | = | 1.28 | 0.96 |

|        |               |   |        |      |
|--------|---------------|---|--------|------|
| E-PPMP | PF3D7_0811300 | = | 0.31   | 0.93 |
| E-PPMP | PF3D7_1305500 | = | 0.21   | 0.97 |
| E-PPMP | PF3D7_0615900 | = | 0.47   | 0.97 |
| E-PPMP | PF3D7_1122900 | = | 0.20   | 0.99 |
| E-PPMP | PF3D7_1141900 | = | 0.61   | 0.96 |
| E-PPMP | PF3D7_1475600 | = | 0.42   | 0.98 |
| E-PPMP | PF3D7_0211100 | = | 1.59   | 0.94 |
| E-PPMP | PF3D7_0203000 | > | 326 uM |      |
| E-PPMP | PF3D7_0404600 | = | 0.42   | 0.97 |
| E-PPMP | PF3D7_0416500 | = | 2.35   | 0.95 |
| E-PPMP | PF3D7_1018400 | = | 1.11   | 0.91 |
| E-PPMP | PF3D7_0511500 | = | 1.52   | 0.94 |
| E-PPMP | PF3D7_1360200 | = | 0.67   | 0.92 |
| E-PPMP | PF3D7_0611800 | = | 1.51   | 0.98 |
| E-PPMP | PF3D7_0619900 | = | 0.46   | 0.99 |
| E-PPMP | PF3D7_0521900 | = | 1.97   | 0.94 |
| E-PPMP | PF3D7_1219300 | = | 1.34   | 0.97 |
| E-PPMP | PF3D7_1133700 | = | 1.99   | 0.99 |
| E-PPMP | PF3D7_0808700 | = | 0.38   | 0.98 |
| E-PPMP | PF3D7_1136000 | = | 1.16   | 0.99 |
| E-PPMP | PF3D7_0931000 | = | 2.69   | 0.99 |
| E-PPMP | PF3D7_0830900 | = | 2.48   | 0.96 |
| E-PPMP | PF3D7_1231800 | = | 3.71   | 0.97 |
| E-PPMP | PF3D7_1035800 | = | 1.87   | 0.99 |

|        |               |   |       |      |
|--------|---------------|---|-------|------|
| E-PPMP | PF3D7_1444100 | = | 3.78  | 0.96 |
| E-PPMP | PF3D7_1138900 | = | 4.43  | 0.99 |
| E-PPMP | PF3D7_1441800 | = | 0.50  | 0.98 |
| E-PPMP | PF3D7_1345800 | = | 0.58  | 0.99 |
| E-PPMP | PF3D7_1432400 | = | 0.70  | 0.99 |
| E-PPMP | PF3D7_0819800 | = | 0.41  | 1.00 |
| E-PPMP | PF3D7_1207800 | = | 0.84  | 1.00 |
| E-PPMP | PF3D7_1143500 | = | 0.23  | 0.99 |
| E-PPMP | PF3D7_1001600 | = | 0.60  | 1.00 |
| E-PPMP | PF3D7_1019400 | = | 3.93  | 1.00 |
| E-PPMP | PF3D7_1311900 | = | 0.67  | 0.99 |
| E-PPMP | PF3D7_1035700 | = | 0.72  | 1.00 |
| E-PPMP | PF3D7_1103100 | = | 0.36  | 0.95 |
| E-PPMP | PF3D7_0812500 | = | 0.37  | 0.98 |
| E-PPMP | PF3D7_1216100 | = | 0.17  | 0.99 |
| E-PPMP | PF3D7_0206100 | = | 0.40  | 0.97 |
| E-PPMP | PF3D7_1352500 | = | 0.11  | 0.99 |
| E-PPMP | PF3D7_1226900 | = | 0.60  | 0.99 |
| E-PPMP | PF3D7_1368800 | = | 0.30  | 0.99 |
| E-PPMP | PF3D7_1432400 | = | 0.19  | 0.99 |
| E-PPMP | PF3D7_1343900 | = | 0.32  | 0.98 |
| E-PPMP | PF3D7_1328800 | = | 0.37  | 0.96 |
| E-PPMP | PF3D7_1138700 | = | 0.18  | 0.98 |
| E-PPMP | PF3D7_1327100 | = | 0.04  | 0.97 |
| E-PPMP | PF3D7_1136600 | = | 0.17  | 0.98 |
| E-PPMP | PF3D7_0902200 | = | 0.57  | 0.99 |
| E-PPMP | PF3D7_0727100 | = | 0.69  | 0.99 |
| E-PPMP | PF3D7_0105500 | = | 0.04  | 0.97 |
| E-PPMP | PF3D7_1126100 | = | 0.31  | 0.97 |
| E-PPMP | PF3D7_1343700 | = | 0.07  | 0.96 |
| E-PPMP | PF3D7_1330500 | = | 0.98  | 0.98 |
| E-PPMP | PF3D7_1343000 | = | 0.56  | 0.93 |
| E-PPMP | PF3D7_1302000 | = | 1.72  | 0.97 |
| E-PPMP | PF3D7_1107900 | = | 0.31  | 0.95 |
| E-PPMP | PF3D7_0606000 | = | 0.84  | 0.98 |
| E-PPMP | PF3D7_0614500 | = | 0.94  | 0.97 |
| E-PPMP | PF3D7_0203700 | = | 0.49  | 0.91 |
| E-PPMP | PF3D7_0601700 | = | 1.32  | 0.98 |
| E-PPMP | PF3D7_1001900 | = | 0.96  | 0.98 |
| E-PPMP | PF3D7_1409500 | = | 0.11  | 0.99 |
| E-PPMP | PF3D7_0916700 | = | 0.80  | 0.98 |
| E-PPMP | PF3D7_0402000 | = | 0.89  | 0.99 |
| E-PPMP | PF3D7_0102600 | = | 1.13  | 0.99 |
| E-PPMP | PF3D7_1433400 | = | 1.18  | 0.99 |
| E-PPMP | PF3D7_0322000 | = | 1.06  | 0.99 |
| E-PPMP | PF3D7_0623900 | = | 0.97  | 0.98 |
| E-PPMP | PF3D7_1013500 | = | 3.06  | 0.93 |
| T-PPMP | PF3D7_0811300 | = | 90.73 | 0.94 |
| T-PPMP | PF3D7_1305500 | = | 1.45  | 0.95 |

|        |               |   |        |      |
|--------|---------------|---|--------|------|
| T-PPMP | PF3D7_0615900 | = | 38.39  | 0.97 |
| T-PPMP | PF3D7_1122900 | = | 153.41 | 0.98 |
| T-PPMP | PF3D7_1141900 | = | 110.37 | 0.97 |
| T-PPMP | PF3D7_1475600 | = | 68.34  | 0.94 |
| T-PPMP | PF3D7_0211100 | = | 0.39   | 0.90 |
| T-PPMP | PF3D7_0203000 | = | 0.84   | 0.92 |
| T-PPMP | PF3D7_0404600 | = | 5.08   | 0.88 |
| T-PPMP | PF3D7_0416500 | = | 0.91   | 0.98 |
| T-PPMP | PF3D7_1018400 | = | 1.92   | 0.92 |
| T-PPMP | PF3D7_0511500 | = | 7.20   | 0.96 |
| T-PPMP | PF3D7_1360200 | = | 0.81   | 0.96 |
| T-PPMP | PF3D7_0611800 | = | 2.27   | 0.95 |
| T-PPMP | PF3D7_0619900 | = | 0.17   | 0.97 |
| T-PPMP | PF3D7_0521900 | = | 1.74   | 0.96 |
| T-PPMP | PF3D7_1219300 | = | 1.90   | 0.87 |
| T-PPMP | PF3D7_1133700 | = | 2.58   | 0.95 |
| T-PPMP | PF3D7_0808700 | = | 3.32   | 0.98 |
| T-PPMP | PF3D7_1136000 | = | 4.68   | 0.99 |
| T-PPMP | PF3D7_0931000 | = | 9.21   | 0.92 |
| T-PPMP | PF3D7_0830900 | = | 1.31   | 0.88 |
| T-PPMP | PF3D7_1231800 | = | 4.15   | 0.93 |
| T-PPMP | PF3D7_1035800 | = | 2.77   | 0.88 |
| T-PPMP | PF3D7_1444100 | = | 3.56   | 0.91 |
| T-PPMP | PF3D7_1138900 | = | 2.71   | 0.91 |
| T-PPMP | PF3D7_1441800 | = | 0.31   | 0.96 |
| T-PPMP | PF3D7_1345800 | = | 0.12   | 0.88 |
| T-PPMP | PF3D7_1432400 | = | 0.88   | 0.95 |
| T-PPMP | PF3D7_0819800 | = | 0.83   | 0.96 |
| T-PPMP | PF3D7_1207800 | = | 0.44   | 0.81 |
| T-PPMP | PF3D7_1143500 | = | 0.55   | 0.94 |
| T-PPMP | PF3D7_1001600 | = | 0.10   | 0.91 |
| T-PPMP | PF3D7_1019400 | = | 0.75   | 0.99 |
| T-PPMP | PF3D7_1311900 | = | 0.44   | 0.96 |
| T-PPMP | PF3D7_1035700 | = | 0.14   | 0.91 |
| T-PPMP | PF3D7_1103100 | = | 0.16   | 0.87 |
| T-PPMP | PF3D7_0812500 | = | 0.25   | 0.93 |
| T-PPMP | PF3D7_1216100 | = | 10.35  | 0.93 |
| T-PPMP | PF3D7_0206100 | = | 11.43  | 0.89 |
| T-PPMP | PF3D7_1352500 | = | 1.52   | 0.92 |
| T-PPMP | PF3D7_1226900 | = | 4.20   | 0.89 |
| T-PPMP | PF3D7_1368800 | = | 0.49   | 0.91 |
| T-PPMP | PF3D7_1432400 | = | 1.82   | 0.86 |
| T-PPMP | PF3D7_1343900 | = | 17.71  | 0.86 |
| T-PPMP | PF3D7_1328800 | = | 9.88   | 0.87 |
| T-PPMP | PF3D7_1138700 | = | 0.05   | 0.76 |
| T-PPMP | PF3D7_1327100 | = | 0.13   | 0.71 |
| T-PPMP | PF3D7_1136600 | = | 5.66   | 0.90 |
| T-PPMP | PF3D7_0902200 | = | 0.00   | 0.69 |
| T-PPMP | PF3D7_0727100 | = | 0.02   | 0.90 |
| T-PPMP | PF3D7_0105500 | = | 0.03   | 0.76 |
| T-PPMP | PF3D7_1126100 | = | 0.02   | 0.74 |
| T-PPMP | PF3D7_1343700 | = | 0.01   | 0.73 |

|        |               |   |      |      |
|--------|---------------|---|------|------|
| T-PPMP | PF3D7_1330500 | = | 1.09 | 0.95 |
| T-PPMP | PF3D7_1343000 | = | 4.20 | 0.94 |
| T-PPMP | PF3D7_1302000 | = | 1.76 | 0.97 |
| T-PPMP | PF3D7_1107900 | = | 0.94 | 0.99 |
| T-PPMP | PF3D7_0606000 | = | 1.09 | 0.97 |
| T-PPMP | PF3D7_0614500 | = | 1.04 | 0.98 |
| T-PPMP | PF3D7_0203700 | = | 0.87 | 0.90 |
| T-PPMP | PF3D7_0601700 | = | 0.97 | 0.97 |
| T-PPMP | PF3D7_1001900 | = | 1.79 | 0.94 |
| T-PPMP | PF3D7_1409500 | = | 0.65 | 0.98 |
| T-PPMP | PF3D7_0916700 | = | 0.70 | 0.98 |
| T-PPMP | PF3D7_0402000 | = | 0.56 | 0.96 |
| T-PPMP | PF3D7_0102600 | = | 2.34 | 0.98 |
| T-PPMP | PF3D7_1433400 | = | 1.69 | 0.92 |
| T-PPMP | PF3D7_0322000 | = | 1.06 | 0.97 |
| T-PPMP | PF3D7_0623900 | = | 1.26 | 0.98 |
| T-PPMP | PF3D7_1013500 | = | 1.22 | 0.99 |

|    |               |   |       |      |
|----|---------------|---|-------|------|
| CQ | PF3D7_0811300 | = | 0.74  | 0.93 |
| CQ | PF3D7_1305500 | = | 1.07  | 0.98 |
| CQ | PF3D7_0615900 | = | 0.21  | 0.75 |
| CQ | PF3D7_1122900 | = | 0.64  | 0.97 |
| CQ | PF3D7_1141900 | = | 0.56  | 0.99 |
| CQ | PF3D7_1475600 | = | 0.59  | 0.96 |
| CQ | PF3D7_0211100 | = | 0.53  | 0.99 |
| CQ | PF3D7_0203000 | = | 0.55  | 0.99 |
| CQ | PF3D7_0404600 | = | 1.00  | 0.97 |
| CQ | PF3D7_0416500 | = | 0.83  | 0.95 |
| CQ | PF3D7_1018400 | = | 0.93  | 0.97 |
| CQ | PF3D7_0511500 | = | 30.77 | 0.96 |
| CQ | PF3D7_1360200 | = | 0.88  | 0.96 |
| CQ | PF3D7_0611800 | = | 1.31  | 0.99 |
| CQ | PF3D7_0619900 | = | 1.24  | 0.91 |
| CQ | PF3D7_0521900 | = | 1.69  | 0.97 |
| CQ | PF3D7_1219300 | = | 1.14  | 1.00 |
| CQ | PF3D7_1133700 | = | 1.25  | 0.96 |
| CQ | PF3D7_0808700 | = | 4.11  | 1.00 |
| CQ | PF3D7_1136000 | = | 0.44  | 0.71 |
| CQ | PF3D7_0931000 | = | 2.45  | 0.94 |
| CQ | PF3D7_0830900 | = | 1.96  | 0.91 |
| CQ | PF3D7_1231800 | = | 3.37  | 0.87 |
| CQ | PF3D7_1035800 | = | 7.21  | 0.88 |
| CQ | PF3D7_1444100 | = | 16.02 | 1.00 |
| CQ | PF3D7_1138900 | = | 1.00  | 0.99 |
| CQ | PF3D7_1441800 | = | 0.98  | 0.98 |
| CQ | PF3D7_1345800 | = | 0.69  | 0.99 |
| CQ | PF3D7_1432400 | = | 0.64  | 0.98 |
| CQ | PF3D7_0819800 | = | 0.80  | 0.94 |
| CQ | PF3D7_1207800 | = | 1.03  | 1.00 |
| CQ | PF3D7_1143500 | = | 16.76 | 1.00 |

|    |               |   |      |      |
|----|---------------|---|------|------|
| CQ | PF3D7_1001600 | = | 0.53 | 0.97 |
| CQ | PF3D7_1019400 | = | 0.28 | 0.98 |
| CQ | PF3D7_1311900 | = | 0.81 | 0.99 |
| CQ | PF3D7_1035700 | = | 0.68 | 0.99 |
| CQ | PF3D7_1103100 | = | 0.82 | 0.97 |
| CQ | PF3D7_0812500 | = | 0.19 | 0.95 |
| CQ | PF3D7_1216100 | = | 7.17 | 0.97 |
| CQ | PF3D7_0206100 | = | 0.19 | 0.97 |
| CQ | PF3D7_1352500 | = | 0.45 | 0.99 |
| CQ | PF3D7_1226900 | = | 0.61 | 0.99 |
| CQ | PF3D7_1368800 | = | 0.54 | 0.97 |
| CQ | PF3D7_1432400 | = | 1.08 | 0.99 |
| CQ | PF3D7_1343900 | = | 1.00 | 0.91 |
| CQ | PF3D7_1328800 | = | 0.18 | 0.90 |
| CQ | PF3D7_1138700 | = | 0.83 | 0.93 |
| CQ | PF3D7_1327100 | = | 1.00 | 0.94 |
| CQ | PF3D7_1136600 | = | 0.83 | 0.91 |
| CQ | PF3D7_0902200 | = | 1.00 | 0.87 |
| CQ | PF3D7_0727100 | = | 0.67 | 1.00 |
| CQ | PF3D7_0105500 | = | 0.83 | 0.91 |
| CQ | PF3D7_1126100 | = | 0.83 | 0.93 |
| CQ | PF3D7_1343700 | = | 0.83 | 0.94 |
| CQ | PF3D7_1330500 | = | 0.88 | 0.99 |
| CQ | PF3D7_1343000 | = | 2.59 | 0.99 |
| CQ | PF3D7_1302000 | = | 1.91 | 0.99 |
| CQ | PF3D7_1107900 | = | 2.61 | 1.00 |
| CQ | PF3D7_0606000 | = | 2.59 | 0.99 |
| CQ | PF3D7_0614500 | = | 0.95 | 0.97 |
| CQ | PF3D7_0203700 | = | 2.59 | 1.00 |
| CQ | PF3D7_0601700 | = | 2.00 | 0.99 |
| CQ | PF3D7_1001900 | = | 1.01 | 0.98 |
| CQ | PF3D7_1409500 | = | 1.01 | 0.99 |
| CQ | PF3D7_0916700 | = | 0.31 | 0.78 |
| CQ | PF3D7_0402000 | = | 0.55 | 0.98 |
| CQ | PF3D7_0102600 | = | 0.56 | 0.93 |
| CQ | PF3D7_1433400 | = | 1.00 | 0.99 |
| CQ | PF3D7_0322000 | = | 1.05 | 0.99 |
| CQ | PF3D7_0623900 | = | 0.98 | 0.99 |
| CQ | PF3D7_1013500 | = | 0.08 | 0.99 |

|    |               |   |       |      |
|----|---------------|---|-------|------|
| PQ | PF3D7_0811300 | = | 0.38  | 0.97 |
| PQ | PF3D7_1305500 | = | 0.38  | 0.99 |
| PQ | PF3D7_0615900 | = | 0.62  | 0.96 |
| PQ | PF3D7_1122900 | = | 0.31  | 0.98 |
| PQ | PF3D7_1141900 | = | 1.22  | 1.00 |
| PQ | PF3D7_1475600 | = | 23.54 | 0.93 |
| PQ | PF3D7_0211100 | = | 0.36  | 1.00 |
| PQ | PF3D7_0203000 | = | 1.06  | 0.98 |
| PQ | PF3D7_0404600 | = | 0.08  | 0.98 |
| PQ | PF3D7_0416500 | = | 1.39  | 0.99 |

|    |               |   |      |      |
|----|---------------|---|------|------|
| PQ | PF3D7_1018400 | = | 1.17 | 0.99 |
| PQ | PF3D7_0511500 | = | 0.89 | 0.98 |
| PQ | PF3D7_1360200 | = | 1.11 | 0.99 |
| PQ | PF3D7_0611800 | = | 1.27 | 0.98 |
| PQ | PF3D7_0619900 | = | 0.26 | 0.97 |
| PQ | PF3D7_0521900 | = | 1.36 | 0.96 |
| PQ | PF3D7_1219300 | = | 1.31 | 0.99 |
| PQ | PF3D7_1133700 | = | 0.93 | 0.89 |
| PQ | PF3D7_0808700 | = | 3.18 | 0.98 |
| PQ | PF3D7_1136000 | = | 1.65 | 0.95 |
| PQ | PF3D7_0931000 | = | 1.79 | 0.93 |
| PQ | PF3D7_0830900 | = | 0.47 | 0.96 |
| PQ | PF3D7_1231800 | = | 1.96 | 0.97 |
| PQ | PF3D7_1035800 | = | 2.14 | 0.92 |
| PQ | PF3D7_1444100 | = | 2.59 | 0.98 |
| PQ | PF3D7_1138900 | = | 0.49 | 0.84 |
| PQ | PF3D7_1441800 | = | 0.81 | 1.00 |
| PQ | PF3D7_1345800 | = | 1.06 | 0.99 |
| PQ | PF3D7_1432400 | = | 0.71 | 0.99 |
| PQ | PF3D7_0819800 | = | 0.87 | 1.00 |
| PQ | PF3D7_1207800 | = | 0.76 | 1.00 |
| PQ | PF3D7_1143500 | = | 0.67 | 1.00 |
| PQ | PF3D7_1001600 | = | 0.68 | 1.00 |
| PQ | PF3D7_1019400 | = | 0.19 | 0.97 |
| PQ | PF3D7_1311900 | = | 0.45 | 0.97 |
| PQ | PF3D7_1035700 | = | 0.74 | 0.98 |
| PQ | PF3D7_1103100 | = | 1.60 | 0.99 |
| PQ | PF3D7_0812500 | = | 1.67 | 0.96 |
| PQ | PF3D7_1216100 | = | 0.49 | 0.99 |
| PQ | PF3D7_0206100 | = | 0.49 | 0.98 |
| PQ | PF3D7_1352500 | = | 0.81 | 0.99 |
| PQ | PF3D7_1226900 | = | 1.25 | 0.99 |
| PQ | PF3D7_1368800 | = | 0.62 | 0.99 |
| PQ | PF3D7_1432400 | = | 1.65 | 0.98 |
| PQ | PF3D7_1343900 | = | 1.00 | 0.94 |
| PQ | PF3D7_1328800 | = | 0.50 | 0.99 |
| PQ | PF3D7_1138700 | = | 0.25 | 0.99 |
| PQ | PF3D7_1327100 | = | 0.24 | 0.99 |
| PQ | PF3D7_1136600 | = | 0.24 | 0.99 |
| PQ | PF3D7_0902200 | = | 0.16 | 0.99 |
| PQ | PF3D7_0727100 | = | 0.05 | 0.99 |
| PQ | PF3D7_0105500 | = | 0.22 | 0.99 |
| PQ | PF3D7_1126100 | = | 0.19 | 0.99 |
| PQ | PF3D7_1343700 | = | 0.21 | 1.00 |
| PQ | PF3D7_1330500 | = | 0.91 | 0.98 |
| PQ | PF3D7_1343000 | = | 2.18 | 0.99 |
| PQ | PF3D7_1302000 | = | 1.56 | 0.99 |
| PQ | PF3D7_1107900 | = | 0.84 | 0.98 |
| PQ | PF3D7_0606000 | = | 0.70 | 0.99 |
| PQ | PF3D7_0614500 | = | 0.83 | 0.99 |
| PQ | PF3D7_0203700 | = | 1.00 | 0.99 |
| PQ | PF3D7_0601700 | = | 0.91 | 0.99 |

|    |               |   |      |      |
|----|---------------|---|------|------|
| PQ | PF3D7_1001900 | = | 0.67 | 0.99 |
| PQ | PF3D7_1409500 | = | 0.59 | 0.99 |
| PQ | PF3D7_0916700 | = | 0.19 | 0.88 |
| PQ | PF3D7_0402000 | = | 0.25 | 1.00 |
| PQ | PF3D7_0102600 | = | 1.39 | 0.96 |
| PQ | PF3D7_1433400 | = | 1.11 | 0.97 |
| PQ | PF3D7_0322000 | = | 1.44 | 0.97 |
| PQ | PF3D7_0623900 | = | 1.31 | 0.99 |
| PQ | PF3D7_1013500 | = | 0.09 | 0.97 |

|      |               |   |      |      |
|------|---------------|---|------|------|
| E-64 | PF3D7_0811300 | = | 0.03 | 0.99 |
| E-64 | PF3D7_1305500 | = | 1.29 | 0.98 |
| E-64 | PF3D7_0615900 | = | 0.42 | 0.91 |
| E-64 | PF3D7_1122900 | = | 0.91 | 0.95 |
| E-64 | PF3D7_1141900 | = | 0.84 | 0.89 |
| E-64 | PF3D7_1475600 | = | 0.47 | 0.96 |
| E-64 | PF3D7_0211100 | = | 0.53 | 0.96 |
| E-64 | PF3D7_0203000 | = | 0.49 | 0.93 |
| E-64 | PF3D7_0404600 | = | 1.95 | 0.98 |
| E-64 | PF3D7_0416500 | = | 1.21 | 0.97 |
| E-64 | PF3D7_1018400 | = | 2.57 | 0.96 |
| E-64 | PF3D7_0511500 | = | 1.82 | 0.99 |
| E-64 | PF3D7_1360200 | = | 2.31 | 0.96 |
| E-64 | PF3D7_0611800 | = | 1.52 | 0.95 |
| E-64 | PF3D7_0619900 | = | 1.24 | 0.97 |
| E-64 | PF3D7_0521900 | = | 2.30 | 0.96 |
| E-64 | PF3D7_1219300 | = | 3.80 | 0.97 |
| E-64 | PF3D7_1133700 | = | 6.27 | 0.95 |
| E-64 | PF3D7_0808700 | = | 3.80 | 0.97 |
| E-64 | PF3D7_1136000 | = | 4.48 | 0.99 |
| E-64 | PF3D7_0931000 | = | 3.95 | 0.93 |
| E-64 | PF3D7_0830900 | = | 1.32 | 0.88 |
| E-64 | PF3D7_1231800 | = | 5.64 | 0.89 |
| E-64 | PF3D7_1035800 | = | 4.37 | 0.93 |
| E-64 | PF3D7_1444100 | = | 1.58 | 0.92 |
| E-64 | PF3D7_1138900 | = | 2.69 | 0.90 |
| E-64 | PF3D7_1441800 | = | 1.07 | 0.97 |
| E-64 | PF3D7_1345800 | = | 0.46 | 0.88 |
| E-64 | PF3D7_1432400 | = | 2.08 | 0.96 |
| E-64 | PF3D7_0819800 | = | 0.89 | 0.95 |
| E-64 | PF3D7_1207800 | = | 0.11 | 0.91 |
| E-64 | PF3D7_1143500 | = | 0.89 | 0.93 |
| E-64 | PF3D7_1001600 | = | 0.64 | 0.89 |
| E-64 | PF3D7_1019400 | = | 1.00 | 0.97 |
| E-64 | PF3D7_1311900 | = | 1.21 | 0.98 |
| E-64 | PF3D7_1035700 | = | 1.37 | 0.97 |
| E-64 | PF3D7_1103100 | = | 1.95 | 0.99 |
| E-64 | PF3D7_0812500 | = | 1.17 | 0.99 |
| E-64 | PF3D7_1216100 | = | 1.28 | 0.92 |
| E-64 | PF3D7_0206100 | = | 0.85 | 0.98 |



|      |               |   |       |      |
|------|---------------|---|-------|------|
| E-64 | PF3D7_1352500 | = | 0.84  | 0.90 |
| E-64 | PF3D7_1226900 | = | 1.10  | 0.96 |
| E-64 | PF3D7_1368800 | = | 0.65  | 0.98 |
| E-64 | PF3D7_1432400 | = | 1.47  | 0.98 |
| E-64 | PF3D7_1343900 | = | 1.03  | 0.95 |
| E-64 | PF3D7_1328800 | = | 0.44  | 0.87 |
| E-64 | PF3D7_1138700 | = | 0.27  | 0.88 |
| E-64 | PF3D7_1327100 | = | 0.19  | 0.86 |
| E-64 | PF3D7_1136600 | = | 0.21  | 0.91 |
| E-64 | PF3D7_0902200 | = | 0.14  | 0.91 |
| E-64 | PF3D7_0727100 | = | 0.17  | 0.88 |
| E-64 | PF3D7_0105500 | = | 0.63  | 0.93 |
| E-64 | PF3D7_1126100 | = | 0.13  | 0.91 |
| E-64 | PF3D7_1343700 | = | 0.14  | 0.90 |
| E-64 | PF3D7_1330500 | = | 1.14  | 0.98 |
| E-64 | PF3D7_1343000 | = | 3.98  | 0.96 |
| E-64 | PF3D7_1302000 | = | 1.61  | 0.97 |
| E-64 | PF3D7_1107900 | = | 1.16  | 0.96 |
| E-64 | PF3D7_0606000 | = | 1.55  | 0.98 |
| E-64 | PF3D7_0614500 | = | 1.16  | 0.97 |
| E-64 | PF3D7_0203700 | = | 0.73  | 0.96 |
| E-64 | PF3D7_0601700 | = | 1.48  | 0.97 |
| E-64 | PF3D7_1001900 | = | 1.94  | 0.87 |
| E-64 | PF3D7_1409500 | = | 1.04  | 0.90 |
| E-64 | PF3D7_0916700 | = | 0.59  | 0.90 |
| E-64 | PF3D7_0402000 | = | 0.41  | 0.89 |
| E-64 | PF3D7_0102600 | = | 3.29  | 0.91 |
| E-64 | PF3D7_1433400 | = | 5.64  | 0.89 |
| E-64 | PF3D7_0322000 | = | 1.18  | 0.90 |
| E-64 | PF3D7_0623900 | = | 1.52  | 0.89 |
| E-64 | PF3D7_1013500 | = | 13.79 | 0.92 |

|       |               |   |      |      |
|-------|---------------|---|------|------|
| PEP-A | PF3D7_0811300 | = | 0.95 | 0.97 |
| PEP-A | PF3D7_1305500 | = | 0.98 | 0.98 |
| PEP-A | PF3D7_0615900 | = | 0.93 | 0.93 |
| PEP-A | PF3D7_1122900 | = | 0.62 | 0.97 |
| PEP-A | PF3D7_1141900 | = | 0.54 | 0.91 |
| PEP-A | PF3D7_1475600 | = | 4.07 | 0.83 |
| PEP-A | PF3D7_0211100 | = | 0.64 | 0.96 |
| PEP-A | PF3D7_0203000 | = | 0.20 | 0.92 |
| PEP-A | PF3D7_0404600 | = | 1.86 | 0.94 |
| PEP-A | PF3D7_0416500 | = | 0.83 | 0.97 |
| PEP-A | PF3D7_1018400 | = | 1.01 | 1.00 |
| PEP-A | PF3D7_0511500 | = | 1.12 | 0.99 |
| PEP-A | PF3D7_1360200 | = | 0.83 | 0.99 |
| PEP-A | PF3D7_0611800 | = | 0.82 | 0.98 |
| PEP-A | PF3D7_0619900 | = | 0.15 | 0.95 |
| PEP-A | PF3D7_0521900 | = | 1.10 | 0.97 |
| PEP-A | PF3D7_1219300 | = | 0.95 | 0.99 |
| PEP-A | PF3D7_1133700 | = | 1.34 | 0.92 |

|       |               |   |        |      |
|-------|---------------|---|--------|------|
| PEP-A | PF3D7_0808700 | = | 2.51   | 1.00 |
| PEP-A | PF3D7_1136000 | = | 1.68   | 0.99 |
| PEP-A | PF3D7_0931000 | = | 2.21   | 0.97 |
| PEP-A | PF3D7_0830900 | = | 1.23   | 0.97 |
| PEP-A | PF3D7_1231800 | = | 107.02 | 0.96 |
| PEP-A | PF3D7_1035800 | = | 3.69   | 0.97 |
| PEP-A | PF3D7_1444100 | = | 3.62   | 0.99 |
| PEP-A | PF3D7_1138900 | = | 1.71   | 0.96 |
| PEP-A | PF3D7_1441800 | = | 0.53   | 0.99 |
| PEP-A | PF3D7_1345800 | = | 0.46   | 1.00 |
| PEP-A | PF3D7_1432400 | = | 1.32   | 1.00 |
| PEP-A | PF3D7_0819800 | = | 1.15   | 0.99 |
| PEP-A | PF3D7_1207800 | = | 0.81   | 1.00 |
| PEP-A | PF3D7_1143500 | = | 0.98   | 1.00 |
| PEP-A | PF3D7_1001600 | = | 0.38   | 1.00 |
| PEP-A | PF3D7_1019400 | = | 0.16   | 0.92 |
| PEP-A | PF3D7_1311900 | = | 1.08   | 0.99 |
| PEP-A | PF3D7_1035700 | = | 0.90   | 1.00 |
| PEP-A | PF3D7_1103100 | = | 1.52   | 0.96 |
| PEP-A | PF3D7_0812500 | = | 1.20   | 0.99 |
| PEP-A | PF3D7_1216100 | = | 1.09   | 0.96 |
| PEP-A | PF3D7_0206100 | = | 0.37   | 0.96 |
| PEP-A | PF3D7_1352500 | = | 7.16   | 0.99 |
| PEP-A | PF3D7_1226900 | = | 0.95   | 0.93 |
| PEP-A | PF3D7_1368800 | = | 0.45   | 0.99 |
| PEP-A | PF3D7_1432400 | = | 1.19   | 0.93 |
| PEP-A | PF3D7_1343900 | = | 0.10   | 0.93 |
| PEP-A | PF3D7_1328800 | = | 0.29   | 0.89 |
| PEP-A | PF3D7_1138700 | = | 0.75   | 0.96 |
| PEP-A | PF3D7_1327100 | = | 0.45   | 0.98 |
| PEP-A | PF3D7_1136600 | = | 0.58   | 0.99 |
| PEP-A | PF3D7_0902200 | = | 0.37   | 0.98 |
| PEP-A | PF3D7_0727100 | = | 0.11   | 0.99 |
| PEP-A | PF3D7_0105500 | = | 0.46   | 1.00 |
| PEP-A | PF3D7_1126100 | = | 0.13   | 0.94 |
| PEP-A | PF3D7_1343700 | = | 0.24   | 0.99 |
| PEP-A | PF3D7_1330500 | = | 1.67   | 0.99 |
| PEP-A | PF3D7_1343000 | = | 2.57   | 0.99 |
| PEP-A | PF3D7_1302000 | = | 2.00   | 0.99 |
| PEP-A | PF3D7_1107900 | = | 1.68   | 1.00 |
| PEP-A | PF3D7_0606000 | = | 1.73   | 0.98 |
| PEP-A | PF3D7_0614500 | = | 0.87   | 0.97 |
| PEP-A | PF3D7_0203700 | = | 1.53   | 0.98 |
| PEP-A | PF3D7_0601700 | = | 1.42   | 0.98 |
| PEP-A | PF3D7_1001900 | = | 1.38   | 1.00 |
| PEP-A | PF3D7_1409500 | = | 1.07   | 0.99 |
| PEP-A | PF3D7_0916700 | = | 0.37   | 0.95 |
| PEP-A | PF3D7_0402000 | = | 0.47   | 1.00 |
| PEP-A | PF3D7_0102600 | = | 1.34   | 0.95 |
| PEP-A | PF3D7_1433400 | = | 0.60   | 0.97 |
| PEP-A | PF3D7_0322000 | = | 1.37   | 0.98 |
| PEP-A | PF3D7_0623900 | = | 1.08   | 0.98 |

|       |               |   |      |      |
|-------|---------------|---|------|------|
| PEP-A | PF3D7_1013500 | = | 0.01 | 0.68 |
| SF    | PF3D7_0811300 | = | 0.71 | 0.95 |
| SF    | PF3D7_1305500 | = | 0.35 | 0.99 |
| SF    | PF3D7_0615900 | = | 0.15 | 0.86 |
| SF    | PF3D7_1122900 | = | 0.36 | 0.98 |
| SF    | PF3D7_1141900 | = | 1.40 | 0.97 |
| SF    | PF3D7_1475600 | = | 0.25 | 0.98 |
| SF    | PF3D7_0211100 | = | 0.96 | 0.96 |
| SF    | PF3D7_0203000 | = | 1.00 | 1.00 |
| SF    | PF3D7_0404600 | = | 1.00 | 0.86 |
| SF    | PF3D7_0416500 | = | 1.34 | 0.96 |
| SF    | PF3D7_1018400 | = | 1.66 | 0.99 |
| SF    | PF3D7_0511500 | = | 0.79 | 0.99 |
| SF    | PF3D7_1360200 | = | 1.18 | 1.00 |
| SF    | PF3D7_0611800 | = | 1.03 | 0.98 |
| SF    | PF3D7_0619900 | = | 0.87 | 0.96 |
| SF    | PF3D7_0521900 | = | 0.98 | 0.97 |
| SF    | PF3D7_1219300 | = | 1.16 | 0.96 |
| SF    | PF3D7_1133700 | = | 1.32 | 0.98 |
| SF    | PF3D7_0808700 | = | 2.22 | 0.98 |
| SF    | PF3D7_1136000 | = | 1.54 | 0.99 |
| SF    | PF3D7_0931000 | = | 1.79 | 0.96 |
| SF    | PF3D7_0830900 | = | 1.20 | 0.99 |
| SF    | PF3D7_1231800 | = | 1.97 | 0.99 |
| SF    | PF3D7_1035800 | = | 1.78 | 0.96 |
| SF    | PF3D7_1444100 | = | 1.85 | 0.98 |
| SF    | PF3D7_1138900 | = | 1.45 | 0.93 |
| SF    | PF3D7_1441800 | = | 1.16 | 0.99 |
| SF    | PF3D7_1345800 | = | 1.20 | 0.99 |
| SF    | PF3D7_1432400 | = | 1.44 | 0.98 |
| SF    | PF3D7_0819800 | = | 1.00 | 0.98 |
| SF    | PF3D7_1207800 | = | 0.98 | 0.99 |
| SF    | PF3D7_1143500 | = | 0.39 | 0.99 |
| SF    | PF3D7_1001600 | = | 0.90 | 0.99 |
| SF    | PF3D7_1019400 | = | 0.67 | 0.98 |
| SF    | PF3D7_1311900 | = | 1.38 | 0.93 |
| SF    | PF3D7_1035700 | = | 0.95 | 0.99 |
| SF    | PF3D7_1103100 | = | 2.00 | 0.99 |
| SF    | PF3D7_0812500 | = | 3.74 | 0.99 |
| SF    | PF3D7_1216100 | = | 0.92 | 0.99 |
| SF    | PF3D7_0206100 | = | 0.91 | 0.97 |
| SF    | PF3D7_1352500 | = | 1.13 | 0.99 |
| SF    | PF3D7_1226900 | = | 2.07 | 0.99 |
| SF    | PF3D7_1368800 | = | 0.69 | 0.98 |
| SF    | PF3D7_1432400 | = | 1.36 | 0.97 |
| SF    | PF3D7_1343900 | = | 0.37 | 0.98 |
| SF    | PF3D7_1328800 | = | 0.82 | 0.97 |
| SF    | PF3D7_1138700 | = | 0.38 | 0.97 |
| SF    | PF3D7_1327100 | = | 0.37 | 0.97 |
| SF    | PF3D7_1136600 | = | 0.39 | 0.98 |

|    |               |   |      |      |
|----|---------------|---|------|------|
| SF | PF3D7_0902200 | = | 0.41 | 0.99 |
| SF | PF3D7_0727100 | = | 0.14 | 0.88 |
| SF | PF3D7_0105500 | = | 0.64 | 0.97 |
| SF | PF3D7_1126100 | = | 0.37 | 0.95 |
| SF | PF3D7_1343700 | = | 0.21 | 0.92 |
| SF | PF3D7_1330500 | = | 1.27 | 0.99 |
| SF | PF3D7_1343000 | = | 1.73 | 0.99 |
| SF | PF3D7_1302000 | = | 1.39 | 0.98 |
| SF | PF3D7_1107900 | = | 1.21 | 0.99 |
| SF | PF3D7_0606000 | = | 1.82 | 0.99 |
| SF | PF3D7_0614500 | = | 0.98 | 0.99 |
| SF | PF3D7_0203700 | = | 1.05 | 1.00 |
| SF | PF3D7_0601700 | = | 1.65 | 0.98 |
| SF | PF3D7_1001900 | = | 0.80 | 0.96 |
| SF | PF3D7_1409500 | = | 0.55 | 0.99 |
| SF | PF3D7_0916700 | = | 0.30 | 0.94 |
| SF | PF3D7_0402000 | = | 0.75 | 0.99 |
| SF | PF3D7_0102600 | = | 1.36 | 0.97 |
| SF | PF3D7_1433400 | = | 1.37 | 0.98 |
| SF | PF3D7_0322000 | = | 1.38 | 0.99 |
| SF | PF3D7_0623900 | = | 1.17 | 0.98 |
| SF | PF3D7_1013500 | = | 0.32 | 0.99 |

|      |               |   |      |      |
|------|---------------|---|------|------|
| CYTD | PF3D7_0811300 | = | 1.41 | 0.94 |
| CYTD | PF3D7_1305500 | = | 0.68 | 0.96 |
| CYTD | PF3D7_0615900 | = | 0.98 | 0.94 |
| CYTD | PF3D7_1122900 | = | 0.55 | 0.49 |
| CYTD | PF3D7_1141900 | = | 2.71 | 0.97 |
| CYTD | PF3D7_1475600 | = | 1.37 | 0.93 |
| CYTD | PF3D7_0211100 | = | 2.53 | 0.94 |
| CYTD | PF3D7_0203000 | = | 1.00 | 0.95 |
| CYTD | PF3D7_0404600 | = | 1.66 | 0.95 |
| CYTD | PF3D7_0416500 | = | 0.55 | 0.96 |
| CYTD | PF3D7_1018400 | = | 0.40 | 0.92 |
| CYTD | PF3D7_0511500 | = | 1.15 | 0.98 |
| CYTD | PF3D7_1360200 | = | 0.65 | 0.88 |
| CYTD | PF3D7_0611800 | = | 0.60 | 0.96 |
| CYTD | PF3D7_0619900 | = | 0.71 | 0.99 |
| CYTD | PF3D7_0521900 | = | 0.88 | 0.91 |
| CYTD | PF3D7_1219300 | = | 0.46 | 0.96 |
| CYTD | PF3D7_1133700 | = | 1.89 | 0.91 |
| CYTD | PF3D7_0808700 | = | 0.61 | 0.95 |
| CYTD | PF3D7_1136000 | = | 1.03 | 0.93 |
| CYTD | PF3D7_0931000 | = | 2.09 | 0.96 |
| CYTD | PF3D7_0830900 | = | 1.31 | 0.92 |
| CYTD | PF3D7_1231800 | = | 4.54 | 0.95 |
| CYTD | PF3D7_1035800 | = | 2.68 | 0.97 |
| CYTD | PF3D7_1444100 | = | 1.33 | 0.94 |
| CYTD | PF3D7_1138900 | = | 8.72 | 0.96 |
| CYTD | PF3D7_1441800 | = | 0.21 | 0.97 |

|      |               |   |      |      |
|------|---------------|---|------|------|
| CYTD | PF3D7_1345800 | = | 0.28 | 0.98 |
| CYTD | PF3D7_1432400 | = | 1.70 | 0.98 |
| CYTD | PF3D7_0819800 | = | 0.27 | 0.98 |
| CYTD | PF3D7_1207800 | = | 0.41 | 0.97 |
| CYTD | PF3D7_1143500 | = | 0.16 | 0.97 |
| CYTD | PF3D7_1001600 | = | 0.17 | 0.97 |
| CYTD | PF3D7_1019400 | = | 7.50 | 1.00 |
| CYTD | PF3D7_1311900 | = | 0.14 | 0.97 |
| CYTD | PF3D7_1035700 | = | 0.24 | 0.97 |
| CYTD | PF3D7_1103100 | = | 0.07 | 0.96 |
| CYTD | PF3D7_0812500 | = | 0.19 | 0.96 |
| CYTD | PF3D7_1216100 | = | 0.06 | 0.95 |
| CYTD | PF3D7_0206100 | = | 0.67 | 0.95 |
| CYTD | PF3D7_1352500 | = | 0.09 | 0.85 |
| CYTD | PF3D7_1226900 | = | 0.01 | 0.95 |
| CYTD | PF3D7_1368800 | = | 0.58 | 0.96 |
| CYTD | PF3D7_1432400 | = | 0.12 | 0.98 |
| CYTD | PF3D7_1343900 | = | 0.10 | 0.98 |
| CYTD | PF3D7_1328800 | = | 0.70 | 0.87 |
| CYTD | PF3D7_1138700 | = | 0.10 | 0.97 |
| CYTD | PF3D7_1327100 | = | 0.04 | 0.97 |
| CYTD | PF3D7_1136600 | = | 0.06 | 0.96 |
| CYTD | PF3D7_0902200 | = | 0.39 | 0.97 |
| CYTD | PF3D7_0727100 | = | 0.77 | 0.98 |
| CYTD | PF3D7_0105500 | = | 0.08 | 0.97 |
| CYTD | PF3D7_1126100 | = | 0.08 | 0.96 |
| CYTD | PF3D7_1343700 | = | 0.08 | 0.97 |
| CYTD | PF3D7_1330500 | = | 3.39 | 0.97 |
| CYTD | PF3D7_1343000 | = | 0.67 | 0.96 |
| CYTD | PF3D7_1302000 | = | 1.33 | 0.96 |
| CYTD | PF3D7_1107900 | = | 0.39 | 0.91 |
| CYTD | PF3D7_0606000 | = | 2.17 | 0.96 |
| CYTD | PF3D7_0614500 | = | 1.94 | 0.95 |
| CYTD | PF3D7_0203700 | = | 1.89 | 0.92 |
| CYTD | PF3D7_0601700 | = | 2.44 | 0.96 |
| CYTD | PF3D7_1001900 | = | 0.77 | 0.98 |
| CYTD | PF3D7_1409500 | = | 0.74 | 0.98 |
| CYTD | PF3D7_0916700 | = | 1.00 | 0.98 |
| CYTD | PF3D7_0402000 | = | 1.62 | 0.96 |
| CYTD | PF3D7_0102600 | = | 1.15 | 0.96 |
| CYTD | PF3D7_1433400 | = | 1.26 | 0.97 |
| CYTD | PF3D7_0322000 | = | 2.26 | 0.97 |
| CYTD | PF3D7_0623900 | = | 1.19 | 0.99 |
| CYTD | PF3D7_1013500 | = | 1.92 | 0.99 |
|      |               |   |      |      |
| BZD  | PF3D7_0811300 | = | 0.34 | 0.96 |
| BZD  | PF3D7_1305500 | = | 0.55 | 0.99 |
| BZD  | PF3D7_0615900 | = | 0.60 | 0.98 |
| BZD  | PF3D7_1122900 | = | 0.47 | 0.94 |
| BZD  | PF3D7_1141900 | = | 0.86 | 0.98 |
| BZD  | PF3D7_1475600 | = | 0.39 | 0.99 |

|     |               |   |          |      |
|-----|---------------|---|----------|------|
| BZD | PF3D7_0211100 | > | 42325 uM |      |
| BZD | PF3D7_0203000 | = | 0.55     | 0.99 |
| BZD | PF3D7_0404600 | = | 1.00     | 0.92 |
| BZD | PF3D7_0416500 | = | 1.68     | 0.96 |
| BZD | PF3D7_1018400 | = | 1.91     | 0.99 |
| BZD | PF3D7_0511500 | = | 2.16     | 0.96 |
| BZD | PF3D7_1360200 | = | 1.59     | 0.95 |
| BZD | PF3D7_0611800 | = | 1.61     | 0.99 |
| BZD | PF3D7_0619900 | = | 1.70     | 0.98 |
| BZD | PF3D7_0521900 | = | 1.34     | 0.96 |
| BZD | PF3D7_1219300 | = | 2.13     | 0.99 |
| BZD | PF3D7_1133700 | = | 0.64     | 0.96 |
| BZD | PF3D7_0808700 | = | 1.56     | 0.96 |
| BZD | PF3D7_1136000 | = | 1.00     | 0.94 |
| BZD | PF3D7_0931000 | = | 1.57     | 0.96 |
| BZD | PF3D7_0830900 | = | 0.78     | 0.93 |
| BZD | PF3D7_1231800 | = | 3.23     | 0.96 |
| BZD | PF3D7_1035800 | = | 1.94     | 0.97 |
| BZD | PF3D7_1444100 | = | 1.82     | 0.92 |
| BZD | PF3D7_1138900 | = | 1.17     | 0.97 |
| BZD | PF3D7_1441800 | = | 0.83     | 0.99 |
| BZD | PF3D7_1345800 | = | 0.83     | 0.99 |
| BZD | PF3D7_1432400 | = | 1.28     | 1.00 |
| BZD | PF3D7_0819800 | = | 1.12     | 0.97 |
| BZD | PF3D7_1207800 | = | 1.03     | 0.99 |
| BZD | PF3D7_1143500 | = | 0.82     | 1.00 |
| BZD | PF3D7_1001600 | = | 0.71     | 0.99 |
| BZD | PF3D7_1019400 | = | 0.39     | 0.98 |
| BZD | PF3D7_1311900 | = | 0.68     | 0.99 |
| BZD | PF3D7_1035700 | = | 0.64     | 0.99 |
| BZD | PF3D7_1103100 | = | 1.68     | 0.97 |
| BZD | PF3D7_0812500 | = | 0.36     | 1.00 |
| BZD | PF3D7_1216100 | = | 1.25     | 0.97 |
| BZD | PF3D7_0206100 | = | 0.71     | 0.99 |
| BZD | PF3D7_1352500 | = | 0.88     | 0.96 |
| BZD | PF3D7_1226900 | = | 1.28     | 0.98 |
| BZD | PF3D7_1368800 | = | 0.56     | 0.99 |
| BZD | PF3D7_1432400 | = | 1.65     | 0.96 |
| BZD | PF3D7_1343900 | = | 0.83     | 0.93 |
| BZD | PF3D7_1328800 | = | 0.25     | 0.94 |
| BZD | PF3D7_1138700 | = | 0.22     | 0.99 |
| BZD | PF3D7_1327100 | = | 0.41     | 0.99 |
| BZD | PF3D7_1136600 | = | 0.26     | 0.99 |
| BZD | PF3D7_0902200 | = | 0.36     | 1.00 |
| BZD | PF3D7_0727100 | = | 0.21     | 1.00 |
| BZD | PF3D7_0105500 | = | 1.00     | 1.00 |
| BZD | PF3D7_1126100 | = | 0.08     | 0.99 |
| BZD | PF3D7_1343700 | = | 0.10     | 0.99 |
| BZD | PF3D7_1330500 | = | 1.64     | 0.99 |
| BZD | PF3D7_1343000 | = | 2.68     | 0.99 |
| BZD | PF3D7_1302000 | = | 2.04     | 1.00 |
| BZD | PF3D7_1107900 | = | 1.83     | 0.99 |

|     |               |   |      |      |
|-----|---------------|---|------|------|
| BZD | PF3D7_0606000 | = | 1.83 | 0.99 |
| BZD | PF3D7_0614500 | = | 0.74 | 0.99 |
| BZD | PF3D7_0203700 | = | 1.09 | 1.00 |
| BZD | PF3D7_0601700 | = | 1.51 | 0.99 |
| BZD | PF3D7_1001900 | = | 1.15 | 0.98 |
| BZD | PF3D7_1409500 | = | 1.54 | 0.98 |
| BZD | PF3D7_0916700 | = | 1.66 | 0.94 |
| BZD | PF3D7_0402000 | = | 0.93 | 1.00 |
| BZD | PF3D7_0102600 | = | 1.34 | 0.98 |
| BZD | PF3D7_1433400 | = | 1.04 | 1.00 |
| BZD | PF3D7_0322000 | = | 1.17 | 0.93 |
| BZD | PF3D7_0623900 | = | 0.88 | 0.99 |
| BZD | PF3D7_1013500 | = | 0.27 | 1.00 |

|      |               |   |      |      |
|------|---------------|---|------|------|
| DNTA | PF3D7_0811300 | = | 0.72 | 0.95 |
| DNTA | PF3D7_1305500 | = | 1.43 | 0.99 |
| DNTA | PF3D7_0615900 | = | 4.12 | 0.97 |
| DNTA | PF3D7_1122900 | = | 1.16 | 0.97 |
| DNTA | PF3D7_1141900 | = | 0.92 | 0.99 |
| DNTA | PF3D7_1475600 | = | 1.42 | 0.99 |
| DNTA | PF3D7_0211100 | = | 0.90 | 0.91 |
| DNTA | PF3D7_0203000 | = | 1.02 | 0.98 |
| DNTA | PF3D7_0404600 | = | 1.02 | 0.91 |
| DNTA | PF3D7_0416500 | = | 1.57 | 0.94 |
| DNTA | PF3D7_1018400 | = | 1.56 | 0.97 |
| DNTA | PF3D7_0511500 | = | 2.20 | 0.98 |
| DNTA | PF3D7_1360200 | = | 1.49 | 0.90 |
| DNTA | PF3D7_0611800 | = | 1.39 | 0.96 |
| DNTA | PF3D7_0619900 | = | 1.61 | 0.98 |
| DNTA | PF3D7_0521900 | = | 2.74 | 1.00 |
| DNTA | PF3D7_1219300 | = | 1.78 | 0.99 |
| DNTA | PF3D7_1133700 | = | 0.63 | 0.94 |
| DNTA | PF3D7_0808700 | = | 0.45 | 0.96 |
| DNTA | PF3D7_1136000 | = | 0.65 | 0.94 |
| DNTA | PF3D7_0931000 | = | 1.79 | 0.95 |
| DNTA | PF3D7_0830900 | = | 2.31 | 0.96 |
| DNTA | PF3D7_1231800 | = | 2.26 | 0.98 |
| DNTA | PF3D7_1035800 | = | 1.43 | 0.93 |
| DNTA | PF3D7_1444100 | = | 0.55 | 0.89 |
| DNTA | PF3D7_1138900 | = | 2.11 | 0.91 |
| DNTA | PF3D7_1441800 | = | 0.45 | 0.99 |
| DNTA | PF3D7_1345800 | = | 0.71 | 0.99 |
| DNTA | PF3D7_1432400 | = | 0.71 | 0.97 |
| DNTA | PF3D7_0819800 | = | 0.56 | 0.99 |
| DNTA | PF3D7_1207800 | = | 0.79 | 1.00 |
| DNTA | PF3D7_1143500 | = | 0.43 | 0.98 |
| DNTA | PF3D7_1001600 | = | 0.62 | 0.99 |
| DNTA | PF3D7_1019400 | = | 1.02 | 0.99 |
| DNTA | PF3D7_1311900 | = | 1.63 | 0.98 |
| DNTA | PF3D7_1035700 | = | 0.83 | 0.98 |

|      |               |   |      |      |
|------|---------------|---|------|------|
| DNTA | PF3D7_1103100 | = | 0.79 | 1.00 |
| DNTA | PF3D7_0812500 | = | 1.00 | 0.91 |
| DNTA | PF3D7_1216100 | = | 0.51 | 0.97 |
| DNTA | PF3D7_0206100 | = | 1.37 | 0.97 |
| DNTA | PF3D7_1352500 | = | 0.97 | 0.98 |
| DNTA | PF3D7_1226900 | = | 0.39 | 0.97 |
| DNTA | PF3D7_1368800 | = | 1.34 | 0.93 |
| DNTA | PF3D7_1432400 | = | 1.11 | 0.97 |
| DNTA | PF3D7_1343900 | = | 0.78 | 0.95 |
| DNTA | PF3D7_1328800 | = | 0.77 | 0.87 |
| DNTA | PF3D7_1138700 | = | 0.23 | 0.98 |
| DNTA | PF3D7_1327100 | = | 0.11 | 0.98 |
| DNTA | PF3D7_1136600 | = | 0.18 | 0.99 |
| DNTA | PF3D7_0902200 | = | 0.11 | 0.97 |
| DNTA | PF3D7_0727100 | = | 0.07 | 0.98 |
| DNTA | PF3D7_0105500 | = | 0.05 | 0.97 |
| DNTA | PF3D7_1126100 | = | 0.05 | 0.99 |
| DNTA | PF3D7_1343700 | = | 0.04 | 0.98 |
| DNTA | PF3D7_1330500 | = | 0.82 | 0.98 |
| DNTA | PF3D7_1343000 | = | 0.69 | 0.99 |
| DNTA | PF3D7_1302000 | = | 1.39 | 0.98 |
| DNTA | PF3D7_1107900 | = | 0.28 | 0.98 |
| DNTA | PF3D7_0606000 | = | 0.55 | 1.00 |
| DNTA | PF3D7_0614500 | = | 0.57 | 0.99 |
| DNTA | PF3D7_0203700 | = | 0.43 | 1.00 |
| DNTA | PF3D7_0601700 | = | 0.47 | 0.98 |
| DNTA | PF3D7_1001900 | = | 1.24 | 0.99 |
| DNTA | PF3D7_1409500 | = | 0.79 | 0.97 |
| DNTA | PF3D7_0916700 | = | 0.60 | 0.97 |
| DNTA | PF3D7_0402000 | = | 1.16 | 0.99 |
| DNTA | PF3D7_0102600 | = | 0.81 | 0.99 |
| DNTA | PF3D7_1433400 | = | 0.48 | 0.97 |
| DNTA | PF3D7_0322000 | = | 1.10 | 0.99 |
| DNTA | PF3D7_0623900 | = | 0.88 | 0.98 |
| DNTA | PF3D7_1013500 | = | 0.40 | 0.98 |

|     |               |   |      |      |
|-----|---------------|---|------|------|
| TSA | PF3D7_0811300 | = | 0.08 | 0.98 |
| TSA | PF3D7_1305500 | = | 0.99 | 0.98 |
| TSA | PF3D7_0615900 | = | 0.69 | 0.93 |
| TSA | PF3D7_1122900 | = | 0.90 | 0.98 |
| TSA | PF3D7_1141900 | = | 0.43 | 0.85 |
| TSA | PF3D7_1475600 | = | 0.32 | 0.91 |
| TSA | PF3D7_0211100 | = | 0.26 | 0.94 |
| TSA | PF3D7_0203000 | = | 0.52 | 0.95 |
| TSA | PF3D7_0404600 | = | 0.86 | 1.00 |
| TSA | PF3D7_0416500 | = | 1.15 | 0.97 |
| TSA | PF3D7_1018400 | = | 2.77 | 0.99 |
| TSA | PF3D7_0511500 | = | 1.03 | 0.97 |
| TSA | PF3D7_1360200 | = | 1.08 | 0.98 |
| TSA | PF3D7_0611800 | = | 1.79 | 0.97 |



|     |               |   |           |      |
|-----|---------------|---|-----------|------|
| TSA | PF3D7_0619900 | = | 0.38      | 0.97 |
| TSA | PF3D7_0521900 | = | 2.90      | 1.00 |
| TSA | PF3D7_1219300 | = | 2.85      | 0.98 |
| TSA | PF3D7_1133700 | = | 1.22      | 0.97 |
| TSA | PF3D7_0808700 | = | 2.23      | 0.97 |
| TSA | PF3D7_1136000 | = | 1.25      | 0.94 |
| TSA | PF3D7_0931000 | = | 1.04      | 0.96 |
| TSA | PF3D7_0830900 | = | 1.56      | 0.94 |
| TSA | PF3D7_1231800 | = | 2.37      | 0.91 |
| TSA | PF3D7_1035800 | = | 2.60      | 0.97 |
| TSA | PF3D7_1444100 | = | 4.06      | 0.86 |
| TSA | PF3D7_1138900 | = | 2.09      | 0.95 |
| TSA | PF3D7_1441800 | = | 0.61      | 0.96 |
| TSA | PF3D7_1345800 | = | 0.75      | 0.96 |
| TSA | PF3D7_1432400 | = | 0.81      | 0.96 |
| TSA | PF3D7_0819800 | = | 0.21      | 0.94 |
| TSA | PF3D7_1207800 | = | 0.06      | 0.94 |
| TSA | PF3D7_1143500 | = | 0.10      | 0.93 |
| TSA | PF3D7_1001600 | = | 0.30      | 0.94 |
| TSA | PF3D7_1019400 | = | 0.56      | 0.97 |
| TSA | PF3D7_1311900 | = | 0.43      | 0.99 |
| TSA | PF3D7_1035700 | = | 0.54      | 0.97 |
| TSA | PF3D7_1103100 | = | 0.51      | 0.99 |
| TSA | PF3D7_0812500 | = | 0.20      | 0.92 |
| TSA | PF3D7_1216100 | = | 0.72      | 0.97 |
| TSA | PF3D7_0206100 | = | 1.06      | 0.98 |
| TSA | PF3D7_1352500 | = | 0.91      | 0.99 |
| TSA | PF3D7_1226900 | = | 1.24      | 0.99 |
| TSA | PF3D7_1368800 | = | 0.35      | 0.97 |
| TSA | PF3D7_1432400 | = | 1.95      | 0.99 |
| TSA | PF3D7_1343900 | = | 0.76      | 0.99 |
| TSA | PF3D7_1328800 | = | 0.72      | 0.99 |
| TSA | PF3D7_1138700 | = | 0.47      | 0.93 |
| TSA | PF3D7_1327100 | = | 0.20      | 0.91 |
| TSA | PF3D7_1136600 | = | 0.17      | 0.93 |
| TSA | PF3D7_0902200 | = | 270842.23 | 0.10 |
| TSA | PF3D7_0727100 | = | 0.07      | 0.86 |
| TSA | PF3D7_0105500 | = | 0.50      | 0.94 |
| TSA | PF3D7_1126100 | = | 0.17      | 0.89 |
| TSA | PF3D7_1343700 | = | 0.20      | 0.87 |
| TSA | PF3D7_1330500 | = | 1.67      | 0.98 |
| TSA | PF3D7_1343000 | = | 4.71      | 0.99 |
| TSA | PF3D7_1302000 | = | 4.08      | 0.99 |
| TSA | PF3D7_1107900 | = | 1.88      | 0.97 |
| TSA | PF3D7_0606000 | = | 3.71      | 1.00 |
| TSA | PF3D7_0614500 | = | 2.92      | 0.99 |
| TSA | PF3D7_0203700 | = | 2.17      | 0.99 |
| TSA | PF3D7_0601700 | = | 2.50      | 0.99 |
| TSA | PF3D7_1001900 | = | 1.43      | 0.89 |
| TSA | PF3D7_1409500 | = | 0.83      | 0.97 |
| TSA | PF3D7_0916700 | = | 0.60      | 0.96 |
| TSA | PF3D7_0402000 | = | 0.76      | 0.99 |

|     |               |   |      |      |
|-----|---------------|---|------|------|
| TSA | PF3D7_0102600 | = | 2.52 | 0.94 |
| TSA | PF3D7_1433400 | = | 1.25 | 0.98 |
| TSA | PF3D7_0322000 | = | 0.71 | 0.95 |
| TSA | PF3D7_0623900 | = | 0.92 | 0.95 |
| TSA | PF3D7_1013500 | = | 0.51 | 0.99 |

|     |               |   |           |      |
|-----|---------------|---|-----------|------|
| CUR | PF3D7_0811300 | = | 0.28      | 0.93 |
| CUR | PF3D7_1305500 | = | 0.66      | 0.93 |
| CUR | PF3D7_0615900 | = | 0.76      | 0.94 |
| CUR | PF3D7_1122900 | = | 0.71      | 0.58 |
| CUR | PF3D7_1141900 | = | 3.51      | 0.96 |
| CUR | PF3D7_1475600 | = | 0.62      | 0.90 |
| CUR | PF3D7_0211100 | = | 4.21      | 0.94 |
| CUR | PF3D7_0203000 | = | 4.21      | 0.80 |
| CUR | PF3D7_0404600 | = | 0.51      | 0.91 |
| CUR | PF3D7_0416500 | = | 3.19      | 0.95 |
| CUR | PF3D7_1018400 | = | 4.10      | 0.92 |
| CUR | PF3D7_0511500 | = | 1.57      | 0.87 |
| CUR | PF3D7_1360200 | = | 0.40      | 0.94 |
| CUR | PF3D7_0611800 | = | 1.10      | 0.97 |
| CUR | PF3D7_0619900 | = | 1.72      | 0.99 |
| CUR | PF3D7_0521900 | = | 3.33      | 0.97 |
| CUR | PF3D7_1219300 | = | 3.42      | 0.92 |
| CUR | PF3D7_1133700 | = | 392.78    | 0.90 |
| CUR | PF3D7_0808700 | = | 9.17      | 0.91 |
| CUR | PF3D7_1136000 | = | 1.31      | 0.90 |
| CUR | PF3D7_0931000 | = | 7.16      | 0.96 |
| CUR | PF3D7_0830900 | = | 12.49     | 0.93 |
| CUR | PF3D7_1231800 | = | 11.53     | 0.96 |
| CUR | PF3D7_1035800 | = | 2.23      | 0.97 |
| CUR | PF3D7_1444100 | = | 8.82      | 0.92 |
| CUR | PF3D7_1138900 | = | 2.29      | 0.95 |
| CUR | PF3D7_1441800 | = | 1.06      | 0.96 |
| CUR | PF3D7_1345800 | = | 0.14      | 0.95 |
| CUR | PF3D7_1432400 | = | 0.53      | 0.99 |
| CUR | PF3D7_0819800 | = | 0.37      | 0.99 |
| CUR | PF3D7_1207800 | = | 0.38      | 1.00 |
| CUR | PF3D7_1143500 | = | 0.18      | 0.98 |
| CUR | PF3D7_1001600 | = | 0.31      | 0.99 |
| CUR | PF3D7_1019400 | > | 2262.7 uM |      |
| CUR | PF3D7_1311900 | = | 0.76      | 0.96 |
| CUR | PF3D7_1035700 | = | 0.37      | 0.97 |
| CUR | PF3D7_1103100 | = | 0.03      | 0.94 |
| CUR | PF3D7_0812500 | = | 0.10      | 0.84 |
| CUR | PF3D7_1216100 | = | 1.32      | 0.98 |
| CUR | PF3D7_0206100 | = | 0.56      | 0.95 |
| CUR | PF3D7_1352500 | = | 0.70      | 0.98 |
| CUR | PF3D7_1226900 | = | 2.19      | 0.98 |
| CUR | PF3D7_1368800 | = | 9.38      | 0.92 |
| CUR | PF3D7_1432400 | = | 0.48      | 0.99 |

|     |               |   |      |      |
|-----|---------------|---|------|------|
| CUR | PF3D7_1343900 | = | 0.43 | 0.95 |
| CUR | PF3D7_1328800 | = | 0.99 | 0.97 |
| CUR | PF3D7_1138700 | = | 0.34 | 0.96 |
| CUR | PF3D7_1327100 | = | 0.17 | 0.97 |
| CUR | PF3D7_1136600 | = | 0.28 | 0.98 |
| CUR | PF3D7_0902200 | = | 0.85 | 0.99 |
| CUR | PF3D7_0727100 | = | 0.28 | 0.98 |
| CUR | PF3D7_0105500 | = | 0.17 | 0.99 |
| CUR | PF3D7_1126100 | = | 0.34 | 0.98 |
| CUR | PF3D7_1343700 | = | 0.18 | 1.00 |
| CUR | PF3D7_1330500 | = | 2.75 | 0.99 |
| CUR | PF3D7_1343000 | = | 1.47 | 0.98 |
| CUR | PF3D7_1302000 | = | 2.92 | 0.99 |
| CUR | PF3D7_1107900 | = | 1.54 | 1.00 |
| CUR | PF3D7_0606000 | = | 2.24 | 0.96 |
| CUR | PF3D7_0614500 | = | 2.46 | 0.99 |
| CUR | PF3D7_0203700 | = | 1.63 | 0.97 |
| CUR | PF3D7_0601700 | = | 2.43 | 0.97 |
| CUR | PF3D7_1001900 | = | 0.15 | 0.93 |
| CUR | PF3D7_1409500 | = | 0.98 | 0.75 |
| CUR | PF3D7_0916700 | = | 0.11 | 0.98 |
| CUR | PF3D7_0402000 | = | 0.18 | 0.94 |
| CUR | PF3D7_0102600 | = | 0.19 | 0.94 |
| CUR | PF3D7_1433400 | = | 0.21 | 0.98 |
| CUR | PF3D7_0322000 | = | 0.24 | 0.98 |
| CUR | PF3D7_0623900 | = | 0.63 | 0.99 |
| CUR | PF3D7_1013500 | = | 0.40 | 0.92 |

|     |               |   |      |      |
|-----|---------------|---|------|------|
| DNR | PF3D7_0811300 | = | 1.03 | 0.96 |
| DNR | PF3D7_1305500 | = | 0.60 | 0.99 |
| DNR | PF3D7_0615900 | = | 0.25 | 0.95 |
| DNR | PF3D7_1122900 | = | 0.47 | 0.95 |
| DNR | PF3D7_1141900 | = | 0.69 | 0.90 |
| DNR | PF3D7_1475600 | = | 0.50 | 0.99 |
| DNR | PF3D7_0211100 | = | 0.25 | 0.87 |
| DNR | PF3D7_0203000 | = | 0.69 | 0.95 |
| DNR | PF3D7_0404600 | = | 1.00 | 0.99 |
| DNR | PF3D7_0416500 | = | 0.09 | 0.94 |
| DNR | PF3D7_1018400 | = | 0.10 | 0.95 |
| DNR | PF3D7_0511500 | = | 0.20 | 0.97 |
| DNR | PF3D7_1360200 | = | 0.11 | 0.98 |
| DNR | PF3D7_0611800 | = | 0.17 | 0.99 |
| DNR | PF3D7_0619900 | = | 0.00 | 0.93 |
| DNR | PF3D7_0521900 | = | 0.14 | 0.96 |
| DNR | PF3D7_1219300 | = | 0.15 | 0.98 |
| DNR | PF3D7_1133700 | = | 1.09 | 0.95 |
| DNR | PF3D7_0808700 | = | 2.45 | 0.95 |
| DNR | PF3D7_1136000 | = | 2.06 | 0.98 |
| DNR | PF3D7_0931000 | = | 1.76 | 0.96 |
| DNR | PF3D7_0830900 | = | 1.38 | 0.98 |

|     |               |   |      |      |
|-----|---------------|---|------|------|
| DNR | PF3D7_1231800 | = | 5.17 | 0.97 |
| DNR | PF3D7_1035800 | = | 8.52 | 0.91 |
| DNR | PF3D7_1444100 | = | 5.49 | 0.97 |
| DNR | PF3D7_1138900 | = | 1.05 | 0.93 |
| DNR | PF3D7_1441800 | = | 0.70 | 0.99 |
| DNR | PF3D7_1345800 | = | 0.59 | 1.00 |
| DNR | PF3D7_1432400 | = | 0.56 | 1.00 |
| DNR | PF3D7_0819800 | = | 0.69 | 1.00 |
| DNR | PF3D7_1207800 | = | 0.55 | 1.00 |
| DNR | PF3D7_1143500 | = | 0.47 | 1.00 |
| DNR | PF3D7_1001600 | = | 0.45 | 0.98 |
| DNR | PF3D7_1019400 | = | 0.04 | 0.98 |
| DNR | PF3D7_1311900 | = | 1.04 | 1.00 |
| DNR | PF3D7_1035700 | = | 0.94 | 1.00 |
| DNR | PF3D7_1103100 | = | 1.06 | 0.98 |
| DNR | PF3D7_0812500 | = | 0.84 | 0.96 |
| DNR | PF3D7_1216100 | = | 1.90 | 1.00 |
| DNR | PF3D7_0206100 | = | 0.76 | 0.99 |
| DNR | PF3D7_1352500 | = | 0.87 | 1.00 |
| DNR | PF3D7_1226900 | = | 0.80 | 1.00 |
| DNR | PF3D7_1368800 | = | 0.96 | 0.99 |
| DNR | PF3D7_1432400 | = | 2.22 | 0.99 |
| DNR | PF3D7_1343900 | = | 0.09 | 0.84 |
| DNR | PF3D7_1328800 | = | 0.44 | 0.97 |
| DNR | PF3D7_1138700 | = | 0.31 | 0.98 |
| DNR | PF3D7_1327100 | = | 0.42 | 0.99 |
| DNR | PF3D7_1136600 | = | 0.40 | 0.99 |
| DNR | PF3D7_0902200 | = | 0.32 | 0.99 |
| DNR | PF3D7_0727100 | = | 0.17 | 1.00 |
| DNR | PF3D7_0105500 | = | 0.33 | 0.99 |
| DNR | PF3D7_1126100 | = | 0.16 | 0.97 |
| DNR | PF3D7_1343700 | = | 0.19 | 0.99 |
| DNR | PF3D7_1330500 | = | 0.94 | 0.98 |
| DNR | PF3D7_1343000 | = | 1.73 | 1.00 |
| DNR | PF3D7_1302000 | = | 1.42 | 0.99 |
| DNR | PF3D7_1107900 | = | 1.57 | 1.00 |
| DNR | PF3D7_0606000 | = | 1.30 | 0.99 |
| DNR | PF3D7_0614500 | = | 1.14 | 0.99 |
| DNR | PF3D7_0203700 | = | 1.44 | 1.00 |
| DNR | PF3D7_0601700 | = | 1.30 | 0.99 |
| DNR | PF3D7_1001900 | = | 1.07 | 0.99 |
| DNR | PF3D7_1409500 | = | 1.03 | 1.00 |
| DNR | PF3D7_0916700 | = | 0.70 | 0.94 |
| DNR | PF3D7_0402000 | = | 0.54 | 0.99 |
| DNR | PF3D7_0102600 | = | 0.92 | 0.97 |
| DNR | PF3D7_1433400 | = | 0.99 | 0.99 |
| DNR | PF3D7_0322000 | = | 1.05 | 0.99 |
| DNR | PF3D7_0623900 | = | 0.97 | 0.97 |
| DNR | PF3D7_1013500 | = | 0.04 | 0.95 |

|     |               |   |      |      |
|-----|---------------|---|------|------|
| QHS | PF3D7_0811300 | = | 1.12 | 0.95 |
| QHS | PF3D7_1305500 | = | 1.58 | 0.98 |
| QHS | PF3D7_0615900 | = | 0.51 | 0.98 |
| QHS | PF3D7_1122900 | = | 0.51 | 0.99 |
| QHS | PF3D7_1141900 | = | 0.86 | 0.93 |
| QHS | PF3D7_1475600 | = | 0.51 | 0.94 |
| QHS | PF3D7_0211100 | = | 0.79 | 0.97 |
| QHS | PF3D7_0203000 | = | 0.33 | 0.93 |
| QHS | PF3D7_0404600 | = | 1.00 | 0.98 |
| QHS | PF3D7_0416500 | = | 0.35 | 0.91 |
| QHS | PF3D7_1018400 | = | 0.67 | 0.94 |
| QHS | PF3D7_0511500 | = | 0.49 | 0.90 |
| QHS | PF3D7_1360200 | = | 0.50 | 0.99 |
| QHS | PF3D7_0611800 | = | 0.98 | 0.99 |
| QHS | PF3D7_0619900 | = | 0.63 | 0.99 |
| QHS | PF3D7_0521900 | = | 0.59 | 0.95 |
| QHS | PF3D7_1219300 | = | 1.21 | 0.97 |
| QHS | PF3D7_1133700 | = | 1.48 | 0.95 |
| QHS | PF3D7_0808700 | = | 5.17 | 0.99 |
| QHS | PF3D7_1136000 | = | 2.63 | 0.91 |
| QHS | PF3D7_0931000 | = | 2.70 | 0.94 |
| QHS | PF3D7_0830900 | = | 1.78 | 0.85 |
| QHS | PF3D7_1231800 | = | 3.70 | 0.96 |
| QHS | PF3D7_1035800 | = | 2.02 | 0.93 |
| QHS | PF3D7_1444100 | = | 2.12 | 0.98 |
| QHS | PF3D7_1138900 | = | 1.93 | 0.94 |
| QHS | PF3D7_1441800 | = | 0.60 | 0.99 |
| QHS | PF3D7_1345800 | = | 1.12 | 0.99 |
| QHS | PF3D7_1432400 | = | 0.50 | 0.99 |
| QHS | PF3D7_0819800 | = | 0.75 | 0.92 |
| QHS | PF3D7_1207800 | = | 0.81 | 0.98 |
| QHS | PF3D7_1143500 | = | 0.66 | 0.96 |
| QHS | PF3D7_1001600 | = | 0.50 | 0.98 |
| QHS | PF3D7_1019400 | = | 0.24 | 0.96 |
| QHS | PF3D7_1311900 | = | 1.00 | 0.99 |
| QHS | PF3D7_1035700 | = | 1.24 | 0.96 |
| QHS | PF3D7_1103100 | = | 1.15 | 0.91 |
| QHS | PF3D7_0812500 | = | 0.22 | 0.99 |
| QHS | PF3D7_1216100 | = | 1.37 | 0.98 |
| QHS | PF3D7_0206100 | = | 0.44 | 0.99 |
| QHS | PF3D7_1352500 | = | 0.93 | 0.99 |
| QHS | PF3D7_1226900 | = | 1.85 | 0.98 |
| QHS | PF3D7_1368800 | = | 0.52 | 0.99 |
| QHS | PF3D7_1432400 | = | 1.70 | 0.98 |
| QHS | PF3D7_1343900 | = | 0.42 | 0.95 |
| QHS | PF3D7_1328800 | = | 0.30 | 0.98 |
| QHS | PF3D7_1138700 | = | 0.29 | 0.96 |
| QHS | PF3D7_1327100 | = | 0.28 | 0.94 |
| QHS | PF3D7_1136600 | = | 0.34 | 0.97 |
| QHS | PF3D7_0902200 | = | 0.19 | 0.95 |
| QHS | PF3D7_0727100 | = | 0.05 | 0.82 |
| QHS | PF3D7_0105500 | = | 0.14 | 0.92 |

|     |               |   |      |      |
|-----|---------------|---|------|------|
| QHS | PF3D7_1126100 | = | 0.15 | 0.95 |
| QHS | PF3D7_1343700 | = | 0.15 | 0.96 |
| QHS | PF3D7_1330500 | = | 0.64 | 0.97 |
| QHS | PF3D7_1343000 | = | 1.51 | 0.99 |
| QHS | PF3D7_1302000 | = | 1.26 | 0.99 |
| QHS | PF3D7_1107900 | = | 2.16 | 0.99 |
| QHS | PF3D7_0606000 | = | 1.07 | 0.96 |
| QHS | PF3D7_0614500 | = | 0.51 | 0.94 |
| QHS | PF3D7_0203700 | = | 1.01 | 0.95 |
| QHS | PF3D7_0601700 | = | 1.14 | 0.98 |
| QHS | PF3D7_1001900 | = | 1.07 | 0.98 |
| QHS | PF3D7_1409500 | = | 1.47 | 0.99 |
| QHS | PF3D7_0916700 | = | 0.82 | 0.95 |
| QHS | PF3D7_0402000 | = | 0.27 | 1.00 |
| QHS | PF3D7_0102600 | = | 1.01 | 0.98 |
| QHS | PF3D7_1433400 | = | 0.94 | 1.00 |
| QHS | PF3D7_0322000 | = | 1.03 | 0.99 |
| QHS | PF3D7_0623900 | = | 0.96 | 1.00 |
| QHS | PF3D7_1013500 | = | 0.17 | 0.95 |

|     |               |   |      |      |
|-----|---------------|---|------|------|
| DHA | PF3D7_0811300 | = | 1.26 | 0.95 |
| DHA | PF3D7_1305500 | = | 1.32 | 0.98 |
| DHA | PF3D7_0615900 | = | 0.52 | 0.93 |
| DHA | PF3D7_1122900 | = | 0.55 | 0.96 |
| DHA | PF3D7_1141900 | = | 1.65 | 0.99 |
| DHA | PF3D7_1475600 | = | 0.52 | 0.97 |
| DHA | PF3D7_0211100 | = | 0.81 | 0.99 |
| DHA | PF3D7_0203000 | = | 0.52 | 0.96 |
| DHA | PF3D7_0404600 | = | 1.00 | 0.99 |
| DHA | PF3D7_0416500 | = | 1.69 | 0.99 |
| DHA | PF3D7_1018400 | = | 1.89 | 0.98 |
| DHA | PF3D7_0511500 | = | 1.08 | 0.94 |
| DHA | PF3D7_1360200 | = | 1.45 | 0.94 |
| DHA | PF3D7_0611800 | = | 2.75 | 0.98 |
| DHA | PF3D7_0619900 | = | 0.64 | 0.98 |
| DHA | PF3D7_0521900 | = | 1.51 | 0.98 |
| DHA | PF3D7_1219300 | = | 2.70 | 0.96 |
| DHA | PF3D7_1133700 | = | 0.54 | 0.93 |
| DHA | PF3D7_0808700 | = | 7.39 | 0.97 |
| DHA | PF3D7_1136000 | = | 2.50 | 0.92 |
| DHA | PF3D7_0931000 | = | 4.90 | 0.94 |
| DHA | PF3D7_0830900 | = | 1.33 | 0.76 |
| DHA | PF3D7_1231800 | = | 5.40 | 0.99 |
| DHA | PF3D7_1035800 | = | 2.10 | 0.92 |
| DHA | PF3D7_1444100 | = | 3.70 | 0.89 |
| DHA | PF3D7_1138900 | = | 1.67 | 0.97 |
| DHA | PF3D7_1441800 | = | 0.56 | 0.99 |
| DHA | PF3D7_1345800 | = | 0.86 | 0.99 |
| DHA | PF3D7_1432400 | = | 1.05 | 0.99 |

|     |               |   |      |      |
|-----|---------------|---|------|------|
| DHA | PF3D7_0819800 | = | 0.63 | 0.93 |
| DHA | PF3D7_1207800 | = | 0.87 | 0.99 |
| DHA | PF3D7_1143500 | = | 0.37 | 0.99 |
| DHA | PF3D7_1001600 | = | 0.58 | 0.98 |
| DHA | PF3D7_1019400 | = | 0.31 | 0.94 |
| DHA | PF3D7_1311900 | = | 0.59 | 0.87 |
| DHA | PF3D7_1035700 | = | 0.83 | 0.99 |
| DHA | PF3D7_1103100 | = | 1.50 | 0.96 |
| DHA | PF3D7_0812500 | = | 0.61 | 0.83 |
| DHA | PF3D7_1216100 | = | 1.06 | 0.97 |
| DHA | PF3D7_0206100 | = | 0.28 | 0.96 |
| DHA | PF3D7_1352500 | = | 1.27 | 0.97 |
| DHA | PF3D7_1226900 | = | 2.10 | 0.97 |
| DHA | PF3D7_1368800 | = | 0.34 | 0.97 |
| DHA | PF3D7_1432400 | = | 2.10 | 0.97 |
| DHA | PF3D7_1343900 | = | 0.35 | 0.97 |
| DHA | PF3D7_1328800 | = | 0.18 | 0.98 |
| DHA | PF3D7_1138700 | = | 0.20 | 0.96 |
| DHA | PF3D7_1327100 | = | 0.17 | 0.96 |
| DHA | PF3D7_1136600 | = | 0.20 | 0.97 |
| DHA | PF3D7_0902200 | = | 0.30 | 0.95 |
| DHA | PF3D7_0727100 | = | 0.03 | 0.87 |
| DHA | PF3D7_0105500 | = | 0.27 | 0.92 |
| DHA | PF3D7_1126100 | = | 0.13 | 0.93 |
| DHA | PF3D7_1343700 | = | 0.13 | 0.93 |
| DHA | PF3D7_1330500 | = | 0.45 | 0.97 |
| DHA | PF3D7_1343000 | = | 1.80 | 0.98 |
| DHA | PF3D7_1302000 | = | 1.25 | 0.98 |
| DHA | PF3D7_1107900 | = | 1.98 | 0.99 |
| DHA | PF3D7_0606000 | = | 1.50 | 0.99 |
| DHA | PF3D7_0614500 | = | 0.50 | 0.98 |
| DHA | PF3D7_0203700 | = | 0.65 | 0.98 |
| DHA | PF3D7_0601700 | = | 0.85 | 0.99 |
| DHA | PF3D7_1001900 | = | 1.72 | 0.99 |
| DHA | PF3D7_1409500 | = | 1.29 | 0.99 |
| DHA | PF3D7_0916700 | = | 1.22 | 0.93 |
| DHA | PF3D7_0402000 | = | 0.30 | 0.99 |
| DHA | PF3D7_0102600 | = | 1.31 | 0.98 |
| DHA | PF3D7_1433400 | = | 1.01 | 0.99 |
| DHA | PF3D7_0322000 | = | 1.19 | 0.99 |
| DHA | PF3D7_0623900 | = | 1.23 | 0.97 |
| DHA | PF3D7_1013500 | = | 0.22 | 0.99 |

|     |               |   |      |      |
|-----|---------------|---|------|------|
| VER | PF3D7_0811300 | = | 0.76 | 0.96 |
| VER | PF3D7_1305500 | = | 0.67 | 0.99 |
| VER | PF3D7_0615900 | = | 1.02 | 0.98 |
| VER | PF3D7_1122900 | = | 0.41 | 0.90 |
| VER | PF3D7_1141900 | = | 1.16 | 1.00 |
| VER | PF3D7_1475600 | = | 0.46 | 0.99 |

|     |               |   |      |      |
|-----|---------------|---|------|------|
| VER | PF3D7_0211100 | = | 0.97 | 0.96 |
| VER | PF3D7_0203000 | = | 1.00 | 0.99 |
| VER | PF3D7_0404600 | = | 1.00 | 0.99 |
| VER | PF3D7_0416500 | = | 1.20 | 0.96 |
| VER | PF3D7_1018400 | = | 1.15 | 0.93 |
| VER | PF3D7_0511500 | = | 1.61 | 0.97 |
| VER | PF3D7_1360200 | = | 1.09 | 0.98 |
| VER | PF3D7_0611800 | = | 0.77 | 0.95 |
| VER | PF3D7_0619900 | = | 0.75 | 0.93 |
| VER | PF3D7_0521900 | = | 0.94 | 0.96 |
| VER | PF3D7_1219300 | = | 1.35 | 0.95 |
| VER | PF3D7_1133700 | = | 0.60 | 0.93 |
| VER | PF3D7_0808700 | = | 1.36 | 0.95 |
| VER | PF3D7_1136000 | = | 0.96 | 0.95 |
| VER | PF3D7_0931000 | = | 1.24 | 0.94 |
| VER | PF3D7_0830900 | = | 0.24 | 0.89 |
| VER | PF3D7_1231800 | = | 1.38 | 0.95 |
| VER | PF3D7_1035800 | = | 3.06 | 0.88 |
| VER | PF3D7_1444100 | = | 1.37 | 0.99 |
| VER | PF3D7_1138900 | = | 0.72 | 0.91 |
| VER | PF3D7_1441800 | = | 0.61 | 0.99 |
| VER | PF3D7_1345800 | = | 0.77 | 0.99 |
| VER | PF3D7_1432400 | = | 1.27 | 0.99 |
| VER | PF3D7_0819800 | = | 0.88 | 0.99 |
| VER | PF3D7_1207800 | = | 0.84 | 0.98 |
| VER | PF3D7_1143500 | = | 0.93 | 0.98 |
| VER | PF3D7_1001600 | = | 0.76 | 1.00 |
| VER | PF3D7_1019400 | = | 0.41 | 0.99 |
| VER | PF3D7_1311900 | = | 0.59 | 0.97 |
| VER | PF3D7_1035700 | = | 0.90 | 0.98 |
| VER | PF3D7_1103100 | = | 1.40 | 0.95 |
| VER | PF3D7_0812500 | = | 0.53 | 0.93 |
| VER | PF3D7_1216100 | = | 1.21 | 0.98 |
| VER | PF3D7_0206100 | = | 0.88 | 0.98 |
| VER | PF3D7_1352500 | = | 0.62 | 0.99 |
| VER | PF3D7_1226900 | = | 0.96 | 0.99 |
| VER | PF3D7_1368800 | = | 0.54 | 1.00 |
| VER | PF3D7_1432400 | = | 1.74 | 0.97 |
| VER | PF3D7_1343900 | = | 0.64 | 0.97 |
| VER | PF3D7_1328800 | = | 0.48 | 0.99 |
| VER | PF3D7_1138700 | = | 0.53 | 0.99 |
| VER | PF3D7_1327100 | = | 0.48 | 0.97 |
| VER | PF3D7_1136600 | = | 0.28 | 0.99 |
| VER | PF3D7_0902200 | = | 0.43 | 0.97 |
| VER | PF3D7_0727100 | = | 0.02 | 0.99 |
| VER | PF3D7_0105500 | = | 0.30 | 0.98 |
| VER | PF3D7_1126100 | = | 0.21 | 1.00 |
| VER | PF3D7_1343700 | = | 0.31 | 1.00 |
| VER | PF3D7_1330500 | = | 1.42 | 1.00 |
| VER | PF3D7_1343000 | = | 1.55 | 1.00 |
| VER | PF3D7_1302000 | = | 1.79 | 0.99 |
| VER | PF3D7_1107900 | = | 1.28 | 1.00 |



|     |               |   |      |      |
|-----|---------------|---|------|------|
| VER | PF3D7_0606000 | = | 1.38 | 0.99 |
| VER | PF3D7_0614500 | = | 0.87 | 1.00 |
| VER | PF3D7_0203700 | = | 1.34 | 1.00 |
| VER | PF3D7_0601700 | = | 1.17 | 0.99 |
| VER | PF3D7_1001900 | = | 1.10 | 1.00 |
| VER | PF3D7_1409500 | = | 0.98 | 0.94 |
| VER | PF3D7_0916700 | = | 0.92 | 0.99 |
| VER | PF3D7_0402000 | = | 0.76 | 0.98 |
| VER | PF3D7_0102600 | = | 0.54 | 0.99 |
| VER | PF3D7_1433400 | = | 0.83 | 0.98 |
| VER | PF3D7_0322000 | = | 1.26 | 0.98 |
| VER | PF3D7_0623900 | = | 1.12 | 0.99 |
| VER | PF3D7_1013500 | = | 0.26 | 0.92 |

|    |               |   |      |      |
|----|---------------|---|------|------|
| AQ | PF3D7_0811300 | = | 0.20 | 0.89 |
| AQ | PF3D7_1305500 | = | 0.60 | 0.99 |
| AQ | PF3D7_0615900 | = | 0.89 | 0.98 |
| AQ | PF3D7_1122900 | = | 0.40 | 0.96 |
| AQ | PF3D7_1141900 | = | 0.38 | 0.96 |
| AQ | PF3D7_1475600 | = | 0.65 | 0.99 |
| AQ | PF3D7_0211100 | = | 1.45 | 1.00 |
| AQ | PF3D7_0203000 | = | 0.16 | 0.98 |
| AQ | PF3D7_0404600 | = | 0.25 | 0.85 |
| AQ | PF3D7_0416500 | = | 0.77 | 0.83 |
| AQ | PF3D7_1018400 | = | 0.93 | 0.90 |
| AQ | PF3D7_0511500 | = | 1.33 | 1.00 |
| AQ | PF3D7_1360200 | = | 0.86 | 0.99 |
| AQ | PF3D7_0611800 | = | 1.29 | 0.98 |
| AQ | PF3D7_0619900 | = | 0.65 | 0.98 |
| AQ | PF3D7_0521900 | = | 1.27 | 0.99 |
| AQ | PF3D7_1219300 | = | 0.85 | 0.93 |
| AQ | PF3D7_1133700 | = | 1.08 | 1.00 |
| AQ | PF3D7_0808700 | = | 1.07 | 0.99 |
| AQ | PF3D7_1136000 | = | 1.19 | 1.00 |
| AQ | PF3D7_0931000 | = | 1.74 | 0.99 |
| AQ | PF3D7_0830900 | = | 2.82 | 0.95 |
| AQ | PF3D7_1231800 | = | 2.18 | 1.00 |
| AQ | PF3D7_1035800 | = | 2.15 | 1.00 |
| AQ | PF3D7_1444100 | = | 1.50 | 0.99 |
| AQ | PF3D7_1138900 | = | 1.73 | 0.97 |
| AQ | PF3D7_1441800 | = | 0.43 | 0.94 |
| AQ | PF3D7_1345800 | = | 1.45 | 0.99 |
| AQ | PF3D7_1432400 | = | 0.50 | 0.98 |
| AQ | PF3D7_0819800 | = | 0.46 | 0.99 |
| AQ | PF3D7_1207800 | = | 1.42 | 0.99 |
| AQ | PF3D7_1143500 | = | 0.70 | 0.96 |
| AQ | PF3D7_1001600 | = | 0.72 | 0.99 |
| AQ | PF3D7_1019400 | = | 0.60 | 0.90 |
| AQ | PF3D7_1311900 | = | 0.97 | 0.91 |

|    |               |   |       |      |
|----|---------------|---|-------|------|
| AQ | PF3D7_1035700 | = | 1.18  | 0.98 |
| AQ | PF3D7_1103100 | = | 1.14  | 0.99 |
| AQ | PF3D7_0812500 | = | 1.04  | 0.97 |
| AQ | PF3D7_1216100 | = | 2.88  | 0.90 |
| AQ | PF3D7_0206100 | = | 24.84 | 0.89 |
| AQ | PF3D7_1352500 | = | 30.48 | 0.99 |
| AQ | PF3D7_1226900 | = | 1.60  | 0.91 |
| AQ | PF3D7_1368800 | = | 26.87 | 0.95 |
| AQ | PF3D7_1432400 | = | 1.01  | 0.88 |
| AQ | PF3D7_1343900 | = | 0.30  | 0.89 |
| AQ | PF3D7_1328800 | = | 29.81 | 0.82 |
| AQ | PF3D7_1138700 | = | 0.82  | 0.97 |
| AQ | PF3D7_1327100 | = | 0.20  | 0.96 |
| AQ | PF3D7_1136600 | = | 0.46  | 0.98 |
| AQ | PF3D7_0902200 | = | 0.69  | 0.91 |
| AQ | PF3D7_0727100 | = | 0.91  | 0.97 |
| AQ | PF3D7_0105500 | = | 0.26  | 0.94 |
| AQ | PF3D7_1126100 | = | 0.35  | 0.99 |
| AQ | PF3D7_1343700 | = | 0.48  | 0.96 |
| AQ | PF3D7_1330500 | = | 0.99  | 0.99 |
| AQ | PF3D7_1343000 | = | 1.23  | 0.97 |
| AQ | PF3D7_1302000 | = | 1.28  | 0.97 |
| AQ | PF3D7_1107900 | = | 1.11  | 0.96 |
| AQ | PF3D7_0606000 | = | 1.48  | 0.96 |
| AQ | PF3D7_0614500 | = | 2.24  | 0.99 |
| AQ | PF3D7_0203700 | = | 1.58  | 0.96 |
| AQ | PF3D7_0601700 | = | 1.59  | 0.96 |
| AQ | PF3D7_1001900 | = | 2.25  | 0.99 |
| AQ | PF3D7_1409500 | = | 1.08  | 0.97 |
| AQ | PF3D7_0916700 | = | 1.51  | 0.99 |
| AQ | PF3D7_0402000 | = | 1.58  | 0.98 |
| AQ | PF3D7_0102600 | = | 0.91  | 0.99 |
| AQ | PF3D7_1433400 | = | 1.57  | 0.99 |
| AQ | PF3D7_0322000 | = | 2.40  | 0.99 |
| AQ | PF3D7_0623900 | = | 1.95  | 0.98 |
| AQ | PF3D7_1013500 | = | 0.14  | 1.00 |

|    |               |   |      |      |
|----|---------------|---|------|------|
| AS | PF3D7_0811300 | = | 0.44 | 0.95 |
| AS | PF3D7_1305500 | = | 0.67 | 0.99 |
| AS | PF3D7_0615900 | = | 1.00 | 0.99 |
| AS | PF3D7_1122900 | = | 0.44 | 0.91 |
| AS | PF3D7_1141900 | = | 0.56 | 1.00 |
| AS | PF3D7_1475600 | = | 0.89 | 0.99 |
| AS | PF3D7_0211100 | = | 1.22 | 0.96 |
| AS | PF3D7_0203000 | = | 0.91 | 0.17 |
| AS | PF3D7_0404600 | = | 1.33 | 0.99 |
| AS | PF3D7_0416500 | = | 0.85 | 0.90 |
| AS | PF3D7_1018400 | = | 0.46 | 0.91 |
| AS | PF3D7_0511500 | = | 0.84 | 0.94 |
| AS | PF3D7_1360200 | = | 1.48 | 0.85 |
| AS | PF3D7_0611800 | = | 1.33 | 0.95 |

|    |               |   |       |      |
|----|---------------|---|-------|------|
| AS | PF3D7_0619900 | = | 0.80  | 0.98 |
| AS | PF3D7_0521900 | = | 1.60  | 0.99 |
| AS | PF3D7_1219300 | = | 1.21  | 0.89 |
| AS | PF3D7_1133700 | = | 0.71  | 0.95 |
| AS | PF3D7_0808700 | = | 0.80  | 1.00 |
| AS | PF3D7_1136000 | = | 1.27  | 0.97 |
| AS | PF3D7_0931000 | = | 3.42  | 0.97 |
| AS | PF3D7_0830900 | = | 1.95  | 0.92 |
| AS | PF3D7_1231800 | = | 4.88  | 1.00 |
| AS | PF3D7_1035800 | = | 2.91  | 0.98 |
| AS | PF3D7_1444100 | = | 3.04  | 0.95 |
| AS | PF3D7_1138900 | = | 2.10  | 0.94 |
| AS | PF3D7_1441800 | = | 0.79  | 0.82 |
| AS | PF3D7_1345800 | = | 1.75  | 0.98 |
| AS | PF3D7_1432400 | = | 1.46  | 0.97 |
| AS | PF3D7_0819800 | = | 0.41  | 0.93 |
| AS | PF3D7_1207800 | = | 1.53  | 0.99 |
| AS | PF3D7_1143500 | = | 0.75  | 0.99 |
| AS | PF3D7_1001600 | = | 0.75  | 1.00 |
| AS | PF3D7_1019400 | = | 1.41  | 0.92 |
| AS | PF3D7_1311900 | = | 1.03  | 0.99 |
| AS | PF3D7_1035700 | = | 0.87  | 0.99 |
| AS | PF3D7_1103100 | = | 0.75  | 0.94 |
| AS | PF3D7_0812500 | = | 0.73  | 0.94 |
| AS | PF3D7_1216100 | = | 0.52  | 0.86 |
| AS | PF3D7_0206100 | = | 30.48 | 0.84 |
| AS | PF3D7_1352500 | = | 33.90 | 0.99 |
| AS | PF3D7_1226900 | = | 0.28  | 0.84 |
| AS | PF3D7_1368800 | = | 78.80 | 0.88 |
| AS | PF3D7_1432400 | = | 76.16 | 0.79 |
| AS | PF3D7_1343900 | = | 10.93 | 0.85 |
| AS | PF3D7_1328800 | = | 75.88 | 0.99 |
| AS | PF3D7_1138700 | = | 0.93  | 0.98 |
| AS | PF3D7_1327100 | = | 0.41  | 0.98 |
| AS | PF3D7_1136600 | = | 0.49  | 0.98 |
| AS | PF3D7_0902200 | = | 0.85  | 0.99 |
| AS | PF3D7_0727100 | = | 1.09  | 0.95 |
| AS | PF3D7_0105500 | = | 0.24  | 0.97 |
| AS | PF3D7_1126100 | = | 0.42  | 0.97 |
| AS | PF3D7_1343700 | = | 0.50  | 0.95 |
| AS | PF3D7_1330500 | = | 0.84  | 0.91 |
| AS | PF3D7_1343000 | = | 0.90  | 0.89 |
| AS | PF3D7_1302000 | = | 0.84  | 0.88 |
| AS | PF3D7_1107900 | = | 0.62  | 0.90 |
| AS | PF3D7_0606000 | = | 0.77  | 0.89 |
| AS | PF3D7_0614500 | = | 1.42  | 0.89 |
| AS | PF3D7_0203700 | = | 1.13  | 0.86 |
| AS | PF3D7_0601700 | = | 1.27  | 0.57 |
| AS | PF3D7_1001900 | = | 1.28  | 0.99 |
| AS | PF3D7_1409500 | = | 1.44  | 0.99 |
| AS | PF3D7_0916700 | = | 2.01  | 1.00 |
| AS | PF3D7_0402000 | = | 1.83  | 0.99 |

|    |               |   |      |      |
|----|---------------|---|------|------|
| AS | PF3D7_0102600 | = | 0.68 | 0.99 |
| AS | PF3D7_1433400 | = | 1.57 | 1.00 |
| AS | PF3D7_0322000 | = | 1.58 | 0.99 |
| AS | PF3D7_0623900 | = | 1.52 | 0.89 |
| AS | PF3D7_1013500 | = | 2.78 | 0.92 |

|    |               |   |      |      |
|----|---------------|---|------|------|
| AL | PF3D7_0811300 | = | 0.56 | 0.97 |
| AL | PF3D7_1305500 | = | 0.58 | 0.98 |
| AL | PF3D7_0615900 | = | 0.48 | 0.98 |
| AL | PF3D7_1122900 | = | 0.45 | 0.96 |
| AL | PF3D7_1141900 | = | 0.30 | 1.00 |
| AL | PF3D7_1475600 | = | 0.53 | 0.99 |
| AL | PF3D7_0211100 | = | 0.81 | 1.00 |
| AL | PF3D7_0203000 | = | 0.31 | 0.82 |
| AL | PF3D7_0404600 | = | 1.13 | 1.00 |
| AL | PF3D7_0416500 | = | 0.36 | 0.87 |
| AL | PF3D7_1018400 | = | 0.53 | 0.90 |
| AL | PF3D7_0511500 | = | 5.00 | 0.99 |
| AL | PF3D7_1360200 | = | 2.80 | 0.96 |
| AL | PF3D7_0611800 | = | 1.64 | 1.00 |
| AL | PF3D7_0619900 | = | 1.14 | 0.99 |
| AL | PF3D7_0521900 | = | 1.57 | 0.96 |
| AL | PF3D7_1219300 | = | 1.34 | 0.97 |
| AL | PF3D7_1133700 | = | 0.92 | 0.98 |
| AL | PF3D7_0808700 | = | 0.71 | 0.99 |
| AL | PF3D7_1136000 | = | 1.30 | 0.99 |
| AL | PF3D7_0931000 | = | 1.60 | 0.97 |
| AL | PF3D7_0830900 | = | 2.19 | 0.94 |
| AL | PF3D7_1231800 | = | 4.50 | 0.98 |
| AL | PF3D7_1035800 | = | 1.50 | 0.97 |
| AL | PF3D7_1444100 | = | 2.10 | 0.93 |
| AL | PF3D7_1138900 | = | 1.66 | 0.97 |
| AL | PF3D7_1441800 | = | 1.03 | 1.00 |
| AL | PF3D7_1345800 | = | 3.02 | 0.98 |
| AL | PF3D7_1432400 | = | 0.80 | 0.98 |
| AL | PF3D7_0819800 | = | 1.04 | 0.99 |
| AL | PF3D7_1207800 | = | 2.38 | 0.99 |
| AL | PF3D7_1143500 | = | 1.32 | 0.99 |
| AL | PF3D7_1001600 | = | 1.20 | 0.95 |
| AL | PF3D7_1019400 | = | 1.91 | 1.00 |
| AL | PF3D7_1311900 | = | 1.82 | 0.97 |
| AL | PF3D7_1035700 | = | 1.16 | 0.97 |
| AL | PF3D7_1103100 | = | 1.38 | 0.93 |
| AL | PF3D7_0812500 | = | 1.09 | 1.00 |
| AL | PF3D7_1216100 | = | 0.45 | 0.94 |
| AL | PF3D7_0206100 | = | 1.08 | 0.99 |
| AL | PF3D7_1352500 | = | 1.08 | 0.95 |
| AL | PF3D7_1226900 | = | 0.90 | 0.96 |
| AL | PF3D7_1368800 | = | 1.39 | 0.93 |
| AL | PF3D7_1432400 | = | 0.70 | 0.94 |

|    |               |   |      |      |
|----|---------------|---|------|------|
| AL | PF3D7_1343900 | = | 0.80 | 0.98 |
| AL | PF3D7_1328800 | = | 1.14 | 0.87 |
| AL | PF3D7_1138700 | = | 1.44 | 1.00 |
| AL | PF3D7_1327100 | = | 0.69 | 1.00 |
| AL | PF3D7_1136600 | = | 0.85 | 1.00 |
| AL | PF3D7_0902200 | = | 0.73 | 1.00 |
| AL | PF3D7_0727100 | = | 1.92 | 0.99 |
| AL | PF3D7_0105500 | = | 0.32 | 0.99 |
| AL | PF3D7_1126100 | = | 0.46 | 0.97 |
| AL | PF3D7_1343700 | = | 0.49 | 0.99 |
| AL | PF3D7_1330500 | = | 0.79 | 1.00 |
| AL | PF3D7_1343000 | = | 0.82 | 0.99 |
| AL | PF3D7_1302000 | = | 0.60 | 0.98 |
| AL | PF3D7_1107900 | = | 0.50 | 0.99 |
| AL | PF3D7_0606000 | = | 0.72 | 0.99 |
| AL | PF3D7_0614500 | = | 1.19 | 1.00 |
| AL | PF3D7_0203700 | = | 0.84 | 0.99 |
| AL | PF3D7_0601700 | = | 1.28 | 1.00 |
| AL | PF3D7_1001900 | = | 2.25 | 0.98 |
| AL | PF3D7_1409500 | = | 0.65 | 0.98 |
| AL | PF3D7_0916700 | = | 1.79 | 0.99 |
| AL | PF3D7_0402000 | = | 2.43 | 0.95 |
| AL | PF3D7_0102600 | = | 0.52 | 0.97 |
| AL | PF3D7_1433400 | = | 2.44 | 1.00 |
| AL | PF3D7_0322000 | = | 0.91 | 0.98 |
| AL | PF3D7_0623900 | = | 0.98 | 1.00 |
| AL | PF3D7_1013500 | = | 0.79 | 0.99 |

|       |               |   |      |      |
|-------|---------------|---|------|------|
| C-MIR | PF3D7_0811300 | = | 0.16 | 0.95 |
| C-MIR | PF3D7_1305500 | = | 0.35 | 0.94 |
| C-MIR | PF3D7_0615900 | = | 1.32 | 0.99 |
| C-MIR | PF3D7_1122900 | = | 1.20 | 0.93 |
| C-MIR | PF3D7_1141900 | = | 0.48 | 0.97 |
| C-MIR | PF3D7_1475600 | = | 0.38 | 0.96 |
| C-MIR | PF3D7_0211100 | = | 0.86 | 1.00 |
| C-MIR | PF3D7_0203000 | = | 0.00 | 0.50 |
| C-MIR | PF3D7_0404600 | = | 0.71 | 0.95 |
| C-MIR | PF3D7_0416500 | = | 3.91 | 0.91 |
| C-MIR | PF3D7_1018400 | = | 1.57 | 0.95 |
| C-MIR | PF3D7_0511500 | = | 0.75 | 0.98 |
| C-MIR | PF3D7_1360200 | = | 0.84 | 0.90 |
| C-MIR | PF3D7_0611800 | = | 2.65 | 0.99 |
| C-MIR | PF3D7_0619900 | = | 2.21 | 0.99 |
| C-MIR | PF3D7_0521900 | = | 4.02 | 1.00 |
| C-MIR | PF3D7_1219300 | = | 3.34 | 0.96 |
| C-MIR | PF3D7_1133700 | = | 2.34 | 0.94 |
| C-MIR | PF3D7_0808700 | = | 1.29 | 0.98 |
| C-MIR | PF3D7_1136000 | = | 2.18 | 0.94 |
| C-MIR | PF3D7_0931000 | = | 7.02 | 0.98 |
| C-MIR | PF3D7_0830900 | = | 8.82 | 0.94 |

|       |               |   |      |      |
|-------|---------------|---|------|------|
| C-MIR | PF3D7_1231800 | = | 9.94 | 0.93 |
| C-MIR | PF3D7_1035800 | = | 6.01 | 0.96 |
| C-MIR | PF3D7_1444100 | = | 4.00 | 0.95 |
| C-MIR | PF3D7_1138900 | = | 8.87 | 0.92 |
| C-MIR | PF3D7_1441800 | = | 0.61 | 0.96 |
| C-MIR | PF3D7_1345800 | = | 2.07 | 0.99 |
| C-MIR | PF3D7_1432400 | = | 1.83 | 0.94 |
| C-MIR | PF3D7_0819800 | = | 0.32 | 0.93 |
| C-MIR | PF3D7_1207800 | = | 2.35 | 0.96 |
| C-MIR | PF3D7_1143500 | = | 0.50 | 0.96 |
| C-MIR | PF3D7_1001600 | = | 1.44 | 0.98 |
| C-MIR | PF3D7_1019400 | = | 1.32 | 0.91 |
| C-MIR | PF3D7_1311900 | = | 2.14 | 0.99 |
| C-MIR | PF3D7_1035700 | = | 1.26 | 0.97 |
| C-MIR | PF3D7_1103100 | = | 1.37 | 0.96 |
| C-MIR | PF3D7_0812500 | = | 2.10 | 0.90 |
| C-MIR | PF3D7_1216100 | = | 0.06 | 0.99 |
| C-MIR | PF3D7_0206100 | = | 0.85 | 0.99 |
| C-MIR | PF3D7_1352500 | = | 0.95 | 0.98 |
| C-MIR | PF3D7_1226900 | = | 0.24 | 0.99 |
| C-MIR | PF3D7_1368800 | = | 0.95 | 0.98 |
| C-MIR | PF3D7_1432400 | = | 0.90 | 0.97 |
| C-MIR | PF3D7_1343900 | = | 0.60 | 0.96 |
| C-MIR | PF3D7_1328800 | = | 0.82 | 0.96 |
| C-MIR | PF3D7_1138700 | = | 0.89 | 1.00 |
| C-MIR | PF3D7_1327100 | = | 0.18 | 0.99 |
| C-MIR | PF3D7_1136600 | = | 0.57 | 0.98 |
| C-MIR | PF3D7_0902200 | = | 0.69 | 0.96 |
| C-MIR | PF3D7_0727100 | = | 1.27 | 1.00 |
| C-MIR | PF3D7_0105500 | = | 0.17 | 0.99 |
| C-MIR | PF3D7_1126100 | = | 0.29 | 0.98 |
| C-MIR | PF3D7_1343700 | = | 0.22 | 0.99 |
| C-MIR | PF3D7_1330500 | = | 2.68 | 0.99 |
| C-MIR | PF3D7_1343000 | = | 1.29 | 0.98 |
| C-MIR | PF3D7_1302000 | = | 0.77 | 0.98 |
| C-MIR | PF3D7_1107900 | = | 1.11 | 0.99 |
| C-MIR | PF3D7_0606000 | = | 2.94 | 0.99 |
| C-MIR | PF3D7_0614500 | = | 5.85 | 0.99 |
| C-MIR | PF3D7_0203700 | = | 4.64 | 0.97 |
| C-MIR | PF3D7_0601700 | = | 4.33 | 0.99 |
| C-MIR | PF3D7_1001900 | = | 4.96 | 0.97 |
| C-MIR | PF3D7_1409500 | = | 2.15 | 0.98 |
| C-MIR | PF3D7_0916700 | = | 1.59 | 0.98 |
| C-MIR | PF3D7_0402000 | = | 2.59 | 0.99 |
| C-MIR | PF3D7_0102600 | = | 0.06 | 0.79 |
| C-MIR | PF3D7_1433400 | = | 1.18 | 0.98 |
| C-MIR | PF3D7_0322000 | = | 4.49 | 0.98 |
| C-MIR | PF3D7_0623900 | = | 2.82 | 0.99 |
| C-MIR | PF3D7_1013500 | = | 0.81 | 0.73 |

|       |               |   |      |      |
|-------|---------------|---|------|------|
| T-MIR | PF3D7_0811300 | = | 0.10 | 0.91 |
| T-MIR | PF3D7_1305500 | = | 0.51 | 0.97 |
| T-MIR | PF3D7_0615900 | = | 1.40 | 1.00 |
| T-MIR | PF3D7_1122900 | = | 0.95 | 0.93 |
| T-MIR | PF3D7_1141900 | = | 0.91 | 0.99 |
| T-MIR | PF3D7_1475600 | = | 0.81 | 0.98 |
| T-MIR | PF3D7_0211100 | = | 1.33 | 1.00 |
| T-MIR | PF3D7_0203000 | = | 0.21 | 0.94 |
| T-MIR | PF3D7_0404600 | = | 0.82 | 1.00 |
| T-MIR | PF3D7_0416500 | = | 1.76 | 0.95 |
| T-MIR | PF3D7_1018400 | = | 0.76 | 0.97 |
| T-MIR | PF3D7_0511500 | = | 0.41 | 0.98 |
| T-MIR | PF3D7_1360200 | = | 1.81 | 0.98 |
| T-MIR | PF3D7_0611800 | = | 1.00 | 0.98 |
| T-MIR | PF3D7_0619900 | = | 1.06 | 1.00 |
| T-MIR | PF3D7_0521900 | = | 2.25 | 0.99 |
| T-MIR | PF3D7_1219300 | = | 1.15 | 0.98 |
| T-MIR | PF3D7_1133700 | = | 1.68 | 0.96 |
| T-MIR | PF3D7_0808700 | = | 1.12 | 0.98 |
| T-MIR | PF3D7_1136000 | = | 1.90 | 0.98 |
| T-MIR | PF3D7_0931000 | = | 6.40 | 0.97 |
| T-MIR | PF3D7_0830900 | = | 7.99 | 0.99 |
| T-MIR | PF3D7_1231800 | = | 8.71 | 0.98 |
| T-MIR | PF3D7_1035800 | = | 5.97 | 0.99 |
| T-MIR | PF3D7_1444100 | = | 5.48 | 0.98 |
| T-MIR | PF3D7_1138900 | = | 8.84 | 0.99 |
| T-MIR | PF3D7_1441800 | = | 1.07 | 0.99 |
| T-MIR | PF3D7_1345800 | = | 0.75 | 1.00 |
| T-MIR | PF3D7_1432400 | = | 2.60 | 0.99 |
| T-MIR | PF3D7_0819800 | = | 1.41 | 0.98 |
| T-MIR | PF3D7_1207800 | = | 1.70 | 0.99 |
| T-MIR | PF3D7_1143500 | = | 0.65 | 0.99 |
| T-MIR | PF3D7_1001600 | = | 1.28 | 1.00 |
| T-MIR | PF3D7_1019400 | = | 2.26 | 1.00 |
| T-MIR | PF3D7_1311900 | = | 1.70 | 1.00 |
| T-MIR | PF3D7_1035700 | = | 1.49 | 0.98 |
| T-MIR | PF3D7_1103100 | = | 1.23 | 1.00 |
| T-MIR | PF3D7_0812500 | = | 2.10 | 0.96 |
| T-MIR | PF3D7_1216100 | = | 0.04 | 0.97 |
| T-MIR | PF3D7_0206100 | = | 0.93 | 0.98 |
| T-MIR | PF3D7_1352500 | = | 0.88 | 0.99 |
| T-MIR | PF3D7_1226900 | = | 0.17 | 0.98 |
| T-MIR | PF3D7_1368800 | = | 0.93 | 0.98 |
| T-MIR | PF3D7_1432400 | = | 0.70 | 0.96 |
| T-MIR | PF3D7_1343900 | = | 0.61 | 0.97 |
| T-MIR | PF3D7_1328800 | = | 0.77 | 0.93 |
| T-MIR | PF3D7_1138700 | = | 0.94 | 1.00 |
| T-MIR | PF3D7_1327100 | = | 0.22 | 0.99 |
| T-MIR | PF3D7_1136600 | = | 0.43 | 0.97 |
| T-MIR | PF3D7_0902200 | = | 1.05 | 0.96 |
| T-MIR | PF3D7_0727100 | = | 1.23 | 0.99 |
| T-MIR | PF3D7_0105500 | = | 0.30 | 0.98 |

|       |               |   |      |      |
|-------|---------------|---|------|------|
| T-MIR | PF3D7_1126100 | = | 0.33 | 0.98 |
| T-MIR | PF3D7_1343700 | = | 0.29 | 0.99 |
| T-MIR | PF3D7_1330500 | = | 1.76 | 1.00 |
| T-MIR | PF3D7_1343000 | = | 0.97 | 0.99 |
| T-MIR | PF3D7_1302000 | = | 1.27 | 0.99 |
| T-MIR | PF3D7_1107900 | = | 0.59 | 0.98 |
| T-MIR | PF3D7_0606000 | = | 1.71 | 0.98 |
| T-MIR | PF3D7_0614500 | = | 2.47 | 0.99 |
| T-MIR | PF3D7_0203700 | = | 2.71 | 0.98 |
| T-MIR | PF3D7_0601700 | = | 2.74 | 0.99 |
| T-MIR | PF3D7_1001900 | = | 4.58 | 0.99 |
| T-MIR | PF3D7_1409500 | = | 2.06 | 0.98 |
| T-MIR | PF3D7_0916700 | = | 1.60 | 0.98 |
| T-MIR | PF3D7_0402000 | = | 3.30 | 0.99 |
| T-MIR | PF3D7_0102600 | = | 1.02 | 0.98 |
| T-MIR | PF3D7_1433400 | = | 1.88 | 0.99 |
| T-MIR | PF3D7_0322000 | = | 6.12 | 1.00 |
| T-MIR | PF3D7_0623900 | = | 1.64 | 0.98 |
| T-MIR | PF3D7_1013500 | = | 2.76 | 1.00 |

|    |               |   |      |      |
|----|---------------|---|------|------|
| SP | PF3D7_0811300 | = | 0.51 | 0.96 |
| SP | PF3D7_1305500 | = | 0.41 | 0.96 |
| SP | PF3D7_0615900 | = | 0.94 | 0.99 |
| SP | PF3D7_1122900 | = | 0.57 | 0.94 |
| SP | PF3D7_1141900 | = | 0.42 | 0.98 |
| SP | PF3D7_1475600 | = | 0.67 | 1.00 |
| SP | PF3D7_0211100 | = | 1.03 | 1.00 |
| SP | PF3D7_0203000 | = | 0.17 | 0.86 |
| SP | PF3D7_0404600 | = | 1.10 | 1.00 |
| SP | PF3D7_0416500 | = | 1.08 | 1.00 |
| SP | PF3D7_1018400 | = | 0.87 | 0.99 |
| SP | PF3D7_0511500 | = | 1.00 | 1.00 |
| SP | PF3D7_1360200 | = | 0.00 | 0.89 |
| SP | PF3D7_0611800 | = | 1.12 | 0.98 |
| SP | PF3D7_0619900 | = | 0.52 | 1.00 |
| SP | PF3D7_0521900 | = | 1.15 | 1.00 |
| SP | PF3D7_1219300 | = | 0.97 | 0.96 |
| SP | PF3D7_1133700 | = | 0.64 | 0.91 |
| SP | PF3D7_0808700 | = | 1.20 | 1.00 |
| SP | PF3D7_1136000 | = | 1.20 | 0.91 |
| SP | PF3D7_0931000 | = | 2.09 | 0.98 |
| SP | PF3D7_0830900 | = | 1.97 | 0.97 |
| SP | PF3D7_1231800 | = | 2.08 | 0.95 |
| SP | PF3D7_1035800 | = | 1.96 | 0.99 |
| SP | PF3D7_1444100 | = | 2.04 | 0.98 |
| SP | PF3D7_1138900 | = | 2.64 | 0.97 |
| SP | PF3D7_1441800 | = | 0.64 | 0.99 |
| SP | PF3D7_1345800 | = | 0.64 | 0.99 |
| SP | PF3D7_1432400 | = | 1.02 | 1.00 |
| SP | PF3D7_0819800 | = | 0.91 | 1.00 |



|    |               |   |      |      |
|----|---------------|---|------|------|
| SP | PF3D7_1207800 | = | 0.91 | 1.00 |
| SP | PF3D7_1143500 | = | 0.98 | 1.00 |
| SP | PF3D7_1001600 | = | 0.76 | 1.00 |
| SP | PF3D7_1019400 | = | 0.74 | 0.99 |
| SP | PF3D7_1311900 | = | 0.82 | 1.00 |
| SP | PF3D7_1035700 | = | 1.65 | 0.97 |
| SP | PF3D7_1103100 | = | 0.82 | 0.99 |
| SP | PF3D7_0812500 | = | 0.25 | 0.90 |
| SP | PF3D7_1216100 | = | 0.80 | 0.99 |
| SP | PF3D7_0206100 | = | 1.00 | 0.99 |
| SP | PF3D7_1352500 | = | 0.98 | 0.99 |
| SP | PF3D7_1226900 | = | 0.60 | 0.99 |
| SP | PF3D7_1368800 | = | 1.81 | 0.99 |
| SP | PF3D7_1432400 | = | 1.01 | 0.97 |
| SP | PF3D7_1343900 | = | 0.90 | 0.99 |
| SP | PF3D7_1328800 | = | 0.96 | 0.95 |
| SP | PF3D7_1138700 | = | 1.35 | 0.99 |
| SP | PF3D7_1327100 | = | 0.54 | 0.99 |
| SP | PF3D7_1136600 | = | 0.62 | 1.00 |
| SP | PF3D7_0902200 | = | 0.83 | 0.96 |
| SP | PF3D7_0727100 | = | 0.88 | 1.00 |
| SP | PF3D7_0105500 | = | 0.61 | 0.99 |
| SP | PF3D7_1126100 | = | 0.32 | 0.98 |
| SP | PF3D7_1343700 | = | 0.35 | 0.99 |
| SP | PF3D7_1330500 | = | 1.30 | 1.00 |
| SP | PF3D7_1343000 | = | 0.95 | 0.98 |
| SP | PF3D7_1302000 | = | 1.25 | 0.99 |
| SP | PF3D7_1107900 | = | 0.76 | 0.99 |
| SP | PF3D7_0606000 | = | 1.26 | 0.99 |
| SP | PF3D7_0614500 | = | 1.34 | 0.97 |
| SP | PF3D7_0203700 | = | 1.28 | 1.00 |
| SP | PF3D7_0601700 | = | 1.26 | 1.00 |
| SP | PF3D7_1001900 | = | 0.58 | 0.97 |
| SP | PF3D7_1409500 | = | 0.76 | 0.98 |
| SP | PF3D7_0916700 | = | 0.43 | 0.98 |
| SP | PF3D7_0402000 | = | 1.09 | 0.99 |
| SP | PF3D7_0102600 | = | 0.63 | 0.99 |
| SP | PF3D7_1433400 | = | 0.33 | 0.95 |
| SP | PF3D7_0322000 | = | 1.48 | 1.00 |
| SP | PF3D7_0623900 | = | 0.27 | 0.97 |
| SP | PF3D7_1013500 | = | 1.44 | 0.95 |

|    |               |   |      |      |
|----|---------------|---|------|------|
| AM | PF3D7_0811300 | = | 0.17 | 0.90 |
| AM | PF3D7_1305500 | = | 0.41 | 0.95 |
| AM | PF3D7_0615900 | = | 0.54 | 0.97 |
| AM | PF3D7_1122900 | = | 0.38 | 0.93 |
| AM | PF3D7_1141900 | = | 0.25 | 0.96 |
| AM | PF3D7_1475600 | = | 0.42 | 0.98 |
| AM | PF3D7_0211100 | = | 1.79 | 1.00 |
| AM | PF3D7_0203000 | = | 0.05 | 0.74 |

|    |               |   |       |      |
|----|---------------|---|-------|------|
| AM | PF3D7_0404600 | = | 1.97  | 0.97 |
| AM | PF3D7_0416500 | = | 1.21  | 0.99 |
| AM | PF3D7_1018400 | = | 0.54  | 0.98 |
| AM | PF3D7_0511500 | = | 0.50  | 0.99 |
| AM | PF3D7_1360200 | = | 0.82  | 0.87 |
| AM | PF3D7_0611800 | = | 1.14  | 0.99 |
| AM | PF3D7_0619900 | = | 0.70  | 1.00 |
| AM | PF3D7_0521900 | = | 0.92  | 1.00 |
| AM | PF3D7_1219300 | = | 0.88  | 1.00 |
| AM | PF3D7_1133700 | = | 0.96  | 0.92 |
| AM | PF3D7_0808700 | = | 0.54  | 0.98 |
| AM | PF3D7_1136000 | = | 1.62  | 0.98 |
| AM | PF3D7_0931000 | = | 3.29  | 0.99 |
| AM | PF3D7_0830900 | = | 6.13  | 0.93 |
| AM | PF3D7_1231800 | = | 6.60  | 0.95 |
| AM | PF3D7_1035800 | = | 1.45  | 0.96 |
| AM | PF3D7_1444100 | = | 3.08  | 0.95 |
| AM | PF3D7_1138900 | = | 3.33  | 0.94 |
| AM | PF3D7_1441800 | = | 0.37  | 0.93 |
| AM | PF3D7_1345800 | = | 2.78  | 0.99 |
| AM | PF3D7_1432400 | = | 0.79  | 0.98 |
| AM | PF3D7_0819800 | = | 0.43  | 0.98 |
| AM | PF3D7_1207800 | = | 2.94  | 1.00 |
| AM | PF3D7_1143500 | = | 0.68  | 1.00 |
| AM | PF3D7_1001600 | = | 1.08  | 1.00 |
| AM | PF3D7_1019400 | = | 0.58  | 0.97 |
| AM | PF3D7_1311900 | = | 4.60  | 0.99 |
| AM | PF3D7_1035700 | = | 2.44  | 0.91 |
| AM | PF3D7_1103100 | = | 2.93  | 1.00 |
| AM | PF3D7_0812500 | = | 5.92  | 0.86 |
| AM | PF3D7_1216100 | = | 0.75  | 0.98 |
| AM | PF3D7_0206100 | = | 10.58 | 0.90 |
| AM | PF3D7_1352500 | = | 9.29  | 0.87 |
| AM | PF3D7_1226900 | = | 1.40  | 0.98 |
| AM | PF3D7_1368800 | = | 16.88 | 0.87 |
| AM | PF3D7_1432400 | = | 2.34  | 0.93 |
| AM | PF3D7_1343900 | = | 4.40  | 0.85 |
| AM | PF3D7_1328800 | = | 7.46  | 0.88 |
| AM | PF3D7_1138700 | = | 0.85  | 0.99 |
| AM | PF3D7_1327100 | = | 0.29  | 0.98 |
| AM | PF3D7_1136600 | = | 0.67  | 0.99 |
| AM | PF3D7_0902200 | = | 0.70  | 0.96 |
| AM | PF3D7_0727100 | = | 1.20  | 0.99 |
| AM | PF3D7_0105500 | = | 0.18  | 0.98 |
| AM | PF3D7_1126100 | = | 0.52  | 0.97 |
| AM | PF3D7_1343700 | = | 0.49  | 0.97 |
| AM | PF3D7_1330500 | = | 0.67  | 0.98 |
| AM | PF3D7_1343000 | = | 0.69  | 0.99 |
| AM | PF3D7_1302000 | = | 0.55  | 0.98 |
| AM | PF3D7_1107900 | = | 0.37  | 0.99 |
| AM | PF3D7_0606000 | = | 1.26  | 0.98 |
| AM | PF3D7_0614500 | = | 1.32  | 1.00 |

|    |               |   |      |      |
|----|---------------|---|------|------|
| AM | PF3D7_0203700 | = | 1.03 | 0.97 |
| AM | PF3D7_0601700 | = | 1.79 | 0.99 |
| AM | PF3D7_1001900 | = | 7.42 | 0.98 |
| AM | PF3D7_1409500 | = | 3.28 | 0.99 |
| AM | PF3D7_0916700 | = | 5.29 | 0.99 |
| AM | PF3D7_0402000 | = | 4.42 | 1.00 |
| AM | PF3D7_0102600 | = | 1.13 | 0.99 |
| AM | PF3D7_1433400 | = | 7.67 | 0.99 |
| AM | PF3D7_0322000 | = | 1.35 | 0.98 |
| AM | PF3D7_0623900 | = | 3.05 | 0.82 |
| AM | PF3D7_1013500 | = | 1.09 | 0.95 |

|     |               |   |      |      |
|-----|---------------|---|------|------|
| MFQ | PF3D7_0811300 | = | 1.00 | 0.95 |
| MFQ | PF3D7_1305500 | = | 1.15 | 0.99 |
| MFQ | PF3D7_0615900 | = | 1.00 | 0.99 |
| MFQ | PF3D7_1122900 | = | 1.00 | 0.98 |
| MFQ | PF3D7_1141900 | = | 1.00 | 0.99 |
| MFQ | PF3D7_1475600 | = | 1.00 | 0.98 |
| MFQ | PF3D7_0211100 | = | 1.00 | 0.92 |
| MFQ | PF3D7_0203000 | = | 1.00 | 0.99 |
| MFQ | PF3D7_0404600 | = | 1.00 | 1.00 |
| MFQ | PF3D7_0416500 | = | 0.52 | 0.97 |
| MFQ | PF3D7_1018400 | = | 0.50 | 0.99 |
| MFQ | PF3D7_0511500 | = | 0.39 | 0.99 |
| MFQ | PF3D7_1360200 | = | 1.00 | 0.91 |
| MFQ | PF3D7_0611800 | = | 0.93 | 0.98 |
| MFQ | PF3D7_0619900 | = | 0.46 | 1.00 |
| MFQ | PF3D7_0521900 | = | 0.51 | 1.00 |
| MFQ | PF3D7_1219300 | = | 0.43 | 0.97 |
| MFQ | PF3D7_1133700 | = | 1.01 | 0.99 |
| MFQ | PF3D7_0808700 | = | 0.53 | 0.92 |
| MFQ | PF3D7_1136000 | = | 1.72 | 1.00 |
| MFQ | PF3D7_0931000 | = | 1.90 | 1.00 |
| MFQ | PF3D7_0830900 | = | 2.65 | 0.99 |
| MFQ | PF3D7_1231800 | = | 2.80 | 0.99 |
| MFQ | PF3D7_1035800 | = | 1.01 | 0.97 |
| MFQ | PF3D7_1444100 | = | 1.80 | 0.99 |
| MFQ | PF3D7_1138900 | = | 1.66 | 0.98 |
| MFQ | PF3D7_1441800 | = | 3.85 | 0.99 |
| MFQ | PF3D7_1345800 | = | 4.10 | 0.93 |
| MFQ | PF3D7_1432400 | = | 0.90 | 0.99 |
| MFQ | PF3D7_0819800 | = | 1.50 | 1.00 |
| MFQ | PF3D7_1207800 | = | 2.18 | 1.00 |
| MFQ | PF3D7_1143500 | = | 0.56 | 0.99 |
| MFQ | PF3D7_1001600 | = | 1.75 | 1.00 |
| MFQ | PF3D7_1019400 | = | 1.28 | 0.99 |
| MFQ | PF3D7_1311900 | = | 2.35 | 1.00 |
| MFQ | PF3D7_1035700 | = | 4.56 | 0.99 |
| MFQ | PF3D7_1103100 | = | 1.16 | 0.98 |
| MFQ | PF3D7_0812500 | = | 0.77 | 0.90 |

|     |               |   |      |      |
|-----|---------------|---|------|------|
| MFQ | PF3D7_1216100 | = | 0.69 | 0.98 |
| MFQ | PF3D7_0206100 | = | 3.53 | 0.94 |
| MFQ | PF3D7_1352500 | = | 3.83 | 0.93 |
| MFQ | PF3D7_1226900 | = | 0.70 | 0.99 |
| MFQ | PF3D7_1368800 | = | 4.96 | 0.94 |
| MFQ | PF3D7_1432400 | = | 2.54 | 0.91 |
| MFQ | PF3D7_1343900 | = | 1.70 | 0.91 |
| MFQ | PF3D7_1328800 | = | 2.63 | 0.89 |
| MFQ | PF3D7_1138700 | = | 1.01 | 0.98 |
| MFQ | PF3D7_1327100 | = | 0.30 | 0.99 |
| MFQ | PF3D7_1136600 | = | 0.62 | 0.97 |
| MFQ | PF3D7_0902200 | = | 0.90 | 0.97 |
| MFQ | PF3D7_0727100 | = | 0.91 | 0.99 |
| MFQ | PF3D7_0105500 | = | 0.40 | 0.98 |
| MFQ | PF3D7_1126100 | = | 0.77 | 0.91 |
| MFQ | PF3D7_1343700 | = | 0.57 | 0.99 |
| MFQ | PF3D7_1330500 | = | 0.74 | 0.98 |
| MFQ | PF3D7_1343000 | = | 1.29 | 0.99 |
| MFQ | PF3D7_1302000 | = | 1.06 | 0.99 |
| MFQ | PF3D7_1107900 | = | 0.77 | 0.99 |
| MFQ | PF3D7_0606000 | = | 1.22 | 1.00 |
| MFQ | PF3D7_0614500 | = | 1.50 | 0.99 |
| MFQ | PF3D7_0203700 | = | 1.91 | 0.99 |
| MFQ | PF3D7_0601700 | = | 1.54 | 1.00 |
| MFQ | PF3D7_1001900 | = | 3.12 | 0.98 |
| MFQ | PF3D7_1409500 | = | 0.87 | 0.98 |
| MFQ | PF3D7_0916700 | = | 0.88 | 0.99 |
| MFQ | PF3D7_0402000 | = | 1.15 | 1.00 |
| MFQ | PF3D7_0102600 | = | 0.88 | 0.99 |
| MFQ | PF3D7_1433400 | = | 1.19 | 0.98 |
| MFQ | PF3D7_0322000 | = | 1.51 | 1.00 |
| MFQ | PF3D7_0623900 | = | 2.48 | 0.91 |
| MFQ | PF3D7_1013500 | = | 0.02 | 0.98 |

|      |               |   |       |      |
|------|---------------|---|-------|------|
| LUMF | PF3D7_0811300 | = | 0.25  | 0.95 |
| LUMF | PF3D7_1305500 | = | 0.42  | 0.96 |
| LUMF | PF3D7_0615900 | = | 0.66  | 0.94 |
| LUMF | PF3D7_1122900 | = | 0.83  | 0.97 |
| LUMF | PF3D7_1141900 | = | 0.40  | 0.97 |
| LUMF | PF3D7_1475600 | = | 34.56 | 0.73 |
| LUMF | PF3D7_0211100 | = | 1.25  | 1.00 |
| LUMF | PF3D7_0203000 | = | 0.21  | 0.93 |
| LUMF | PF3D7_0404600 | = | 0.67  | 0.96 |
| LUMF | PF3D7_0416500 | = | 0.15  | 0.96 |
| LUMF | PF3D7_1018400 | = | 0.22  | 0.96 |
| LUMF | PF3D7_0511500 | = | 0.11  | 0.94 |
| LUMF | PF3D7_1360200 | = | 1.05  | 0.92 |
| LUMF | PF3D7_0611800 | = | 0.97  | 0.94 |
| LUMF | PF3D7_0619900 | = | 0.44  | 0.97 |

|      |               |   |       |      |
|------|---------------|---|-------|------|
| LUMF | PF3D7_0521900 | = | 4.60  | 0.96 |
| LUMF | PF3D7_1219300 | = | 0.82  | 0.91 |
| LUMF | PF3D7_1133700 | = | 4.84  | 0.94 |
| LUMF | PF3D7_0808700 | = | 2.45  | 0.91 |
| LUMF | PF3D7_1136000 | = | 9.30  | 0.98 |
| LUMF | PF3D7_0931000 | = | 20.59 | 0.98 |
| LUMF | PF3D7_0830900 | = | 21.98 | 0.92 |
| LUMF | PF3D7_1231800 | = | 24.91 | 0.91 |
| LUMF | PF3D7_1035800 | = | 12.52 | 0.97 |
| LUMF | PF3D7_1444100 | = | 21.35 | 0.97 |
| LUMF | PF3D7_1138900 | = | 15.96 | 0.96 |
| LUMF | PF3D7_1441800 | = | 0.44  | 0.84 |
| LUMF | PF3D7_1345800 | = | 2.59  | 1.00 |
| LUMF | PF3D7_1432400 | = | 0.93  | 1.00 |
| LUMF | PF3D7_0819800 | = | 0.48  | 0.97 |
| LUMF | PF3D7_1207800 | = | 0.88  | 0.99 |
| LUMF | PF3D7_1143500 | = | 0.22  | 0.93 |
| LUMF | PF3D7_1001600 | = | 0.63  | 0.96 |
| LUMF | PF3D7_1019400 | = | 0.39  | 0.95 |
| LUMF | PF3D7_1311900 | = | 34.56 | 0.98 |
| LUMF | PF3D7_1035700 | = | 1.09  | 0.93 |
| LUMF | PF3D7_1103100 | = | 4.00  | 0.92 |
| LUMF | PF3D7_0812500 | = | 3.01  | 0.89 |
| LUMF | PF3D7_1216100 | = | 0.79  | 0.98 |
| LUMF | PF3D7_0206100 | = | 2.34  | 0.99 |
| LUMF | PF3D7_1352500 | = | 1.43  | 1.00 |
| LUMF | PF3D7_1226900 | = | 0.72  | 0.96 |
| LUMF | PF3D7_1368800 | = | 2.95  | 1.00 |
| LUMF | PF3D7_1432400 | = | 3.16  | 0.99 |
| LUMF | PF3D7_1343900 | = | 0.76  | 1.00 |
| LUMF | PF3D7_1328800 | = | 2.56  | 1.00 |
| LUMF | PF3D7_1138700 | = | 0.75  | 1.00 |
| LUMF | PF3D7_1327100 | = | 0.05  | 0.96 |
| LUMF | PF3D7_1136600 | = | 0.41  | 0.96 |
| LUMF | PF3D7_0902200 | = | 0.49  | 0.98 |
| LUMF | PF3D7_0727100 | = | 0.63  | 0.96 |
| LUMF | PF3D7_0105500 | = | 0.01  | 0.96 |
| LUMF | PF3D7_1126100 | = | 0.15  | 0.98 |
| LUMF | PF3D7_1343700 | = | 0.03  | 0.97 |
| LUMF | PF3D7_1330500 | = | 2.20  | 0.99 |
| LUMF | PF3D7_1343000 | = | 1.35  | 0.99 |
| LUMF | PF3D7_1302000 | = | 2.40  | 0.99 |
| LUMF | PF3D7_1107900 | = | 0.23  | 0.95 |
| LUMF | PF3D7_0606000 | = | 2.50  | 0.94 |
| LUMF | PF3D7_0614500 | = | 2.16  | 0.97 |
| LUMF | PF3D7_0203700 | = | 1.79  | 0.94 |
| LUMF | PF3D7_0601700 | = | 2.05  | 0.97 |
| LUMF | PF3D7_1001900 | = | 2.98  | 0.98 |
| LUMF | PF3D7_1409500 | = | 0.56  | 0.98 |
| LUMF | PF3D7_0916700 | = | 0.78  | 0.99 |
| LUMF | PF3D7_0402000 | = | 0.94  | 0.97 |
| LUMF | PF3D7_0102600 | = | 0.74  | 0.96 |

|      |               |   |      |      |
|------|---------------|---|------|------|
| LUMF | PF3D7_1433400 | = | 1.14 | 0.97 |
| LUMF | PF3D7_0322000 | = | 1.38 | 0.97 |
| LUMF | PF3D7_0623900 | = | 1.12 | 0.98 |
| LUMF | PF3D7_1013500 | = | 0.11 | 0.97 |
|      |               |   |      |      |
| PIP  | PF3D7_0811300 | = | 0.32 | 0.93 |
| PIP  | PF3D7_1305500 | = | 0.74 | 0.95 |
| PIP  | PF3D7_0615900 | = | 1.12 | 0.97 |
| PIP  | PF3D7_1122900 | = | 0.43 | 0.92 |
| PIP  | PF3D7_1141900 | = | 0.50 | 0.97 |
| PIP  | PF3D7_1475600 | = | 0.67 | 0.97 |
| PIP  | PF3D7_0211100 | = | 0.19 | 1.00 |
| PIP  | PF3D7_0203000 | = | 0.28 | 0.94 |
| PIP  | PF3D7_0404600 | = | 0.73 | 0.92 |
| PIP  | PF3D7_0416500 | = | 0.26 | 0.86 |
| PIP  | PF3D7_1018400 | = | 0.82 | 0.94 |
| PIP  | PF3D7_0511500 | = | 0.77 | 0.98 |
| PIP  | PF3D7_1360200 | = | 0.61 | 0.89 |
| PIP  | PF3D7_0611800 | = | 0.93 | 0.96 |
| PIP  | PF3D7_0619900 | = | 0.73 | 1.00 |
| PIP  | PF3D7_0521900 | = | 1.07 | 0.99 |
| PIP  | PF3D7_1219300 | = | 0.97 | 0.92 |
| PIP  | PF3D7_1133700 | = | 0.99 | 0.95 |
| PIP  | PF3D7_0808700 | = | 1.15 | 0.94 |
| PIP  | PF3D7_1136000 | = | 1.14 | 0.99 |
| PIP  | PF3D7_0931000 | = | 1.57 | 0.94 |
| PIP  | PF3D7_0830900 | = | 0.66 | 0.82 |
| PIP  | PF3D7_1231800 | = | 1.98 | 0.93 |
| PIP  | PF3D7_1035800 | = | 1.86 | 0.98 |
| PIP  | PF3D7_1444100 | = | 1.92 | 0.94 |
| PIP  | PF3D7_1138900 | = | 0.68 | 0.84 |
| PIP  | PF3D7_1441800 | = | 0.60 | 0.90 |
| PIP  | PF3D7_1345800 | = | 1.20 | 0.98 |
| PIP  | PF3D7_1432400 | = | 0.76 | 0.97 |
| PIP  | PF3D7_0819800 | = | 0.71 | 0.95 |
| PIP  | PF3D7_1207800 | = | 0.82 | 1.00 |
| PIP  | PF3D7_1143500 | = | 0.72 | 0.94 |
| PIP  | PF3D7_1001600 | = | 0.68 | 1.00 |
| PIP  | PF3D7_1019400 | = | 0.85 | 0.94 |
| PIP  | PF3D7_1311900 | = | 0.62 | 0.96 |
| PIP  | PF3D7_1035700 | = | 0.70 | 0.90 |
| PIP  | PF3D7_1103100 | = | 0.63 | 0.96 |
| PIP  | PF3D7_0812500 | = | 0.31 | 0.87 |
| PIP  | PF3D7_1216100 | = | 0.90 | 0.98 |
| PIP  | PF3D7_0206100 | = | 1.05 | 0.99 |
| PIP  | PF3D7_1352500 | = | 1.05 | 0.99 |
| PIP  | PF3D7_1226900 | = | 0.66 | 0.97 |
| PIP  | PF3D7_1368800 | = | 1.13 | 0.99 |
| PIP  | PF3D7_1432400 | = | 1.14 | 0.98 |
| PIP  | PF3D7_1343900 | = | 0.83 | 1.00 |

|     |               |   |      |      |
|-----|---------------|---|------|------|
| PIP | PF3D7_1328800 | = | 0.82 | 0.98 |
| PIP | PF3D7_1138700 | = | 1.33 | 1.00 |
| PIP | PF3D7_1327100 | = | 0.51 | 0.99 |
| PIP | PF3D7_1136600 | = | 0.59 | 0.99 |
| PIP | PF3D7_0902200 | = | 0.74 | 0.97 |
| PIP | PF3D7_0727100 | = | 0.73 | 0.99 |
| PIP | PF3D7_0105500 | = | 0.28 | 0.98 |
| PIP | PF3D7_1126100 | = | 0.57 | 0.99 |
| PIP | PF3D7_1343700 | = | 0.23 | 0.99 |
| PIP | PF3D7_1330500 | = | 0.98 | 1.00 |
| PIP | PF3D7_1343000 | = | 0.59 | 0.98 |
| PIP | PF3D7_1302000 | = | 1.01 | 0.99 |
| PIP | PF3D7_1107900 | = | 1.17 | 0.98 |
| PIP | PF3D7_0606000 | = | 1.02 | 1.00 |
| PIP | PF3D7_0614500 | = | 1.07 | 0.99 |
| PIP | PF3D7_0203700 | = | 1.56 | 0.98 |
| PIP | PF3D7_0601700 | = | 0.65 | 0.99 |
| PIP | PF3D7_1001900 | = | 2.17 | 0.99 |
| PIP | PF3D7_1409500 | = | 0.98 | 0.98 |
| PIP | PF3D7_0916700 | = | 0.94 | 0.99 |
| PIP | PF3D7_0402000 | = | 1.21 | 0.99 |
| PIP | PF3D7_0102600 | = | 0.81 | 0.98 |
| PIP | PF3D7_1433400 | = | 1.02 | 0.99 |
| PIP | PF3D7_0322000 | = | 1.34 | 0.99 |
| PIP | PF3D7_0623900 | = | 1.82 | 0.98 |
|     | PF3D7_1013500 | = | 0.00 | 0.93 |

|      |               |   |      |      |
|------|---------------|---|------|------|
| PHEN | PF3D7_0811300 | = | 1.08 | 0.97 |
| PHEN | PF3D7_1305500 | = | 1.10 | 0.95 |
| PHEN | PF3D7_0615900 | = | 1.40 | 0.97 |
| PHEN | PF3D7_1122900 | = | 1.28 | 0.96 |
| PHEN | PF3D7_1141900 | = | 1.86 | 0.97 |
| PHEN | PF3D7_1475600 | = | 0.75 | 0.95 |
| PHEN | PF3D7_0211100 | = | 0.84 | 0.98 |
| PHEN | PF3D7_0203000 | = | 0.43 | 0.91 |
| PHEN | PF3D7_0404600 | = | 1.81 | 0.98 |
| PHEN | PF3D7_0416500 | = | 1.31 | 0.99 |
| PHEN | PF3D7_1018400 | = | 1.91 | 0.98 |
| PHEN | PF3D7_0511500 | = | 0.02 | 0.77 |
| PHEN | PF3D7_1360200 | = | 2.00 | 0.98 |
| PHEN | PF3D7_0611800 | = | 2.53 | 0.95 |
| PHEN | PF3D7_0619900 | = | 0.92 | 0.98 |
| PHEN | PF3D7_0521900 | = | 2.12 | 0.97 |
| PHEN | PF3D7_1219300 | = | 2.08 | 0.99 |
| PHEN | PF3D7_1133700 | = | 2.81 | 0.91 |
| PHEN | PF3D7_0808700 | = | 0.77 | 0.95 |
| PHEN | PF3D7_1136000 | = | 1.17 | 0.96 |
| PHEN | PF3D7_0931000 | = | 0.81 | 1.00 |
| PHEN | PF3D7_0830900 | = | 0.69 | 0.98 |
| PHEN | PF3D7_1231800 | = | 1.19 | 0.98 |
| PHEN | PF3D7_1035800 | = | 1.19 | 0.97 |

|      |               |   |      |      |
|------|---------------|---|------|------|
| PHEN | PF3D7_1444100 | = | 1.17 | 0.99 |
| PHEN | PF3D7_1138900 | = | 1.24 | 0.99 |
| PHEN | PF3D7_1441800 | = | 1.41 | 0.96 |
| PHEN | PF3D7_1345800 | = | 1.35 | 0.99 |
| PHEN | PF3D7_1432400 | = | 1.78 | 1.00 |
| PHEN | PF3D7_0819800 | = | 1.10 | 1.00 |
| PHEN | PF3D7_1207800 | = | 1.02 | 0.94 |
| PHEN | PF3D7_1143500 | = | 0.99 | 0.94 |
| PHEN | PF3D7_1001600 | = | 1.20 | 0.95 |
| PHEN | PF3D7_1019400 | = | 1.70 | 0.98 |
| PHEN | PF3D7_1311900 | = | 0.93 | 0.96 |
| PHEN | PF3D7_1035700 | = | 1.06 | 0.95 |
| PHEN | PF3D7_1103100 | = | 1.29 | 1.00 |
| PHEN | PF3D7_0812500 | = | 0.69 | 0.97 |
| PHEN | PF3D7_1216100 | = | 0.39 | 1.00 |
| PHEN | PF3D7_0206100 | = | 1.39 | 0.97 |
| PHEN | PF3D7_1352500 | = | 0.84 | 1.00 |
| PHEN | PF3D7_1226900 | = | 1.44 | 0.99 |
| PHEN | PF3D7_1368800 | = | 0.20 | 0.96 |
| PHEN | PF3D7_1432400 | = | 1.45 | 0.97 |
| PHEN | PF3D7_1343900 | = | 0.67 | 0.98 |
| PHEN | PF3D7_1328800 | = | 1.01 | 0.99 |
| PHEN | PF3D7_1330500 | = | 1.46 | 0.98 |
| PHEN | PF3D7_1343000 | = | 3.31 | 0.99 |
| PHEN | PF3D7_1302000 | = | 3.00 | 0.99 |
| PHEN | PF3D7_1107900 | = | 1.12 | 0.96 |
| PHEN | PF3D7_0606000 | = | 3.12 | 0.98 |
| PHEN | PF3D7_0614500 | = | 1.68 | 0.98 |
| PHEN | PF3D7_0203700 | = | 0.83 | 0.89 |
| PHEN | PF3D7_0601700 | = | 1.72 | 0.99 |
| PHEN | PF3D7_1001900 | = | 1.18 | 0.92 |
| PHEN | PF3D7_1409500 | = | 0.64 | 0.99 |
| PHEN | PF3D7_0916700 | = | 0.59 | 0.99 |
| PHEN | PF3D7_0402000 | = | 0.68 | 0.99 |
| PHEN | PF3D7_0102600 | = | 2.22 | 0.87 |
| PHEN | PF3D7_1433400 | = | 1.51 | 0.98 |
| PHEN | PF3D7_0322000 | = | 1.01 | 0.99 |
| PHEN | PF3D7_0623900 | = | 1.46 | 0.99 |
| PHEN | PF3D7_1013500 | = | 0.81 | 0.99 |

|     |               |   |      |      |
|-----|---------------|---|------|------|
| ROT | PF3D7_0811300 | = | 0.51 | 0.92 |
| ROT | PF3D7_1305500 | = | 0.69 | 0.96 |
| ROT | PF3D7_0615900 | = | 0.89 | 0.97 |
| ROT | PF3D7_1122900 | = | 0.04 | 0.97 |
| ROT | PF3D7_1141900 | = | 0.39 | 0.97 |
| ROT | PF3D7_1475600 | = | 0.65 | 0.98 |
| ROT | PF3D7_0211100 | = | 0.30 | 0.95 |
| ROT | PF3D7_0203000 | = | 0.15 | 0.78 |
| ROT | PF3D7_0404600 | = | 6.94 | 0.96 |
| ROT | PF3D7_0416500 | = | 3.70 | 0.94 |



|     |               |   |       |      |
|-----|---------------|---|-------|------|
| ROT | PF3D7_1018400 | = | 4.10  | 0.97 |
| ROT | PF3D7_0511500 | = | 1.28  | 0.94 |
| ROT | PF3D7_1360200 | = | 2.92  | 0.97 |
| ROT | PF3D7_0611800 | = | 25.53 | 0.97 |
| ROT | PF3D7_0619900 | = | 3.70  | 0.95 |
| ROT | PF3D7_0521900 | = | 12.80 | 0.96 |
| ROT | PF3D7_1219300 | = | 3.70  | 0.89 |
| ROT | PF3D7_1133700 | = | 13.75 | 0.89 |
| ROT | PF3D7_0808700 | = | 3.35  | 0.95 |
| ROT | PF3D7_1136000 | = | 0.62  | 0.92 |
| ROT | PF3D7_0931000 | = | 6.22  | 0.97 |
| ROT | PF3D7_0830900 | = | 3.85  | 0.99 |
| ROT | PF3D7_1231800 | = | 13.22 | 0.96 |
| ROT | PF3D7_1035800 | = | 24.88 | 0.97 |
| ROT | PF3D7_1444100 | = | 11.51 | 0.93 |
| ROT | PF3D7_1138900 | = | 10.99 | 0.93 |
| ROT | PF3D7_1441800 | = | 0.21  | 0.85 |
| ROT | PF3D7_1345800 | = | 2.32  | 0.98 |
| ROT | PF3D7_1432400 | = | 0.70  | 0.98 |
| ROT | PF3D7_0819800 | = | 0.69  | 0.95 |
| ROT | PF3D7_1207800 | = | 1.08  | 1.00 |
| ROT | PF3D7_1143500 | = | 0.08  | 0.92 |
| ROT | PF3D7_1001600 | = | 0.51  | 0.98 |
| ROT | PF3D7_1019400 | = | 2.64  | 0.96 |
| ROT | PF3D7_1311900 | = | 8.80  | 0.99 |
| ROT | PF3D7_1035700 | = | 2.50  | 0.94 |
| ROT | PF3D7_1103100 | = | 1.60  | 0.99 |
| ROT | PF3D7_0812500 | = | 9.80  | 0.96 |
| ROT | PF3D7_1216100 | = | 0.68  | 0.99 |
| ROT | PF3D7_0206100 | = | 1.35  | 0.98 |
| ROT | PF3D7_1352500 | = | 1.29  | 0.99 |
| ROT | PF3D7_1226900 | = | 0.44  | 0.98 |
| ROT | PF3D7_1368800 | = | 2.16  | 0.99 |
| ROT | PF3D7_1432400 | = | 1.49  | 0.99 |
| ROT | PF3D7_1343900 | = | 1.22  | 0.98 |
| ROT | PF3D7_1328800 | = | 1.15  | 0.99 |
| ROT | PF3D7_1138700 | = | 0.29  | 1.00 |
| ROT | PF3D7_1327100 | = | 0.17  | 0.99 |
| ROT | PF3D7_1136600 | = | 0.41  | 0.99 |
| ROT | PF3D7_0902200 | = | 0.06  | 0.99 |
| ROT | PF3D7_0727100 | = | 0.11  | 0.99 |
| ROT | PF3D7_0105500 | = | 0.05  | 0.97 |
| ROT | PF3D7_1126100 | = | 0.05  | 0.97 |
| ROT | PF3D7_1343700 | = | 0.05  | 0.98 |
| ROT | PF3D7_1330500 | = | 0.27  | 0.98 |
| ROT | PF3D7_1343000 | = | 0.11  | 0.98 |
| ROT | PF3D7_1302000 | = | 0.15  | 0.98 |
| ROT | PF3D7_1107900 | = | 0.02  | 0.97 |
| ROT | PF3D7_0606000 | = | 0.13  | 0.99 |
| ROT | PF3D7_0614500 | = | 0.36  | 0.99 |
| ROT | PF3D7_0203700 | = | 0.06  | 0.97 |
| ROT | PF3D7_0601700 | = | 0.10  | 0.99 |

|     |               |   |      |      |
|-----|---------------|---|------|------|
| ROT | PF3D7_1001900 | = | 1.96 | 0.86 |
| ROT | PF3D7_1409500 | = | 4.58 | 0.95 |
| ROT | PF3D7_0916700 | = | 1.27 | 0.97 |
| ROT | PF3D7_0402000 | = | 3.27 | 0.97 |
| ROT | PF3D7_0102600 | = | 0.69 | 0.96 |
| ROT | PF3D7_1433400 | = | 0.96 | 0.95 |
| ROT | PF3D7_0322000 | = | 6.76 | 0.98 |
| ROT | PF3D7_0623900 | = | 2.54 | 0.97 |
| ROT | PF3D7_1013500 | = | 1.33 | 0.96 |

|      |               |   |      |      |
|------|---------------|---|------|------|
| TTFA | PF3D7_0811300 | = | 0.79 | 0.99 |
| TTFA | PF3D7_1305500 | = | 0.78 | 0.98 |
| TTFA | PF3D7_0615900 | = | 0.64 | 0.92 |
| TTFA | PF3D7_1122900 | = | 0.56 | 0.95 |
| TTFA | PF3D7_1141900 | = | 0.58 | 0.92 |
| TTFA | PF3D7_1475600 | = | 0.64 | 0.95 |
| TTFA | PF3D7_0211100 | = | 0.32 | 0.99 |
| TTFA | PF3D7_0203000 | = | 0.35 | 0.98 |
| TTFA | PF3D7_0404600 | = | 1.10 | 0.92 |
| TTFA | PF3D7_0416500 | = | 0.30 | 0.93 |
| TTFA | PF3D7_1018400 | = | 1.50 | 0.95 |
| TTFA | PF3D7_0511500 | = | 0.00 | 0.72 |
| TTFA | PF3D7_1360200 | = | 0.66 | 0.99 |
| TTFA | PF3D7_0611800 | = | 0.11 | 0.94 |
| TTFA | PF3D7_0619900 | = | 0.49 | 0.98 |
| TTFA | PF3D7_0521900 | = | 2.61 | 0.98 |
| TTFA | PF3D7_1219300 | = | 1.93 | 1.00 |
| TTFA | PF3D7_1133700 | = | 1.14 | 1.00 |
| TTFA | PF3D7_0808700 | = | 2.09 | 0.97 |
| TTFA | PF3D7_1136000 | = | 1.53 | 0.98 |
| TTFA | PF3D7_0931000 | = | 2.81 | 0.99 |
| TTFA | PF3D7_0830900 | = | 0.92 | 0.94 |
| TTFA | PF3D7_1231800 | = | 3.09 | 0.96 |
| TTFA | PF3D7_1035800 | = | 1.97 | 0.95 |
| TTFA | PF3D7_1444100 | = | 4.26 | 0.98 |
| TTFA | PF3D7_1138900 | = | 1.97 | 0.98 |
| TTFA | PF3D7_1441800 | = | 0.73 | 0.97 |
| TTFA | PF3D7_1345800 | = | 0.69 | 0.99 |
| TTFA | PF3D7_1432400 | = | 2.09 | 0.99 |
| TTFA | PF3D7_0819800 | = | 0.82 | 0.98 |
| TTFA | PF3D7_1207800 | = | 0.09 | 0.87 |
| TTFA | PF3D7_1143500 | = | 0.64 | 0.93 |
| TTFA | PF3D7_1001600 | = | 0.40 | 0.97 |
| TTFA | PF3D7_1019400 | = | 1.37 | 0.98 |
| TTFA | PF3D7_1311900 | = | 0.88 | 0.98 |
| TTFA | PF3D7_1035700 | = | 0.63 | 0.98 |
| TTFA | PF3D7_1103100 | = | 1.43 | 1.00 |
| TTFA | PF3D7_0812500 | = | 0.49 | 0.99 |
| TTFA | PF3D7_1216100 | = | 0.41 | 0.99 |
| TTFA | PF3D7_0206100 | = | 0.66 | 0.99 |

|      |               |   |      |      |
|------|---------------|---|------|------|
| TTFA | PF3D7_1352500 | = | 0.54 | 0.99 |
| TTFA | PF3D7_1226900 | = | 0.91 | 0.97 |
| TTFA | PF3D7_1368800 | = | 0.36 | 0.98 |
| TTFA | PF3D7_1432400 | = | 6.76 | 0.99 |
| TTFA | PF3D7_1343900 | = | 0.84 | 0.98 |
| TTFA | PF3D7_1328800 | = | 0.57 | 0.91 |
| TTFA | PF3D7_1138700 | = | 0.23 | 0.95 |
| TTFA | PF3D7_1327100 | = | 0.18 | 0.91 |
| TTFA | PF3D7_1136600 | = | 0.10 | 0.91 |
| TTFA | PF3D7_0902200 | = | 0.25 | 0.92 |
| TTFA | PF3D7_0727100 | = | 0.10 | 0.89 |
| TTFA | PF3D7_0105500 | = | 0.21 | 0.93 |
| TTFA | PF3D7_1126100 | = | 0.11 | 0.92 |
| TTFA | PF3D7_1343700 | = | 0.05 | 0.89 |
| TTFA | PF3D7_1330500 | = | 1.19 | 0.98 |
| TTFA | PF3D7_1343000 | = | 1.83 | 0.98 |
| TTFA | PF3D7_1302000 | = | 2.67 | 0.99 |
| TTFA | PF3D7_1107900 | = | 1.10 | 0.98 |
| TTFA | PF3D7_0606000 | = | 1.71 | 0.97 |
| TTFA | PF3D7_0614500 | = | 0.98 | 0.96 |
| TTFA | PF3D7_0203700 | = | 1.08 | 0.98 |
| TTFA | PF3D7_0601700 | = | 0.90 | 0.99 |
| TTFA | PF3D7_1001900 | = | 0.51 | 0.93 |
| TTFA | PF3D7_1409500 | = | 0.50 | 0.99 |
| TTFA | PF3D7_0916700 | = | 0.34 | 0.99 |
| TTFA | PF3D7_0402000 | = | 0.89 | 1.00 |
| TTFA | PF3D7_0102600 | = | 0.84 | 0.97 |
| TTFA | PF3D7_1433400 | = | 0.80 | 0.99 |
| TTFA | PF3D7_0322000 | = | 0.70 | 0.96 |
| TTFA | PF3D7_0623900 | = | 0.68 | 0.98 |
| TTFA | PF3D7_1013500 | = | 0.51 | 0.99 |

|      |               |   |      |      |
|------|---------------|---|------|------|
| EHNA | PF3D7_0811300 | = | 0.35 | 0.98 |
| EHNA | PF3D7_1305500 | = | 0.33 | 0.98 |
| EHNA | PF3D7_0615900 | = | 0.23 | 0.91 |
| EHNA | PF3D7_1122900 | = | 0.12 | 0.90 |
| EHNA | PF3D7_1141900 | = | 0.66 | 0.93 |
| EHNA | PF3D7_1475600 | = | 0.06 | 0.93 |
| EHNA | PF3D7_0211100 | = | 0.12 | 0.93 |
| EHNA | PF3D7_0203000 | = | 0.21 | 0.95 |
| EHNA | PF3D7_0404600 | = | 0.95 | 0.99 |
| EHNA | PF3D7_0416500 | = | 0.18 | 0.97 |
| EHNA | PF3D7_1018400 | = | 1.22 | 0.97 |
| EHNA | PF3D7_0511500 | = | 0.00 | 0.65 |
| EHNA | PF3D7_1360200 | = | 0.47 | 0.97 |
| EHNA | PF3D7_0611800 | = | 0.31 | 0.98 |
| EHNA | PF3D7_0619900 | = | 1.07 | 0.97 |
| EHNA | PF3D7_0521900 | = | 0.98 | 0.96 |
| EHNA | PF3D7_1219300 | = | 1.32 | 0.99 |
| EHNA | PF3D7_1133700 | = | 0.27 | 0.93 |

|      |               |   |      |      |
|------|---------------|---|------|------|
| EHNA | PF3D7_0808700 | = | 0.20 | 0.98 |
| EHNA | PF3D7_1136000 | = | 0.32 | 0.97 |
| EHNA | PF3D7_0931000 | = | 0.76 | 0.99 |
| EHNA | PF3D7_0830900 | = | 0.11 | 0.94 |
| EHNA | PF3D7_1231800 | = | 1.22 | 0.93 |
| EHNA | PF3D7_1035800 | = | 0.83 | 0.96 |
| EHNA | PF3D7_1444100 | = | 1.38 | 0.97 |
| EHNA | PF3D7_0203600 | = | 0.03 | 0.90 |
| EHNA | PF3D7_1138900 | = | 0.40 | 0.95 |
| EHNA | PF3D7_1441800 | = | 0.48 | 0.97 |
| EHNA | PF3D7_1345800 | = | 0.80 | 1.00 |
| EHNA | PF3D7_1432400 | = | 1.87 | 0.99 |
| EHNA | PF3D7_0819800 | = | 0.45 | 1.00 |
| EHNA | PF3D7_1207800 | = | 0.07 | 0.92 |
| EHNA | PF3D7_1143500 | = | 0.76 | 0.93 |
| EHNA | PF3D7_1001600 | = | 0.12 | 0.93 |
| EHNA | PF3D7_1019400 | = | 0.52 | 0.95 |
| EHNA | PF3D7_1311900 | = | 0.35 | 0.93 |
| EHNA | PF3D7_1035700 | = | 0.46 | 0.99 |
| EHNA | PF3D7_1103100 | = | 3.10 | 0.99 |
| EHNA | PF3D7_0812500 | = | 0.42 | 0.96 |
| EHNA | PF3D7_1216100 | = | 0.82 | 0.97 |
| EHNA | PF3D7_0206100 | = | 0.31 | 0.94 |
| EHNA | PF3D7_1352500 | = | 0.45 | 0.98 |
| EHNA | PF3D7_1226900 | = | 0.65 | 0.99 |
| EHNA | PF3D7_1368800 | = | 0.17 | 0.98 |
| EHNA | PF3D7_1432400 | = | 1.31 | 0.98 |
| EHNA | PF3D7_1343900 | = | 0.97 | 0.98 |
| EHNA | PF3D7_1328800 | = | 0.37 | 0.97 |
| EHNA | PF3D7_1138700 | = | 0.81 | 0.98 |
| EHNA | PF3D7_1327100 | = | 0.72 | 0.99 |
| EHNA | PF3D7_1136600 | = | 0.34 | 0.96 |
| EHNA | PF3D7_0902200 | = | 0.18 | 0.97 |
| EHNA | PF3D7_0727100 | = | 0.28 | 0.98 |
| EHNA | PF3D7_0105500 | = | 0.39 | 0.98 |
| EHNA | PF3D7_1126100 | = | 0.05 | 0.94 |
| EHNA | PF3D7_1343700 | = | 0.21 | 0.96 |
| EHNA | PF3D7_1330500 | = | 1.61 | 0.99 |
| EHNA | PF3D7_1343000 | = | 3.93 | 0.98 |
| EHNA | PF3D7_1302000 | = | 2.62 | 0.98 |
| EHNA | PF3D7_0203700 | = | 1.13 | 0.99 |
| EHNA | PF3D7_1107900 | = | 1.41 | 0.97 |
| EHNA | PF3D7_0606000 | = | 2.61 | 0.97 |
| EHNA | PF3D7_0614500 | = | 1.51 | 0.98 |
| EHNA | PF3D7_0203700 | = | 0.44 | 0.98 |
| EHNA | PF3D7_0601700 | = | 1.28 | 0.99 |
|      |               |   |      |      |
| ALLO | PF3D7_0811300 | = | 0.01 | 0.61 |
| ALLO | PF3D7_1305500 | = | 1.14 | 0.96 |
| ALLO | PF3D7_0615900 | = | 1.16 | 0.92 |

|      |               |   |      |      |
|------|---------------|---|------|------|
| ALLO | PF3D7_1122900 | = | 0.70 | 0.99 |
| ALLO | PF3D7_1141900 | = | 0.98 | 0.97 |
| ALLO | PF3D7_1475600 | = | 0.48 | 0.95 |
| ALLO | PF3D7_0211100 | = | 0.26 | 0.96 |
| ALLO | PF3D7_0203000 | = | 0.53 | 0.98 |
| ALLO | PF3D7_0404600 | = | 1.08 | 1.00 |
| ALLO | PF3D7_0416500 | = | 0.41 | 0.99 |
| ALLO | PF3D7_1018400 | = | 1.51 | 1.00 |
| ALLO | PF3D7_0511500 | = | 0.00 | 0.74 |
| ALLO | PF3D7_1360200 | = | 1.14 | 0.99 |
| ALLO | PF3D7_0611800 | = | 1.12 | 0.98 |
| ALLO | PF3D7_0619900 | = | 1.36 | 0.99 |
| ALLO | PF3D7_0521900 | = | 1.46 | 1.00 |
| ALLO | PF3D7_1219300 | = | 1.45 | 1.00 |
| ALLO | PF3D7_1133700 | = | 1.61 | 1.00 |
| ALLO | PF3D7_0808700 | = | 1.60 | 0.96 |
| ALLO | PF3D7_1136000 | = | 1.01 | 0.99 |
| ALLO | PF3D7_0931000 | = | 1.40 | 1.00 |
| ALLO | PF3D7_0830900 | = | 0.63 | 0.98 |
| ALLO | PF3D7_1231800 | = | 1.61 | 0.97 |
| ALLO | PF3D7_1035800 | = | 1.52 | 1.00 |
| ALLO | PF3D7_1444100 | = | 1.80 | 1.00 |
| ALLO | PF3D7_1138900 | = | 1.18 | 0.99 |
| ALLO | PF3D7_1441800 | = | 0.46 | 0.95 |
| ALLO | PF3D7_1345800 | = | 0.99 | 1.00 |
| ALLO | PF3D7_1432400 | = | 1.18 | 1.00 |
| ALLO | PF3D7_0819800 | = | 0.55 | 0.97 |
| ALLO | PF3D7_1207800 | = | 0.34 | 0.97 |
| ALLO | PF3D7_1143500 | = | 0.59 | 0.95 |
| ALLO | PF3D7_1001600 | = | 0.34 | 0.95 |
| ALLO | PF3D7_1019400 | = | 0.54 | 0.95 |
| ALLO | PF3D7_1311900 | = | 0.14 | 0.95 |
| ALLO | PF3D7_1035700 | = | 0.56 | 0.99 |
| ALLO | PF3D7_1103100 | = | 1.42 | 0.99 |
| ALLO | PF3D7_0812500 | = | 1.06 | 1.00 |
| ALLO | PF3D7_1216100 | = | 0.84 | 1.00 |
| ALLO | PF3D7_0206100 | = | 0.80 | 1.00 |
| ALLO | PF3D7_1352500 | = | 0.59 | 0.99 |
| ALLO | PF3D7_1226900 | = | 0.90 | 0.96 |
| ALLO | PF3D7_1368800 | = | 0.18 | 0.99 |
| ALLO | PF3D7_1432400 | = | 1.84 | 1.00 |
| ALLO | PF3D7_1343900 | = | 0.63 | 0.97 |
| ALLO | PF3D7_1328800 | = | 3.76 | 0.89 |
| ALLO | PF3D7_1138700 | = | 0.78 | 1.00 |
| ALLO | PF3D7_1327100 | = | 0.60 | 0.98 |
| ALLO | PF3D7_1136600 | = | 0.69 | 1.00 |
| ALLO | PF3D7_0902200 | = | 0.40 | 0.97 |
| ALLO | PF3D7_0727100 | = | 0.39 | 0.99 |
| ALLO | PF3D7_0105500 | = | 0.39 | 0.98 |
| ALLO | PF3D7_1126100 | = | 0.23 | 0.99 |
| ALLO | PF3D7_1343700 | = | 0.16 | 0.99 |
| ALLO | PF3D7_1330500 | = | 0.91 | 0.98 |

|      |               |   |      |      |
|------|---------------|---|------|------|
| ALLO | PF3D7_1343000 | = | 1.57 | 1.00 |
| ALLO | PF3D7_1302000 | = | 1.26 | 0.99 |
| ALLO | PF3D7_1107900 | = | 1.78 | 0.96 |
| ALLO | PF3D7_0606000 | = | 1.22 | 0.98 |
| ALLO | PF3D7_0614500 | = | 0.58 | 0.99 |
| ALLO | PF3D7_0203700 | = | 1.60 | 1.00 |
| ALLO | PF3D7_0601700 | = | 0.83 | 1.00 |
| ALLO | PF3D7_1001900 | = | 1.21 | 0.91 |
| ALLO | PF3D7_1409500 | = | 1.69 | 0.98 |
| ALLO | PF3D7_0916700 | = | 1.08 | 0.97 |
| ALLO | PF3D7_0402000 | = | 0.37 | 0.95 |
| ALLO | PF3D7_0102600 | = | 1.33 | 1.00 |
| ALLO | PF3D7_1433400 | = | 2.15 | 0.95 |
| ALLO | PF3D7_0322000 | = | 0.43 | 0.90 |
| ALLO | PF3D7_0623900 | = | 1.20 | 0.99 |
| ALLO | PF3D7_1013500 | = | 0.69 | 1.00 |

|     |               |   |        |      |
|-----|---------------|---|--------|------|
| PYR | PF3D7_0811300 | = | 100.31 | 0.96 |
| PYR | PF3D7_1305500 | = | 272.51 | 0.97 |
| PYR | PF3D7_0615900 | = | 392.63 | 0.99 |
| PYR | PF3D7_1122900 | = | 263.54 | 0.97 |
| PYR | PF3D7_1141900 | = | 289.38 | 0.99 |
| PYR | PF3D7_1475600 | = | 201.92 | 0.99 |
| PYR | PF3D7_0211100 | = | 468.35 | 1.00 |
| PYR | PF3D7_0203000 | = | 59.08  | 0.82 |
| PYR | PF3D7_0404600 | = | 78.28  | 0.95 |
| PYR | PF3D7_0416500 | = | 183.06 | 0.87 |
| PYR | PF3D7_1018400 | = | 157.30 | 0.92 |
| PYR | PF3D7_0511500 | = | 201.12 | 0.99 |
| PYR | PF3D7_1360200 | = | 132.86 | 0.96 |
| PYR | PF3D7_0611800 | = | 1.14   | 0.98 |
| PYR | PF3D7_0619900 | = | 143.53 | 0.98 |
| PYR | PF3D7_0521900 | = | 1.85   | 0.99 |
| PYR | PF3D7_1219300 | = | 1.29   | 0.97 |
| PYR | PF3D7_1133700 | = | 48.02  | 0.97 |
| PYR | PF3D7_0808700 | = | 0.65   | 0.93 |
| PYR | PF3D7_1136000 | = | 105.98 | 0.99 |
| PYR | PF3D7_0931000 | = | 175.60 | 0.95 |
| PYR | PF3D7_0830900 | = | 150.32 | 0.92 |
| PYR | PF3D7_1231800 | = | 159.32 | 0.97 |
| PYR | PF3D7_1035800 | = | 129.45 | 0.98 |
| PYR | PF3D7_1444100 | = | 153.17 | 0.96 |
| PYR | PF3D7_1138900 | = | 64.16  | 0.89 |
| PYR | PF3D7_1441800 | = | 77.18  | 0.87 |
| PYR | PF3D7_1345800 | = | 152.20 | 1.00 |
| PYR | PF3D7_1432400 | = | 120.75 | 0.97 |
| PYR | PF3D7_0819800 | = | 95.72  | 0.96 |
| PYR | PF3D7_1207800 | = | 1.41   | 0.96 |
| PYR | PF3D7_1143500 | = | 105.64 | 0.95 |
| PYR | PF3D7_1001600 | = | 97.59  | 0.99 |

|     |               |   |         |      |
|-----|---------------|---|---------|------|
| PYR | PF3D7_1019400 | = | 102.46  | 0.97 |
| PYR | PF3D7_1311900 | = | 88.83   | 0.94 |
| PYR | PF3D7_1035700 | = | 58.09   | 0.93 |
| PYR | PF3D7_1103100 | = | 80.33   | 0.92 |
| PYR | PF3D7_0812500 | = | 94.60   | 0.92 |
| PYR | PF3D7_1216100 | = | 86.00   | 0.98 |
| PYR | PF3D7_0206100 | = | 174.13  | 1.00 |
| PYR | PF3D7_1352500 | = | 0.84    | 0.99 |
| PYR | PF3D7_1226900 | = | 69.46   | 0.99 |
| PYR | PF3D7_1368800 | = | 165.63  | 0.99 |
| PYR | PF3D7_1432400 | = | 135.48  | 0.99 |
| PYR | PF3D7_1343900 | = | 94.89   | 1.00 |
| PYR | PF3D7_1328800 | = | 101.21  | 0.98 |
| PYR | PF3D7_1138700 | = | 644.93  | 1.00 |
| PYR | PF3D7_1327100 | = | 294.09  | 0.99 |
| PYR | PF3D7_1136600 | = | 453.49  | 0.99 |
| PYR | PF3D7_0902200 | = | 437.83  | 0.98 |
| PYR | PF3D7_0727100 | = | 415.68  | 0.99 |
| PYR | PF3D7_0105500 | = | 326.95  | 0.98 |
| PYR | PF3D7_1126100 | = | 332.55  | 0.97 |
| PYR | PF3D7_1343700 | = | 242.07  | 1.00 |
| PYR | PF3D7_1330500 | = | 1191.52 | 1.00 |
| PYR | PF3D7_1343000 | = | 883.42  | 0.97 |
| PYR | PF3D7_1302000 | = | 1.01    | 0.99 |
| PYR | PF3D7_1107900 | = | 388.92  | 0.98 |
| PYR | PF3D7_0606000 | = | 1147.52 | 0.99 |
| PYR | PF3D7_0614500 | = | 1049.70 | 0.99 |
| PYR | PF3D7_0203700 | = | 1092.31 | 1.00 |
| PYR | PF3D7_0601700 | = | 841.72  | 0.99 |
| PYR | PF3D7_1001900 | = | 936.48  | 0.98 |
| PYR | PF3D7_1409500 | = | 583.59  | 0.98 |
| PYR | PF3D7_0916700 | = | 479.53  | 1.00 |
| PYR | PF3D7_0402000 | = | 0.66    | 0.98 |
| PYR | PF3D7_0102600 | = | 5.00    | 0.96 |
| PYR | PF3D7_1433400 | = | 4.01    | 0.96 |
| PYR | PF3D7_0322000 | = | 372.31  | 0.99 |
| PYR | PF3D7_0623900 | = | 502.36  | 0.99 |
| PYR | PF3D7_1013500 | = | 828.49  | 1.00 |

|    |               |   |         |      |
|----|---------------|---|---------|------|
| CG | PF3D7_0811300 | = | 2310.00 | 0.97 |
| CG | PF3D7_1305500 | = | 3120.00 | 0.99 |
| CG | PF3D7_0615900 | = | 3970.00 | 0.98 |
| CG | PF3D7_1122900 | = | 2600.00 | 0.95 |
| CG | PF3D7_1141900 | = | 4720.00 | 0.95 |
| CG | PF3D7_1475600 | = | 680.00  | 0.97 |
| CG | PF3D7_0211100 | = | 0.34    | 0.92 |
| CG | PF3D7_0203000 | = | 3710.00 | 0.99 |
| CG | PF3D7_0404600 | = | 4320.00 | 1.00 |
| CG | PF3D7_0416500 | = | 630.82  | 0.98 |
| CG | PF3D7_1018400 | = | 810.37  | 0.96 |

|    |               |   |          |      |
|----|---------------|---|----------|------|
| CG | PF3D7_0511500 | = | 1147.62  | 0.97 |
| CG | PF3D7_1360200 | = | 778.89   | 0.97 |
| CG | PF3D7_0611800 | = | 780.32   | 0.98 |
| CG | PF3D7_0619900 | = | 390.04   | 0.97 |
| CG | PF3D7_0521900 | = | 478.36   | 0.94 |
| CG | PF3D7_1219300 | = | 1.87     | 0.97 |
| CG | PF3D7_1133700 | = | 690.78   | 0.98 |
| CG | PF3D7_0808700 | = | 2.22     | 0.96 |
| CG | PF3D7_1136000 | = | 733.71   | 0.97 |
| CG | PF3D7_0931000 | = | 468.74   | 0.96 |
| CG | PF3D7_0830900 | = | 468.74   | 0.92 |
| CG | PF3D7_1231800 | = | 792.52   | 0.94 |
| CG | PF3D7_1035800 | = | 754.98   | 0.96 |
| CG | PF3D7_1444100 | = | 833.68   | 0.95 |
| CG | PF3D7_0203600 | = | 1.40     | 0.98 |
| CG | PF3D7_1138900 | = | 77.81    | 0.97 |
| CG | PF3D7_1441800 | = | 400.58   | 0.82 |
| CG | PF3D7_1345800 | = | 420.65   | 1.00 |
| CG | PF3D7_1432400 | = | 616.08   | 1.00 |
| CG | PF3D7_0819800 | = | 565.96   | 1.00 |
| CG | PF3D7_1207800 | = | 30.50    | 0.98 |
| CG | PF3D7_1143500 | = | 402.95   | 0.96 |
| CG | PF3D7_1001600 | = | 269.30   | 0.99 |
| CG | PF3D7_1019400 | = | 274.44   | 0.99 |
| CG | PF3D7_1311900 | = | 274.44   | 0.99 |
| CG | PF3D7_1035700 | = | 623.52   | 0.97 |
| CG | PF3D7_1103100 | = | 661.37   | 1.00 |
| CG | PF3D7_0812500 | = | 602.96   | 0.97 |
| CG | PF3D7_1216100 | = | 1293.05  | 1.00 |
| CG | PF3D7_0206100 | = | 786.55   | 0.96 |
| CG | PF3D7_1352500 | = | 0.81     | 0.88 |
| CG | PF3D7_1226900 | = | 1140.01  | 0.96 |
| CG | PF3D7_1368800 | = | 584.72   | 0.98 |
| CG | PF3D7_1432400 | = | 1140.68  | 0.99 |
| CG | PF3D7_1343900 | = | 784.93   | 0.95 |
| CG | PF3D7_1328800 | = | 460.72   | 0.97 |
| CG | PF3D7_1138700 | = | 14040.00 | 0.98 |
| CG | PF3D7_1327100 | = | 9984.50  | 0.99 |
| CG | PF3D7_1136600 | = | 15021.25 | 0.99 |
| CG | PF3D7_0902200 | = | 13466.00 | 0.99 |
| CG | PF3D7_0727100 | = | 2969.25  | 0.97 |
| CG | PF3D7_0105500 | = | 18275.25 | 1.00 |
| CG | PF3D7_1126100 | = | 7807.50  | 0.98 |
| CG | PF3D7_1343700 | = | 9331.50  | 0.99 |
| CG | PF3D7_1330500 | = | 4552.30  | 1.00 |
| CG | PF3D7_1343000 | = | 4467.18  | 0.99 |
| CG | PF3D7_1302000 | = | 1.83     | 0.98 |
| CG | PF3D7_0203700 | = | 1924.73  | 0.99 |
| CG | PF3D7_1107900 | = | 3938.05  | 0.98 |
| CG | PF3D7_0606000 | = | 5120.33  | 1.00 |
| CG | PF3D7_0614500 | = | 2717.95  | 0.99 |
| CG | PF3D7_0203700 | = | 3374.58  | 0.99 |



|     |               |   |         |      |
|-----|---------------|---|---------|------|
| CG  | PF3D7_0601700 | = | 2697.43 | 0.99 |
| SDZ | PF3D7_0811300 | = | 0.24    | 0.92 |
| SDZ | PF3D7_1305500 | = | 0.55    | 0.97 |
| SDZ | PF3D7_0615900 | = | 0.87    | 1.00 |
| SDZ | PF3D7_1122900 | = | 0.40    | 0.96 |
| SDZ | PF3D7_1141900 | = | 0.98    | 0.97 |
| SDZ | PF3D7_1475600 | = | 0.76    | 1.00 |
| SDZ | PF3D7_0211100 | = | 0.15    | 0.87 |
| SDZ | PF3D7_0203000 | = | 0.73    | 0.91 |
| SDZ | PF3D7_0404600 | = | 0.32    | 0.94 |
| SDZ | PF3D7_0416500 | = | 2.54    | 0.96 |
| SDZ | PF3D7_1018400 | = | 1.35    | 0.89 |
| SDZ | PF3D7_0511500 | = | 2.55    | 0.96 |
| SDZ | PF3D7_1360200 | = | 0.87    | 0.98 |
| SDZ | PF3D7_0611800 | = | 2.29    | 0.98 |
| SDZ | PF3D7_0619900 | = | 1.07    | 0.97 |
| SDZ | PF3D7_0521900 | = | 2.63    | 0.98 |
| SDZ | PF3D7_1219300 | = | 2.07    | 0.95 |
| SDZ | PF3D7_1133700 | = | 1.00    | 0.99 |
| SDZ | PF3D7_0808700 | = | 1.00    | 0.99 |
| SDZ | PF3D7_1432400 | = | 0.77    | 0.96 |
| SDZ | PF3D7_0819800 | = | 0.47    | 0.99 |
| SDZ | PF3D7_1207800 | = | 0.69    | 0.98 |
| SDZ | PF3D7_1143500 | = | 0.68    | 0.99 |
| SDZ | PF3D7_1001600 | = | 0.66    | 0.97 |
| SDZ | PF3D7_1019400 | = | 1.96    | 0.99 |
| SDZ | PF3D7_1311900 | = | 0.49    | 1.00 |
| SDZ | PF3D7_1035700 | = | 0.46    | 0.99 |
| SDZ | PF3D7_1103100 | = | 0.05    | 0.99 |
| SDZ | PF3D7_0812500 | = | 0.67    | 0.83 |
| SDZ | PF3D7_1216100 | = | 0.66    | 1.00 |
| SDZ | PF3D7_0206100 | = | 0.80    | 1.00 |
| SDZ | PF3D7_1352500 | = | 0.80    | 1.00 |
| SDZ | PF3D7_1226900 | = | 2.51    | 0.99 |
| SDZ | PF3D7_1368800 | = | 0.93    | 1.00 |
| SDZ | PF3D7_1432400 | = | 0.69    | 1.00 |
| SDZ | PF3D7_1343900 | = | 0.58    | 0.99 |
| SDZ | PF3D7_1328800 | = | 0.95    | 1.00 |
| SDZ | PF3D7_1138700 | = | 0.57    | 0.98 |
| SDZ | PF3D7_1327100 | = | 0.23    | 0.98 |
| SDZ | PF3D7_1136600 | = | 0.55    | 0.99 |
| SDZ | PF3D7_0902200 | = | 0.67    | 1.00 |
| SDZ | PF3D7_0727100 | = | 0.66    | 0.99 |
| SDZ | PF3D7_0105500 | = | 0.37    | 0.99 |
| SDZ | PF3D7_1126100 | = | 0.41    | 0.97 |
| SDZ | PF3D7_1343700 | = | 0.20    | 0.99 |
| SDZ | PF3D7_1330500 | = | 1.54    | 0.99 |
| SDZ | PF3D7_1343000 | = | 0.71    | 0.97 |
| SDZ | PF3D7_1302000 | = | 1.88    | 0.99 |

|     |               |   |         |      |
|-----|---------------|---|---------|------|
| SDZ | PF3D7_0203700 | = | 2.44    | 1.00 |
| SDZ | PF3D7_1107900 | = | 0.58    | 0.99 |
| SDZ | PF3D7_0606000 | = | 1.58    | 0.99 |
| SDZ | PF3D7_0614500 | = | 1.46    | 0.98 |
| SDZ | PF3D7_0203700 | = | 1.35    | 0.99 |
| SDZ | PF3D7_0601700 | = | 1.33    | 0.99 |
| SDZ | PF3D7_0702300 | = | 1.71    | 0.98 |
| SDZ | PF3D7_1001900 | = | 0.55    | 0.96 |
| SDZ | PF3D7_1409500 | = | 0.06    | 0.99 |
| SDZ | PF3D7_0916700 | = | 0.81    | 1.00 |
| SDZ | PF3D7_0402000 | = | 0.90    | 0.99 |
| SDZ | PF3D7_0102600 | = | 0.86    | 0.99 |
| SDZ | PF3D7_1433400 | = | 0.92    | 0.99 |
| SDZ | PF3D7_0322000 | = | 0.85    | 1.00 |
| SDZ | PF3D7_0623900 | = | 1.26    | 0.99 |
| SDZ | PF3D7_0103300 | > | 3330 uM |      |
| SDZ | PF3D7_1013500 | = | 10.07   | 0.96 |

|    |               |   |      |      |
|----|---------------|---|------|------|
| IB | PF3D7_0811300 | = | 6.97 | 0.98 |
| IB | PF3D7_1305500 | = | 1.12 | 0.99 |
| IB | PF3D7_0615900 | = | 0.15 | 0.79 |
| IB | PF3D7_1122900 | = | 4.17 | 0.98 |
| IB | PF3D7_1141900 | = | 0.65 | 0.92 |
| IB | PF3D7_1475600 | = | 1.30 | 0.96 |
| IB | PF3D7_0211100 | = | 0.41 | 0.84 |
| IB | PF3D7_0203000 | = | 0.73 | 0.86 |
| IB | PF3D7_0404600 | = | 1.00 | 0.99 |
| IB | PF3D7_0416500 | = | 0.34 | 0.99 |
| IB | PF3D7_1018400 | = | 0.41 | 0.98 |
| IB | PF3D7_0511500 | = | 1.51 | 0.98 |
| IB | PF3D7_1360200 | = | 0.38 | 0.99 |
| IB | PF3D7_0611800 | = | 0.43 | 0.98 |
| IB | PF3D7_0619900 | = | 0.91 | 0.99 |
| IB | PF3D7_0521900 | = | 0.46 | 0.86 |
| IB | PF3D7_1219300 | = | 0.49 | 0.98 |
| IB | PF3D7_1133700 | = | 1.24 | 0.99 |
| IB | PF3D7_0808700 | = | 3.63 | 0.96 |
| IB | PF3D7_1136000 | = | 2.47 | 0.98 |
| IB | PF3D7_0931000 | = | 1.71 | 1.00 |
| IB | PF3D7_0830900 | = | 0.93 | 0.99 |
| IB | PF3D7_1231800 | = | 1.67 | 0.97 |
| IB | PF3D7_1035800 | = | 7.02 | 0.94 |
| IB | PF3D7_1444100 | = | 1.87 | 0.90 |
| IB | PF3D7_1138900 | = | 0.86 | 0.84 |
| IB | PF3D7_1441800 | = | 0.59 | 0.84 |
| IB | PF3D7_1345800 | = | 0.72 | 0.91 |
| IB | PF3D7_1432400 | = | 0.88 | 1.00 |
| IB | PF3D7_0819800 | = | 0.74 | 1.00 |
| IB | PF3D7_1207800 | = | 1.08 | 0.99 |
| IB | PF3D7_1143500 | = | 0.75 | 0.99 |

|    |               |   |      |      |
|----|---------------|---|------|------|
| IB | PF3D7_1001600 | = | 0.47 | 0.99 |
| IB | PF3D7_1019400 | = | 0.67 | 0.99 |
| IB | PF3D7_1311900 | = | 5.86 | 0.89 |
| IB | PF3D7_1035700 | = | 0.76 | 0.93 |
| IB | PF3D7_1103100 | = | 0.89 | 1.00 |
| IB | PF3D7_0812500 | = | 1.00 | 0.98 |
| IB | PF3D7_1216100 | = | 4.68 | 1.00 |
| IB | PF3D7_0206100 | = | 0.81 | 0.99 |
| IB | PF3D7_1352500 | = | 0.67 | 1.00 |
| IB | PF3D7_1226900 | = | 1.71 | 0.99 |
| IB | PF3D7_1368800 | = | 0.98 | 1.00 |
| IB | PF3D7_1432400 | = | 2.99 | 0.99 |
| IB | PF3D7_1343900 | = | 0.17 | 0.89 |
| IB | PF3D7_1328800 | = | 0.26 | 0.88 |
| IB | PF3D7_1138700 | = | 0.22 | 0.98 |
| IB | PF3D7_1327100 | = | 0.45 | 0.94 |
| IB | PF3D7_1136600 | = | 0.33 | 1.00 |
| IB | PF3D7_0902200 | = | 0.33 | 0.98 |
| IB | PF3D7_0727100 | = | 0.23 | 1.00 |
| IB | PF3D7_0105500 | = | 0.37 | 0.90 |
| IB | PF3D7_1126100 | = | 0.22 | 0.96 |
| IB | PF3D7_1343700 | = | 0.21 | 0.99 |
| IB | PF3D7_1330500 | = | 1.40 | 0.92 |
| IB | PF3D7_1343000 | = | 2.83 | 0.99 |
| IB | PF3D7_1302000 | = | 2.75 | 0.95 |
| IB | PF3D7_1107900 | = | 1.78 | 0.98 |
| IB | PF3D7_0606000 | = | 1.57 | 0.94 |
| IB | PF3D7_0614500 | = | 1.20 | 0.91 |
| IB | PF3D7_0203700 | = | 1.07 | 0.93 |
| IB | PF3D7_0601700 | = | 1.44 | 0.87 |
| IB | PF3D7_1001900 | = | 1.68 | 0.97 |
| IB | PF3D7_1409500 | = | 1.65 | 0.99 |
| IB | PF3D7_0916700 | = | 1.25 | 0.89 |
| IB | PF3D7_0402000 | = | 1.18 | 0.94 |
| IB | PF3D7_0102600 | = | 0.79 | 0.97 |
| IB | PF3D7_1433400 | = | 1.76 | 0.94 |
| IB | PF3D7_0322000 | = | 1.33 | 0.99 |
| IB | PF3D7_0623900 | = | 1.02 | 0.99 |
| IB | PF3D7_1013500 | = | 0.64 | 0.97 |

|      |               |   |      |      |
|------|---------------|---|------|------|
| FADE | PF3D7_0811300 | = | 0.02 | 0.98 |
| FADE | PF3D7_1305500 | = | 0.63 | 0.99 |
| FADE | PF3D7_0615900 | = | 0.31 | 0.95 |
| FADE | PF3D7_1122900 | = | 0.41 | 0.88 |
| FADE | PF3D7_1141900 | = | 1.83 | 0.97 |
| FADE | PF3D7_1475600 | = | 0.26 | 0.95 |
| FADE | PF3D7_0211100 | = | 0.15 | 0.90 |
| FADE | PF3D7_0203000 | = | 0.23 | 0.92 |
| FADE | PF3D7_0404600 | = | 1.07 | 0.99 |
| FADE | PF3D7_0416500 | = | 0.76 | 0.93 |

|      |               |   |       |      |
|------|---------------|---|-------|------|
| FADE | PF3D7_1018400 | = | 2.85  | 0.98 |
| FADE | PF3D7_0511500 | = | 0.00  | 0.45 |
| FADE | PF3D7_1360200 | = | 2.79  | 0.94 |
| FADE | PF3D7_0611800 | = | 1.35  | 0.80 |
| FADE | PF3D7_0619900 | = | 2.48  | 0.97 |
| FADE | PF3D7_0521900 | = | 6.10  | 0.91 |
| FADE | PF3D7_1219300 | = | 5.02  | 0.96 |
| FADE | PF3D7_1133700 | = | 2.77  | 0.98 |
| FADE | PF3D7_0808700 | = | 6.82  | 0.97 |
| FADE | PF3D7_1136000 | = | 3.59  | 0.98 |
| FADE | PF3D7_0931000 | = | 1.55  | 0.94 |
| FADE | PF3D7_0830900 | = | 1.29  | 0.97 |
| FADE | PF3D7_1231800 | = | 6.04  | 0.94 |
| FADE | PF3D7_1035800 | = | 5.59  | 0.97 |
| FADE | PF3D7_1444100 | = | 13.55 | 0.99 |
| FADE | PF3D7_1138900 | = | 2.33  | 0.98 |
| FADE | PF3D7_1441800 | = | 0.83  | 0.97 |
| FADE | PF3D7_1345800 | = | 0.94  | 0.94 |
| FADE | PF3D7_1432400 | = | 2.38  | 0.99 |
| FADE | PF3D7_0819800 | = | 0.99  | 0.98 |
| FADE | PF3D7_1207800 | = | 0.33  | 0.83 |
| FADE | PF3D7_1143500 | = | 1.26  | 0.96 |
| FADE | PF3D7_1001600 | = | 0.40  | 0.88 |
| FADE | PF3D7_1019400 | = | 0.97  | 0.99 |
| FADE | PF3D7_1311900 | = | 0.67  | 0.93 |
| FADE | PF3D7_1035700 | = | 0.56  | 0.91 |
| FADE | PF3D7_1103100 | = | 0.68  | 0.99 |
| FADE | PF3D7_0812500 | = | 0.41  | 0.98 |
| FADE | PF3D7_1216100 | = | 1.11  | 0.99 |
| FADE | PF3D7_0206100 | = | 0.30  | 0.98 |
| FADE | PF3D7_1352500 | = | 0.33  | 0.98 |
| FADE | PF3D7_1226900 | = | 0.52  | 0.87 |
| FADE | PF3D7_1368800 | = | 0.11  | 0.99 |
| FADE | PF3D7_1432400 | = | 1.61  | 0.99 |
| FADE | PF3D7_1343900 | = | 0.75  | 0.98 |
| FADE | PF3D7_1328800 | = | 0.54  | 0.96 |
| FADE | PF3D7_1138700 | = | 0.02  | 0.97 |
| FADE | PF3D7_1327100 | = | 0.02  | 0.96 |
| FADE | PF3D7_1136600 | = | 0.01  | 0.92 |
| FADE | PF3D7_0902200 | = | 0.02  | 0.96 |
| FADE | PF3D7_0727100 | = | 0.02  | 0.96 |
| FADE | PF3D7_0105500 | = | 0.04  | 0.97 |
| FADE | PF3D7_1126100 | = | 0.03  | 0.97 |
| FADE | PF3D7_1343700 | = | 0.03  | 0.97 |
| FADE | PF3D7_1330500 | = | 8.78  | 0.99 |
| FADE | PF3D7_1343000 | = | 28.94 | 0.99 |
| FADE | PF3D7_1302000 | = | 4.82  | 0.97 |
| FADE | PF3D7_1107900 | = | 5.72  | 0.97 |
| FADE | PF3D7_0606000 | = | 13.88 | 0.99 |
| FADE | PF3D7_0614500 | = | 3.65  | 0.98 |
| FADE | PF3D7_0203700 | = | 2.87  | 0.96 |
| FADE | PF3D7_0601700 | = | 6.03  | 0.99 |

|      |               |   |      |      |
|------|---------------|---|------|------|
| FADE | PF3D7_1001900 | = | 1.49 | 0.98 |
| FADE | PF3D7_1409500 | = | 0.86 | 0.97 |
| FADE | PF3D7_0916700 | = | 1.05 | 0.94 |
| FADE | PF3D7_0402000 | = | 0.66 | 0.99 |
| FADE | PF3D7_0102600 | = | 6.24 | 0.93 |
| FADE | PF3D7_1433400 | = | 1.82 | 0.96 |
| FADE | PF3D7_0322000 | = | 1.83 | 0.95 |
| FADE | PF3D7_0623900 | = | 1.69 | 0.97 |
| FADE | PF3D7_1013500 | = | 0.42 | 0.99 |

|     |               |   |          |      |
|-----|---------------|---|----------|------|
| TLM | PF3D7_0811300 | = | 0.71     | 0.96 |
| TLM | PF3D7_1305500 | = | 0.84     | 0.97 |
| TLM | PF3D7_0615900 | = | 0.79     | 0.93 |
| TLM | PF3D7_1122900 | = | 1.23     | 0.90 |
| TLM | PF3D7_1141900 | = | 1.21     | 0.95 |
| TLM | PF3D7_1475600 | = | 0.44     | 0.93 |
| TLM | PF3D7_0211100 | = | 0.38     | 0.95 |
| TLM | PF3D7_0203000 | = | 0.44     | 0.97 |
| TLM | PF3D7_0404600 | = | 1.07     | 0.99 |
| TLM | PF3D7_0416500 | = | 1.12     | 0.96 |
| TLM | PF3D7_1018400 | > | 475.7 uM |      |
| TLM | PF3D7_0511500 | = | 0.00     | 0.74 |
| TLM | PF3D7_1360200 | = | 1.66     | 0.96 |
| TLM | PF3D7_0611800 | = | 1.45     | 0.95 |
| TLM | PF3D7_0619900 | = | 0.90     | 0.99 |
| TLM | PF3D7_0521900 | = | 2.12     | 0.99 |
| TLM | PF3D7_1219300 | = | 2.23     | 0.99 |
| TLM | PF3D7_1133700 | = | 63.36    | 0.91 |
| TLM | PF3D7_0808700 | = | 1.65     | 0.99 |
| TLM | PF3D7_1136000 | = | 1.83     | 1.00 |
| TLM | PF3D7_0931000 | = | 1.71     | 0.99 |
| TLM | PF3D7_0830900 | = | 0.82     | 0.96 |
| TLM | PF3D7_1231800 | = | 2.16     | 0.99 |
| TLM | PF3D7_1035800 | = | 1.74     | 0.98 |
| TLM | PF3D7_1444100 | = | 2.51     | 0.98 |
| TLM | PF3D7_0203600 | = | 0.93     | 0.96 |
| TLM | PF3D7_1138900 | = | 1.32     | 0.98 |
| TLM | PF3D7_1441800 | = | 0.54     | 0.95 |
| TLM | PF3D7_1345800 | = | 0.56     | 0.94 |
| TLM | PF3D7_1432400 | = | 1.23     | 0.99 |
| TLM | PF3D7_0819800 | = | 0.54     | 0.99 |
| TLM | PF3D7_1207800 | = | 0.31     | 0.94 |
| TLM | PF3D7_1143500 | = | 1.53     | 0.94 |
| TLM | PF3D7_1001600 | = | 1364.83  | 0.94 |
| TLM | PF3D7_1019400 | = | 0.42     | 0.96 |
| TLM | PF3D7_1311900 | = | 0.69     | 0.96 |
| TLM | PF3D7_1035700 | = | 0.58     | 0.99 |
| TLM | PF3D7_1103100 | > | 475.70   |      |
| TLM | PF3D7_0812500 | = | 0.63     | 0.93 |
| TLM | PF3D7_1216100 | = | 0.65     | 0.99 |

|     |               |   |        |      |
|-----|---------------|---|--------|------|
| TLM | PF3D7_0206100 | = | 0.87   | 0.96 |
| TLM | PF3D7_1352500 | = | 0.33   | 1.00 |
| TLM | PF3D7_1226900 | = | 0.81   | 0.95 |
| TLM | PF3D7_1368800 | = | 0.12   | 0.96 |
| TLM | PF3D7_1432400 | = | 0.82   | 0.99 |
| TLM | PF3D7_1343900 | > | 475.70 |      |
| TLM | PF3D7_1328800 | = | 2.33   | 0.89 |
| TLM | PF3D7_1138700 | = | 0.76   | 0.98 |
| TLM | PF3D7_1327100 | = | 0.42   | 0.99 |
| TLM | PF3D7_1136600 | = | 0.39   | 0.98 |
| TLM | PF3D7_0902200 | = | 0.48   | 0.98 |
| TLM | PF3D7_0727100 | = | 0.22   | 0.99 |
| TLM | PF3D7_0105500 | = | 0.43   | 0.98 |
| TLM | PF3D7_1126100 | = | 0.26   | 0.97 |
| TLM | PF3D7_1343700 | = | 0.22   | 0.99 |
| TLM | PF3D7_1330500 | = | 1.37   | 0.99 |
| TLM | PF3D7_1343000 | = | 3.05   | 0.99 |
| TLM | PF3D7_1302000 | = | 3.11   | 0.98 |
| TLM | PF3D7_0203700 | = | 0.43   | 0.99 |
| TLM | PF3D7_1107900 | = | 1.33   | 0.97 |
| TLM | PF3D7_0606000 | = | 1.60   | 0.98 |
| TLM | PF3D7_0614500 | = | 1.18   | 0.98 |
| TLM | PF3D7_0203700 | = | 0.97   | 0.99 |
| TLM | PF3D7_0601700 | = | 0.90   | 0.98 |

|     |               |   |      |      |
|-----|---------------|---|------|------|
| DAN | PF3D7_0811300 | = | 5.00 | 0.97 |
| DAN | PF3D7_1305500 | = | 1.30 | 0.97 |
| DAN | PF3D7_0615900 | = | 1.27 | 0.85 |
| DAN | PF3D7_1122900 | = | 1.70 | 0.94 |
| DAN | PF3D7_1141900 | = | 1.94 | 0.90 |
| DAN | PF3D7_1475600 | = | 0.30 | 0.90 |
| DAN | PF3D7_0211100 | = | 1.20 | 0.91 |
| DAN | PF3D7_0203000 | = | 1.27 | 0.99 |
| DAN | PF3D7_0404600 | = | 1.76 | 0.92 |
| DAN | PF3D7_0416500 | = | 1.21 | 0.98 |
| DAN | PF3D7_1018400 | = | 1.99 | 0.99 |
| DAN | PF3D7_0511500 | = | 1.61 | 1.00 |
| DAN | PF3D7_1360200 | = | 1.84 | 0.97 |
| DAN | PF3D7_0611800 | = | 1.79 | 0.94 |
| DAN | PF3D7_0619900 | = | 1.12 | 0.98 |
| DAN | PF3D7_0521900 | = | 3.17 | 1.00 |
| DAN | PF3D7_1219300 | = | 2.19 | 0.99 |
| DAN | PF3D7_1133700 | = | 1.37 | 0.99 |
| DAN | PF3D7_0808700 | = | 1.06 | 0.93 |
| DAN | PF3D7_1136000 | = | 1.27 | 0.98 |
| DAN | PF3D7_0931000 | = | 1.14 | 0.97 |
| DAN | PF3D7_0830900 | = | 0.84 | 0.84 |
| DAN | PF3D7_1231800 | = | 1.19 | 0.98 |
| DAN | PF3D7_1035800 | = | 1.11 | 0.95 |
| DAN | PF3D7_1444100 | = | 1.13 | 0.98 |

|     |               |   |      |      |
|-----|---------------|---|------|------|
| DAN | PF3D7_1138900 | = | 1.06 | 0.94 |
| DAN | PF3D7_1441800 | = | 0.98 | 0.96 |
| DAN | PF3D7_1345800 | = | 0.96 | 0.99 |
| DAN | PF3D7_1432400 | = | 1.33 | 1.00 |
| DAN | PF3D7_0819800 | = | 0.81 | 0.97 |
| DAN | PF3D7_1207800 | = | 0.76 | 0.94 |
| DAN | PF3D7_1143500 | = | 0.50 | 0.98 |
| DAN | PF3D7_1001600 | = | 1.81 | 0.85 |
| DAN | PF3D7_1019400 | = | 1.11 | 0.96 |
| DAN | PF3D7_1311900 | = | 0.60 | 0.94 |
| DAN | PF3D7_1035700 | = | 0.94 | 0.95 |
| DAN | PF3D7_1103100 | = | 0.84 | 0.98 |
| DAN | PF3D7_0812500 | = | 0.95 | 0.92 |

| Inhibitor | Column1 | GI50 (Mean±SD)       | R <sup>2</sup> |
|-----------|---------|----------------------|----------------|
| AL        | =       | 33.62±6.8 (n=8)      | 1.00           |
| ALLO      | =       | 610.09±82.7 (n=8)    | 0.81           |
| AM        | =       | 0.6±0.07 (n=8)       | 0.99           |
| AQ        | =       | 22.63±8.3 (n=8)      | 0.99           |
| AS        | =       | 0.94±0.03 (n=8)      | 0.99           |
| ATQ       | =       | 0.42±0.001 (n=8)     | 0.99           |
| BZD       | =       | 3684.7±536.2 (n=8)   | 0.91           |
| C-MIR     | =       | 186.01±37.9 (n=8)    | 0.91           |
| CG        | =       | 0.01±0.0008 (n=8)    | 0.99           |
| CQ        | =       | 0.03±0.009 (n=8)     | 0.99           |
| CRL       | =       | 17.7±2.54 (n=8)      | 0.98           |
| CUR       | =       | 20.97±0.6 (n=8)      | 0.91           |
| CYC       | =       | 158.96±32.65 (n=8)   | 0.97           |
| CYTD      | =       | 0.10±0.03 (n=8)      | 0.99           |
| DAN       | =       | 40.48±18.3 (n=8)     | 0.92           |
| DHA       | =       | 0.01±0.005 (n=8)     | 1.00           |
| DNR       | =       | 3.5±0.9 (n=8)        | 0.99           |
| DNTA      | =       | 8.14±2.6 (n=8)       | 0.91           |
| E-64      | =       | 0.61±0.23 (n=8)      | 0.99           |
| E-PPMP    | =       | 15.26±6.29 (n=8)     | 0.99           |
| EHNA      | =       | 134.8±5.1 (n=8)      | 0.99           |
| FADE      | =       | 1.8±0.3 (n=8)        | 0.93           |
| IB        | =       | 52.6±13.9 (n=8)      | 0.91           |
| LUMF      | =       | 10.6±2.8 (n=8)       | 0.95           |
| MFQ       | =       | 10.5±3.2 (n=8)       | 1.00           |
| MTX       | =       | 0.016±0.001 (n=8)    | 1.00           |
| MZB       | =       | 192.93±27.42 (n=8)   | 0.98           |
| PEP-A     | =       | 33.18±16.8 (n=8)     | 0.98           |
| PHEN      | =       | 0.84±0.07 (n=8)      | 0.89           |
| PIP       | =       | 4115.11±1119.6 (n=8) | 0.98           |
| PQ        | =       | 3.51±1.9 (n=10)      | 0.99           |
| PYR       | =       | 0.05±0.007 (n=8)     | 0.99           |
| QHS       | =       | 0.04±0.008 (n=8)     | 0.99           |
| ROT       | =       | 51.36±13.8 (n=8)     | 0.97           |
| SDZ       | =       | 874.6±92.7 (n=8)     | 0.98           |
| SF        | =       | 1.1±0.27 (n=8)       | 0.99           |
| SP        | =       | 4589.2±893.6 (n=8)   | 0.97           |
| T-MIR     | =       | 297.4±65.1 (n=8)     | 0.96           |
| T-PPMP    | =       | 1.16±0.03 (n=8)      | 0.99           |
| TCPA      | =       | 250.9±97.43 (n=8)    | 0.99           |
| TLM       | =       | 134.27±62.92 (n=8)   | 0.99           |
| TOFA      | =       | 75.34±12.8 (n=8)     | 0.98           |
| TRI       | =       | 20.29±5.61 (n=8)     | 0.97           |
| TSA       | =       | 0.03±0.01 (n=8)      | 0.99           |
| TTFA      | =       | 8.3±1.9 (n=8)        | 0.92           |
| VER       | =       | 3.72±1.4 (n=8)       | 0.99           |

TABLE S4

**SUMMARY OF HIGH-THROUGHPUT FORWARD GENETICS SCREEN**

The Wild Type values are the Mean±SD Growth Inhibition 50% (GI50) from all batches represented as uM units.



**TABLE S5**

| Drug1 | Drug2  | Correlation | Number of Permutation | SamePathway? |
|-------|--------|-------------|-----------------------|--------------|
| C-MIR | T-MIR  | 0.8369467   | 0                     | Yes          |
| DHA   | QHS    | 0.8201761   | 0                     | Yes          |
| CG    | MTX    | 0.7811595   | 0                     | Yes          |
| CG    | PYR    | 0.692375    | 0                     | Yes          |
| AM    | AS     | 0.6910947   | 0                     | Yes          |
| PEP-A | PQ     | 0.6465371   | 0                     | Yes          |
| FADE  | SF     | 0.6357308   | 0                     | Yes          |
| AM    | AL     | 0.6265279   | 0                     | Yes          |
| AQ    | PIP    | 0.6140244   | 0                     | Yes          |
| CRL   | TLM    | 0.5807819   | 0                     | Yes          |
| AS    | AL     | 0.5648325   | 0                     | Yes          |
| MTX   | PYR    | 0.5403937   | 0                     | Yes          |
| AQ    | MFQ    | 0.5214111   | 0                     | Yes          |
| E-64  | PQ     | 0.516537    | 0                     | Yes          |
| E-64  | PEP-A  | 0.5099284   | 0                     | Yes          |
| CQ    | VER    | 0.4964025   | 0                     | Yes          |
| CQ    | PEP-A  | 0.4951855   | 0                     | Yes          |
| ALLO  | EHNA   | 0.4878488   | 0                     | Yes          |
| CUR   | TSA    | 0.4631567   | 0                     | Yes          |
| MFQ   | PIP    | 0.444929    | 0                     | Yes          |
| ATQ   | ROT    | 0.4377922   | 0                     | Yes          |
| ALLO  | MZB    | 0.4260388   | 0                     | Yes          |
| AQ    | PEP-A  | 0.4210027   | 0                     | Yes          |
| CQ    | E-64   | 0.4188448   | 0                     | Yes          |
| PEP-A | PIP    | 0.4171183   | 0                     | Yes          |
| ATQ   | TTFA   | 0.4089251   | 0                     | Yes          |
| TCPA  | TLM    | 0.407226    | 0                     | Yes          |
| TOFA  | TRI    | 0.3955533   | 0                     | Yes          |
| CRL   | TOFA   | 0.3878575   | 0                     | Yes          |
| PIP   | PQ     | 0.3671882   | 0                     | Yes          |
| AQ    | PQ     | 0.3571045   | 3                     | Yes          |
| CQ    | PIP    | 0.3564938   | 2                     | Yes          |
| CRL   | TRI    | 0.3558507   | 3                     | Yes          |
| CQ    | PQ     | 0.346782    | 2                     | Yes          |
| BZD   | DNTA   | 0.3332943   | 1                     | Yes          |
| CRL   | TCPA   | 0.328903    | 1                     | Yes          |
| AM    | QHS    | 0.2768355   | 9                     | Yes          |
| TLM   | TOFA   | 0.2543435   | 27                    | Yes          |
| BZD   | CYTD   | 0.2533785   | 22                    | Yes          |
| MFQ   | PEP-A  | 0.2494083   | 22                    | Yes          |
| CYC   | T-MIR  | 0.2341463   | 31                    | Yes          |
| CYC   | E-PPMP | 0.2189928   | 58                    | Yes          |
| AQ    | CQ     | 0.2125273   | 41                    | Yes          |
| TLM   | TRI    | 0.2051632   | 77                    | Yes          |
| MFQ   | PQ     | 0.2015263   | 63                    | Yes          |
| AM    | DHA    | 0.1971373   | 74                    | Yes          |

|        |        |           |         |
|--------|--------|-----------|---------|
| AQ     | E-64   | 0.1934744 | 72 Yes  |
| AL     | QHS    | 0.1862745 | 101 Yes |
| E-PPMP | T-PPMP | 0.17744   | 120 Yes |
| AL     | DHA    | 0.1599851 | 135 Yes |
| CQ     | MFQ    | -0.003362 | 968 Yes |
| PYR    | SP     | -0.045484 | 700 Yes |
| TCPA   | TOFA   | -0.102755 | 371 Yes |
| PHEN   | ROT    | -0.140313 | 255 Yes |
| CG     | SDZ    | -0.154254 | 215 Yes |
| TCPA   | TRI    | -0.178942 | 104 Yes |
| MTX    | SDZ    | -0.284935 | 9 Yes   |
| CG     | SP     | -0.314556 | 7 Yes   |
| MTX    | SP     | -0.363091 | 2 Yes   |
| MZB    | VER    | 0.8368837 | 0 No    |
| CRL    | TSA    | 0.8343491 | 0 No    |
| E-PPMP | TOFA   | 0.8084237 | 0 No    |
| CRL    | FADE   | 0.7923113 | 0 No    |
| DAN    | IB     | 0.7885026 | 0 No    |
| BZD    | VER    | 0.7767861 | 0 No    |
| FADE   | TSA    | 0.755663  | 0 No    |
| DAN    | QHS    | 0.7540454 | 0 No    |
| SDZ    | TOFA   | 0.7503743 | 0 No    |
| PQ     | SF     | 0.735329  | 0 No    |
| CYTD   | E-PPMP | 0.7347192 | 0 No    |
| BZD    | MZB    | 0.7335443 | 0 No    |
| CYTD   | TOFA   | 0.7289716 | 0 No    |
| BZD    | DHA    | 0.7207736 | 0 No    |
| DAN    | PEP-A  | 0.7206721 | 0 No    |
| CRL    | VER    | 0.7149245 | 0 No    |
| PEP-A  | QHS    | 0.7095689 | 0 No    |
| AM     | AQ     | 0.7093496 | 0 No    |
| CRL    | MZB    | 0.695804  | 0 No    |
| E-64   | FADE   | 0.692732  | 0 No    |
| CYTD   | T-MIR  | 0.6907824 | 0 No    |
| FADE   | TTFA   | 0.6904662 | 0 No    |
| E-PPMP | T-MIR  | 0.6894535 | 0 No    |
| DHA    | PQ     | 0.6826046 | 0 No    |
| MZB    | PQ     | 0.6792721 | 0 No    |
| DNTA   | ROT    | 0.6775938 | 0 No    |
| DHA    | MZB    | 0.6753282 | 0 No    |
| DHA    | VER    | 0.6742987 | 0 No    |
| BZD    | CRL    | 0.6740019 | 0 No    |
| ALLO   | TLM    | 0.6736943 | 0 No    |
| E-PPMP | SDZ    | 0.6716296 | 0 No    |
| ALLO   | FADE   | 0.6681572 | 0 No    |
| AQ     | LUMF   | 0.6674609 | 0 No    |
| ALLO   | CRL    | 0.6665495 | 0 No    |
| DHA    | SF     | 0.6627349 | 0 No    |

|       |       |           |      |
|-------|-------|-----------|------|
| FADE  | TLM   | 0.6603972 | 0 No |
| IB    | QHS   | 0.6572416 | 0 No |
| BZD   | FADE  | 0.6566104 | 0 No |
| CYC   | EHNA  | 0.6530137 | 0 No |
| CRL   | DHA   | 0.6525773 | 0 No |
| PEP-A | SF    | 0.652262  | 0 No |
| SF    | TTFA  | 0.6513548 | 0 No |
| BZD   | SF    | 0.6468041 | 0 No |
| AM    | LUMF  | 0.6452837 | 0 No |
| DHA   | PEP-A | 0.642184  | 0 No |
| DHA   | FADE  | 0.6417323 | 0 No |
| FADE  | VER   | 0.6402927 | 0 No |
| CRL   | TTFA  | 0.6365054 | 0 No |
| TTFA  | TLM   | 0.6344263 | 0 No |
| CYC   | TTFA  | 0.6343003 | 0 No |
| DHA   | E-64  | 0.6337406 | 0 No |
| PQ    | VER   | 0.6330921 | 0 No |
| CRL   | E-64  | 0.6320478 | 0 No |
| FADE  | QHS   | 0.6312247 | 0 No |
| CUR   | SDZ   | 0.6254527 | 0 No |
| AM    | MFQ   | 0.6239784 | 0 No |
| DAN   | LUMF  | 0.6206293 | 0 No |
| FADE  | MZB   | 0.6205059 | 0 No |
| SP    | T-MIR | 0.6179348 | 0 No |
| E-64  | TSA   | 0.617898  | 0 No |
| C-MIR | SP    | 0.6163427 | 0 No |
| IB    | PEP-A | 0.6163053 | 0 No |
| ALLO  | E-64  | 0.6160717 | 0 No |
| QHS   | SF    | 0.6152161 | 0 No |
| C-MIR | LUMF  | 0.6148635 | 0 No |
| T-MIR | TOFA  | 0.6145438 | 0 No |
| E-64  | TLM   | 0.6139849 | 0 No |
| E-64  | SF    | 0.6137829 | 0 No |
| ATQ   | LUMF  | 0.6129438 | 0 No |
| EHNA  | TTFA  | 0.6084963 | 0 No |
| QHS   | TTFA  | 0.6073151 | 0 No |
| DHA   | TSA   | 0.604367  | 0 No |
| PEP-A | VER   | 0.6002066 | 0 No |
| ALLO  | TSA   | 0.5977326 | 0 No |
| BZD   | PQ    | 0.5974484 | 0 No |
| BZD   | E-64  | 0.5969093 | 0 No |
| SF    | VER   | 0.5966531 | 0 No |
| CRL   | CYC   | 0.5966479 | 0 No |
| DAN   | SF    | 0.5964024 | 0 No |
| BZD   | TSA   | 0.5962165 | 0 No |
| AL    | C-MIR | 0.5949672 | 0 No |
| CRL   | PEP-A | 0.5928739 | 0 No |
| TTFA  | TSA   | 0.591252  | 0 No |

|       |        |           |      |
|-------|--------|-----------|------|
| LUMF  | PEP-A  | 0.5890616 | 0 No |
| C-MIR | E-PPMP | 0.5889792 | 0 No |
| CUR   | TOFA   | 0.5887341 | 0 No |
| CYC   | FADE   | 0.5854562 | 0 No |
| CUR   | E-PPMP | 0.5849401 | 0 No |
| AL    | T-MIR  | 0.5823655 | 0 No |
| CRL   | SF     | 0.5823639 | 0 No |
| QHS   | VER    | 0.5805494 | 0 No |
| LUMF  | MFQ    | 0.5802332 | 0 No |
| FADE  | PEP-A  | 0.578907  | 0 No |
| PEP-A | TTFA   | 0.5778633 | 0 No |
| FADE  | PQ     | 0.5775439 | 0 No |
| CYC   | E-64   | 0.5771035 | 0 No |
| C-MIR | PIP    | 0.5743902 | 0 No |
| EHNA  | PHEN   | 0.5740483 | 0 No |
| BZD   | PEP-A  | 0.5711674 | 0 No |
| BZD   | CQ     | 0.570494  | 0 No |
| SP    | TRI    | 0.5704615 | 0 No |
| EHNA  | FADE   | 0.5697664 | 0 No |
| LUMF  | T-MIR  | 0.5674264 | 0 No |
| CRL   | QHS    | 0.5660001 | 0 No |
| AS    | MFQ    | 0.5651457 | 0 No |
| E-64  | TTFA   | 0.563108  | 0 No |
| E-64  | QHS    | 0.5617819 | 0 No |
| CRL   | PQ     | 0.561173  | 0 No |
| ATQ   | C-MIR  | 0.5605917 | 0 No |
| BZD   | QHS    | 0.5600225 | 0 No |
| TSA   | VER    | 0.5593993 | 0 No |
| ATQ   | DNTA   | 0.5576797 | 0 No |
| ALLO  | DHA    | 0.5574207 | 0 No |
| PQ    | QHS    | 0.5572312 | 0 No |
| CRL   | EHNA   | 0.5571063 | 0 No |
| C-MIR | CYTD   | 0.5569394 | 0 No |
| MZB   | SF     | 0.5563943 | 0 No |
| AM    | C-MIR  | 0.5554201 | 0 No |
| AQ    | C-MIR  | 0.5547877 | 0 No |
| DHA   | TLM    | 0.5546826 | 0 No |
| AM    | T-MIR  | 0.5500678 | 0 No |
| DAN   | TTFA   | 0.5491486 | 0 No |
| AS    | T-MIR  | 0.5478125 | 0 No |
| AQ    | DAN    | 0.5462686 | 0 No |
| LUMF  | QHS    | 0.54586   | 0 No |
| AS    | SP     | 0.5456475 | 0 No |
| MZB   | TSA    | 0.5452811 | 0 No |
| CQ    | QHS    | 0.5433711 | 0 No |
| PQ    | TTFA   | 0.5420936 | 0 No |
| C-MIR | TOFA   | 0.5411472 | 0 No |
| ALLO  | CYC    | 0.540131  | 0 No |

|       |       |           |      |
|-------|-------|-----------|------|
| TTFA  | VER   | 0.5398804 | 0 No |
| LUMF  | PQ    | 0.53789   | 0 No |
| DHA   | TTFA  | 0.5373935 | 0 No |
| EHNA  | TCPA  | 0.5367684 | 0 No |
| AM    | ROT   | 0.5364168 | 0 No |
| CYC   | VER   | 0.5360464 | 0 No |
| QHS   | TSA   | 0.5341592 | 0 No |
| LUMF  | PIP   | 0.5341155 | 0 No |
| CYC   | TLM   | 0.5335141 | 0 No |
| MZB   | PEP-A | 0.532972  | 0 No |
| ALLO  | QHS   | 0.532442  | 0 No |
| C-MIR | FADE  | 0.5309395 | 0 No |
| CYC   | TSA   | 0.5299126 | 0 No |
| LUMF  | TTFA  | 0.5290514 | 0 No |
| CYC   | QHS   | 0.5271348 | 0 No |
| EHNA  | VER   | 0.5266602 | 0 No |
| SDZ   | TSA   | 0.5249928 | 0 No |
| ALLO  | BZD   | 0.5232302 | 0 No |
| LUMF  | SF    | 0.522612  | 0 No |
| AS    | TOFA  | 0.5204862 | 0 No |
| TLM   | TSA   | 0.5192728 | 0 No |
| PHEN  | TLM   | 0.5186996 | 0 No |
| AM    | SP    | 0.5180924 | 0 No |
| CUR   | TRI   | 0.5177226 | 0 No |
| CRL   | PHEN  | 0.5174875 | 0 No |
| CYC   | DHA   | 0.5173654 | 0 No |
| CQ    | FADE  | 0.5161152 | 0 No |
| SF    | TSA   | 0.5156988 | 0 No |
| IB    | TTFA  | 0.5155546 | 0 No |
| TLM   | VER   | 0.5147451 | 0 No |
| CYC   | MZB   | 0.5140244 | 0 No |
| CYC   | SF    | 0.5128078 | 0 No |
| AS    | PIP   | 0.51274   | 0 No |
| BZD   | CYC   | 0.5122832 | 0 No |
| DAN   | VER   | 0.5113964 | 0 No |
| MZB   | QHS   | 0.5102645 | 0 No |
| LUMF  | SP    | 0.5093441 | 0 No |
| C-MIR | ROT   | 0.5093385 | 0 No |
| C-MIR | TRI   | 0.5083136 | 0 No |
| ALLO  | TTFA  | 0.5076729 | 0 No |
| PEP-A | TSA   | 0.5074189 | 0 No |
| AS    | LUMF  | 0.5063178 | 0 No |
| SF    | TLM   | 0.5063118 | 0 No |
| AS    | C-MIR | 0.5059423 | 0 No |
| C-MIR | SF    | 0.5054342 | 0 No |
| AQ    | SP    | 0.5048809 | 0 No |
| ATQ   | CRL   | 0.5047351 | 0 No |
| CYC   | IB    | 0.5039973 | 0 No |

|        |        |           |      |
|--------|--------|-----------|------|
| LUMF   | ROT    | 0.5039776 | 0 No |
| AS     | ATQ    | 0.5036049 | 0 No |
| CYTD   | SDZ    | 0.5023877 | 0 No |
| QHS    | TLM    | 0.5017934 | 0 No |
| E-64   | VER    | 0.501643  | 0 No |
| BZD    | TTFA   | 0.4991708 | 0 No |
| CUR    | CYTD   | 0.4989188 | 0 No |
| AS     | TRI    | 0.4985264 | 0 No |
| ATQ    | T-MIR  | 0.4963866 | 0 No |
| PHEN   | TSA    | 0.4962986 | 0 No |
| AL     | TRI    | 0.4953534 | 0 No |
| BZD    | EHNA   | 0.4951407 | 0 No |
| FADE   | PHEN   | 0.4939302 | 0 No |
| PQ     | TSA    | 0.4937583 | 0 No |
| DAN    | FADE   | 0.4936483 | 0 No |
| AS     | E-PPMP | 0.4908113 | 0 No |
| AM     | ATQ    | 0.4906278 | 0 No |
| ALLO   | VER    | 0.4900095 | 0 No |
| DAN    | DHA    | 0.4885406 | 0 No |
| IB     | SF     | 0.4883948 | 0 No |
| ROT    | T-MIR  | 0.4881095 | 0 No |
| IB     | VER    | 0.4870624 | 0 No |
| AL     | MFQ    | 0.4866184 | 0 No |
| PHEN   | TCPA   | 0.485882  | 0 No |
| SP     | TOFA   | 0.4855041 | 0 No |
| ATQ    | SP     | 0.4854476 | 0 No |
| FADE   | T-MIR  | 0.4852529 | 0 No |
| PQ     | TLM    | 0.4844413 | 0 No |
| ATQ    | PEP-A  | 0.4836947 | 0 No |
| BZD    | TLM    | 0.4831567 | 0 No |
| DAN    | PQ     | 0.4826753 | 0 No |
| ATQ    | BZD    | 0.4822785 | 0 No |
| CRL    | T-PPMP | 0.4819766 | 0 No |
| DHA    | IB     | 0.4817707 | 0 No |
| CRL    | SDZ    | 0.4805461 | 0 No |
| CQ     | MZB    | 0.4794628 | 0 No |
| E-PPMP | SP     | 0.4792484 | 0 No |
| CQ     | TSA    | 0.4785023 | 0 No |
| CYC    | PEP-A  | 0.4781617 | 0 No |
| EHNA   | MZB    | 0.4780859 | 0 No |
| AS     | ROT    | 0.4773848 | 0 No |
| MZB    | TLM    | 0.4771761 | 0 No |
| FADE   | SDZ    | 0.4756125 | 0 No |
| DHA    | ROT    | 0.4755479 | 0 No |
| AL     | ROT    | 0.4754538 | 0 No |
| CYTD   | SP     | 0.4736982 | 0 No |
| EHNA   | TLM    | 0.4731869 | 0 No |
| AQ     | AS     | 0.4731847 | 0 No |

|        |        |           |      |
|--------|--------|-----------|------|
| AM     | PIP    | 0.4729675 | 0 No |
| DAN    | MFQ    | 0.4710196 | 0 No |
| IB     | LUMF   | 0.4704295 | 0 No |
| DNTA   | TOFA   | 0.4696583 | 0 No |
| AQ     | ATQ    | 0.4687444 | 0 No |
| PIP    | TOFA   | 0.4685411 | 0 No |
| DNTA   | E-PPMP | 0.4684726 | 0 No |
| CYTD   | FADE   | 0.4683318 | 0 No |
| AS     | CYTD   | 0.4681199 | 0 No |
| CQ     | DHA    | 0.4674676 | 0 No |
| ALLO   | PQ     | 0.4632027 | 0 No |
| PEP-A  | TLM    | 0.4621993 | 0 No |
| AL     | SP     | 0.4620535 | 0 No |
| AQ     | QHS    | 0.4617539 | 0 No |
| ALLO   | SF     | 0.4612153 | 0 No |
| PIP    | TRI    | 0.4604362 | 0 No |
| DHA    | T-PPMP | 0.4581037 | 0 No |
| E-PPMP | ROT    | 0.4568757 | 0 No |
| CYC    | DAN    | 0.4549961 | 0 No |
| ATQ    | FADE   | 0.4545619 | 0 No |
| FADE   | LUMF   | 0.4541015 | 0 No |
| AL     | E-PPMP | 0.4538982 | 0 No |
| BZD    | IB     | 0.4522269 | 1 No |
| BZD    | C-MIR  | 0.4521331 | 0 No |
| AL     | LUMF   | 0.4518795 | 0 No |
| ATQ    | CYTD   | 0.4513262 | 0 No |
| DAN    | PIP    | 0.4505923 | 1 No |
| C-MIR  | PEP-A  | 0.4500452 | 0 No |
| C-MIR  | DNTA   | 0.4499989 | 0 No |
| PIP    | T-MIR  | 0.4499322 | 0 No |
| MZB    | TTFA   | 0.4496324 | 0 No |
| ATQ    | TRI    | 0.4490766 | 0 No |
| CRL    | CUR    | 0.4480453 | 0 No |
| AQ     | AL     | 0.4474732 | 0 No |
| CUR    | SP     | 0.4471144 | 0 No |
| CYC    | PQ     | 0.4467279 | 0 No |
| ATQ    | MZB    | 0.445551  | 0 No |
| DHA    | DNTA   | 0.4446389 | 0 No |
| FADE   | PIP    | 0.4434282 | 0 No |
| LUMF   | TRI    | 0.4430493 | 0 No |
| ATQ    | TSA    | 0.4403442 | 0 No |
| C-MIR  | TSA    | 0.4398135 | 0 No |
| E-64   | ROT    | 0.4374785 | 0 No |
| DIA    | TLM    | 0.4364082 | 0 No |
| SF     | T-MIR  | 0.4362491 | 0 No |
| E-PPMP | TRI    | 0.4354586 | 0 No |
| DAN    | TSA    | 0.4345111 | 0 No |
| ATQ    | VER    | 0.4340133 | 0 No |

|        |        |           |      |
|--------|--------|-----------|------|
| DNTA   | LUMF   | 0.4338481 | 0 No |
| ALLO   | PEP-A  | 0.4336269 | 0 No |
| PHEN   | TTFA   | 0.433622  | 0 No |
| PIP    | TSA    | 0.433456  | 0 No |
| LUMF   | TOFA   | 0.4326244 | 0 No |
| AQ     | T-MIR  | 0.4317525 | 0 No |
| AQ     | TSA    | 0.4314799 | 0 No |
| CUR    | FADE   | 0.4308516 | 0 No |
| C-MIR  | SDZ    | 0.4307496 | 0 No |
| PIP    | SP     | 0.4307048 | 1 No |
| E-64   | E-PPMP | 0.430637  | 0 No |
| CUR    | MZB    | 0.4303434 | 0 No |
| QHS    | T-PPMP | 0.430037  | 0 No |
| EHNA   | TSA    | 0.4291638 | 0 No |
| CUR    | DNTA   | 0.4284561 | 0 No |
| E-64   | MZB    | 0.427927  | 0 No |
| E-PPMP | FADE   | 0.4273713 | 0 No |
| ROT    | TRI    | 0.4273269 | 0 No |
| C-MIR  | MFQ    | 0.4268083 | 0 No |
| AS     | DNTA   | 0.4263783 | 0 No |
| E-PPMP | SF     | 0.4252621 | 0 No |
| MFQ    | T-MIR  | 0.4243907 | 0 No |
| CRL    | CQ     | 0.4242829 | 0 No |
| ROT    | TOFA   | 0.4236771 | 0 No |
| ROT    | SP     | 0.4236231 | 0 No |
| AL     | PIP    | 0.4233651 | 0 No |
| CRL    | DAN    | 0.4230828 | 0 No |
| IB     | PQ     | 0.4225747 | 0 No |
| C-MIR  | DHA    | 0.4219531 | 1 No |
| C-MIR  | TTFA   | 0.4218882 | 1 No |
| PQ     | SDZ    | 0.4198061 | 0 No |
| C-MIR  | QHS    | 0.4190248 | 0 No |
| PIP    | VER    | 0.4184757 | 0 No |
| PIP    | QHS    | 0.4182795 | 0 No |
| C-MIR  | CRL    | 0.4181435 | 0 No |
| TOFA   | TSA    | 0.4169019 | 0 No |
| IB     | MZB    | 0.4156504 | 0 No |
| ALLO   | PIP    | 0.4147245 | 0 No |
| AQ     | SDZ    | 0.4129405 | 0 No |
| FADE   | TOFA   | 0.4119467 | 0 No |
| FADE   | IB     | 0.4116305 | 0 No |
| CYTD   | TTFA   | 0.4073263 | 1 No |
| ALLO   | TCPA   | 0.4072042 | 0 No |
| EHNA   | SF     | 0.4071245 | 2 No |
| SP     | SDZ    | 0.4064786 | 0 No |
| LUMF   | TSA    | 0.4062219 | 2 No |
| DNTA   | SDZ    | 0.4053184 | 0 No |
| DHA    | LUMF   | 0.4033901 | 0 No |



|        |        |           |      |
|--------|--------|-----------|------|
| PEP-A  | T-MIR  | 0.4019648 | 0 No |
| C-MIR  | CUR    | 0.4014928 | 0 No |
| SDZ    | T-MIR  | 0.4013494 | 1 No |
| C-MIR  | TLM    | 0.4013122 | 0 No |
| ATQ    | TOFA   | 0.4005194 | 1 No |
| MZB    | SDZ    | 0.4003639 | 1 No |
| CUR    | TTFA   | 0.3993123 | 1 No |
| ATQ    | CUR    | 0.3991441 | 0 No |
| CYTD   | DNTA   | 0.3990537 | 0 No |
| DNTA   | T-PPMP | 0.3978319 | 0 No |
| E-PPMP | TSA    | 0.3969715 | 0 No |
| MFQ    | TRI    | 0.3968504 | 0 No |
| T-MIR  | TTFA   | 0.3962104 | 0 No |
| CYC    | PHEN   | 0.3953722 | 1 No |
| CYTD   | DIA    | 0.3950529 | 1 No |
| CYTD   | LUMF   | 0.3948576 | 0 No |
| MFQ    | SP     | 0.3948508 | 0 No |
| C-MIR  | CQ     | 0.3942079 | 0 No |
| ATQ    | PIP    | 0.3941509 | 0 No |
| E-64   | T-MIR  | 0.393261  | 1 No |
| CQ     | DAN    | 0.3930038 | 1 No |
| AQ     | IB     | 0.3927733 | 0 No |
| CRL    | PIP    | 0.391233  | 0 No |
| ROT    | SDZ    | 0.391011  | 0 No |
| MZB    | T-PPMP | 0.3909349 | 0 No |
| PIP    | ROT    | 0.3893719 | 0 No |
| T-PPMP | TSA    | 0.3889676 | 0 No |
| PEP-A  | T-PPMP | 0.388654  | 2 No |
| CUR    | DIA    | 0.3880534 | 0 No |
| CUR    | SF     | 0.3875213 | 0 No |
| CQ     | TRI    | 0.3871959 | 2 No |
| PIP    | SDZ    | 0.387142  | 0 No |
| DIA    | TOFA   | 0.3863366 | 2 No |
| PEP-A  | SP     | 0.3862036 | 0 No |
| CUR    | DHA    | 0.3859201 | 0 No |
| AQ     | SF     | 0.3857745 | 0 No |
| BZD    | SDZ    | 0.3852458 | 1 No |
| PQ     | T-PPMP | 0.3851782 | 1 No |
| E-64   | IB     | 0.3850406 | 0 No |
| C-MIR  | PQ     | 0.3848599 | 0 No |
| AQ     | CRL    | 0.3842475 | 1 No |
| DIA    | DNTA   | 0.3810275 | 1 No |
| PQ     | ROT    | 0.3805324 | 1 No |
| CQ     | IB     | 0.3804506 | 1 No |
| ATQ    | QHS    | 0.3801576 | 1 No |
| PIP    | TTFA   | 0.3800404 | 1 No |
| CRL    | LUMF   | 0.3773815 | 0 No |
| CRL    | CYTD   | 0.3772665 | 0 No |

|        |        |           |      |
|--------|--------|-----------|------|
| DHA    | DIA    | 0.3767768 | 0 No |
| DNTA   | T-MIR  | 0.37677   | 0 No |
| ALLO   | DAN    | 0.3764722 | 2 No |
| ATQ    | DAN    | 0.3762351 | 1 No |
| CUR    | QHS    | 0.3761963 | 0 No |
| GYLP   | PHEN   | 0.3761643 | 4 No |
| AQ     | TOFA   | 0.3747516 | 0 No |
| DIA    | T-PPMP | 0.3745648 | 3 No |
| ATQ    | PQ     | 0.3744149 | 0 No |
| E-PPMP | LUMF   | 0.3731503 | 2 No |
| CYC    | T-PPMP | 0.3727889 | 1 No |
| T-MIR  | TRI    | 0.3727099 | 2 No |
| ATQ    | E-PPMP | 0.3724255 | 0 No |
| E-64   | LUMF   | 0.3721248 | 1 No |
| ATQ    | E-64   | 0.3719646 | 1 No |
| DNTA   | TRI    | 0.3714141 | 0 No |
| E-64   | SDZ    | 0.3710832 | 1 No |
| IB     | T-PPMP | 0.3707903 | 0 No |
| DAN    | E-64   | 0.3707493 | 1 No |
| ALLO   | T-PPMP | 0.3706999 | 1 No |
| ATQ    | SF     | 0.3704176 | 1 No |
| CUR    | T-PPMP | 0.369426  | 1 No |
| QHS    | ROT    | 0.3680609 | 0 No |
| AQ     | VER    | 0.3679108 | 1 No |
| BZD    | DAN    | 0.3671259 | 0 No |
| T-PPMP | TLM    | 0.3665503 | 4 No |
| CYTD   | PIP    | 0.3660159 | 0 No |
| ATQ    | CYC    | 0.3656504 | 0 No |
| ATQ    | DHA    | 0.3637164 | 1 No |
| EHNA   | PEP-A  | 0.3622255 | 1 No |
| SDZ    | TRI    | 0.3613104 | 1 No |
| ALLO   | CQ     | 0.3609553 | 1 No |
| AQ     | DHA    | 0.3601931 | 2 No |
| DAN    | MZB    | 0.3594327 | 3 No |
| DHA    | E-PPMP | 0.3576861 | 0 No |
| ATQ    | SDZ    | 0.3572608 | 2 No |
| T-PPMP | TTFA   | 0.357165  | 0 No |
| C-MIR  | VER    | 0.3570594 | 0 No |
| CRL    | IB     | 0.3564229 | 2 No |
| DNTA   | MZB    | 0.3562185 | 2 No |
| AM     | DAN    | 0.3561355 | 0 No |
| ROT    | SF     | 0.3558592 | 0 No |
| AL     | ATQ    | 0.3552979 | 0 No |
| E-64   | T-PPMP | 0.3551418 | 3 No |
| C-MIR  | E-64   | 0.3539202 | 1 No |
| CYTD   | TSA    | 0.3533826 | 0 No |
| E-PPMP | PQ     | 0.3531072 | 2 No |
| DHA    | SDZ    | 0.3524285 | 3 No |

|        |        |           |      |
|--------|--------|-----------|------|
| AQ     | ROT    | 0.3521082 | 2 No |
| QHS    | SP     | 0.3519295 | 0 No |
| CYTD   | PEP-A  | 0.35163   | 2 No |
| SF     | SDZ    | 0.3506205 | 4 No |
| E-64   | EHNA   | 0.3504711 | 4 No |
| IB     | TSA    | 0.3501434 | 2 No |
| AQ     | FADE   | 0.3500226 | 1 No |
| C-MIR  | DAN    | 0.349349  | 3 No |
| DNTA   | PQ     | 0.3482144 | 0 No |
| IB     | PIP    | 0.3471319 | 0 No |
| SDZ    | T-PPMP | 0.3468331 | 0 No |
| SF     | TRI    | 0.3467067 | 0 No |
| SP     | TTFA   | 0.3463586 | 1 No |
| CQ     | SF     | 0.3456356 | 2 No |
| BZD    | E-PPMP | 0.3456165 | 2 No |
| CRL    | DNTA   | 0.3451792 | 3 No |
| CQ     | CUR    | 0.343834  | 3 No |
| CUR    | LUMF   | 0.3435337 | 3 No |
| DIA    | E-PPMP | 0.3430822 | 6 No |
| E-PPMP | TTFA   | 0.3425174 | 2 No |
| E-64   | TOFA   | 0.3424929 | 4 No |
| AQ     | TRI    | 0.3417363 | 3 No |
| ALLO   | LUMF   | 0.3414202 | 3 No |
| E-64   | PHEN   | 0.341281  | 4 No |
| QHS    | TRI    | 0.3393953 | 2 No |
| DIA    | PHEN   | 0.3392533 | 8 No |
| DIA    | E-64   | 0.3386194 | 3 No |
| CUR    | PQ     | 0.3381813 | 3 No |
| SDZ    | VER    | 0.3377506 | 4 No |
| CYC    | TCPA   | 0.337421  | 0 No |
| T-PPMP | TOFA   | 0.3362937 | 1 No |
| CRL    | E-PPMP | 0.3362869 | 2 No |
| TSA    | TRI    | 0.3355221 | 4 No |
| TTFA   | TRI    | 0.3354167 | 1 No |
| T-MIR  | TSA    | 0.3344701 | 0 No |
| FADE   | TRI    | 0.3310656 | 4 No |
| DHA    | TOFA   | 0.3306513 | 2 No |
| PQ     | TOFA   | 0.329688  | 2 No |
| BZD    | PIP    | 0.3290202 | 1 No |
| TTFA   | TOFA   | 0.3288542 | 3 No |
| T-MIR  | TLM    | 0.3281778 | 5 No |
| SP     | SF     | 0.3276799 | 1 No |
| DHA    | PIP    | 0.3269134 | 2 No |
| ATQ    | CQ     | 0.3263248 | 5 No |
| PEP-A  | TRI    | 0.3261762 | 6 No |
| DAN    | EHNA   | 0.3259964 | 8 No |
| AQ     | BZD    | 0.3256212 | 5 No |
| LUMF   | TLM    | 0.3250313 | 9 No |

|        |        |           |       |
|--------|--------|-----------|-------|
| T-PPMP | VER    | 0.3246649 | 3 No  |
| EHNA   | QHS    | 0.3232551 | 5 No  |
| MFQ    | QHS    | 0.3229378 | 7 No  |
| DNTA   | E-64   | 0.322762  | 4 No  |
| DIA    | SDZ    | 0.3213199 | 4 No  |
| ATQ    | MFQ    | 0.3209648 | 7 No  |
| PQ     | TRI    | 0.3207805 | 5 No  |
| CUR    | T-MIR  | 0.319322  | 4 No  |
| LUMF   | T-PPMP | 0.3181664 | 2 No  |
| EHNA   | IB     | 0.31782   | 6 No  |
| SDZ    | TTFA   | 0.3177279 | 3 No  |
| E-64   | TRI    | 0.31728   | 5 No  |
| DNTA   | SP     | 0.3171329 | 3 No  |
| DIA    | MZB    | 0.3169619 | 2 No  |
| SP     | TSA    | 0.3167321 | 2 No  |
| CRL    | SP     | 0.3166451 | 3 No  |
| AS     | SDZ    | 0.3166115 | 5 No  |
| AM     | TRI    | 0.315607  | 5 No  |
| CYTD   | TRI    | 0.3153509 | 7 No  |
| CYTD   | E-64   | 0.3146056 | 12 No |
| CYC    | LUMF   | 0.3143536 | 4 No  |
| DAN    | SP     | 0.3143233 | 6 No  |
| ATQ    | IB     | 0.3140018 | 3 No  |
| CQ     | TLM    | 0.3128507 | 18 No |
| SF     | TOFA   | 0.3126373 | 5 No  |
| CYTD   | TLM    | 0.3124688 | 10 No |
| DAN    | T-MIR  | 0.3122777 | 4 No  |
| BZD    | CUR    | 0.3122128 | 6 No  |
| ATQ    | T-PPMP | 0.3121404 | 2 No  |
| LUMF   | SDZ    | 0.3103349 | 9 No  |
| ALLO   | ATQ    | 0.3101174 | 4 No  |
| AM     | TOFA   | 0.3075881 | 9 No  |
| ALLO   | PHEN   | 0.3061704 | 11 No |
| CYTD   | T-PPMP | 0.3058317 | 5 No  |
| AM     | SF     | 0.3057267 | 5 No  |
| CUR    | VER    | 0.3045258 | 7 No  |
| SDZ    | TLM    | 0.3045148 | 6 No  |
| DAN    | TLM    | 0.3044931 | 4 No  |
| CQ     | TTFA   | 0.3044384 | 7 No  |
| BZD    | T-MIR  | 0.3034459 | 9 No  |
| PQ     | T-MIR  | 0.3032086 | 9 No  |
| DAN    | T-PPMP | 0.3031555 | 7 No  |
| DHA    | EHNA   | 0.3028277 | 5 No  |
| LUMF   | VER    | 0.3027586 | 11 No |
| IB     | TLM    | 0.3027032 | 14 No |
| BZD    | ROT    | 0.3024684 | 8 No  |
| AM     | E-PPMP | 0.3019648 | 8 No  |
| CYTD   | SF     | 0.30184   | 7 No  |

|        |        |           |       |
|--------|--------|-----------|-------|
| QHS    | T-MIR  | 0.3016554 | 7 No  |
| FADE   | T-PPMP | 0.3013567 | 6 No  |
| CYC    | PIP    | 0.3010614 | 10 No |
| ALLO   | ROT    | 0.300594  | 4 No  |
| DIA    | ROT    | 0.3005857 | 13 No |
| PEP-A  | ROT    | 0.3005262 | 5 No  |
| AQ     | CYTD   | 0.2988855 | 9 No  |
| CYTD   | ROT    | 0.2986099 | 8 No  |
| ROT    | TLM    | 0.2981996 | 14 No |
| AQ     | MZB    | 0.2980578 | 6 No  |
| E-PPMP | TLM    | 0.2977342 | 10 No |
| AQ     | CYC    | 0.2976513 | 7 No  |
| AM     | DNTA   | 0.2957045 | 10 No |
| CRL    | DIA    | 0.2955322 | 14 No |
| DHA    | T-MIR  | 0.2954067 | 14 No |
| AQ     | DNTA   | 0.2950947 | 2 No  |
| CUR    | PEP-A  | 0.294559  | 10 No |
| ATQ    | TLM    | 0.29434   | 20 No |
| FADE   | SP     | 0.294288  | 5 No  |
| AL     | DNTA   | 0.2932389 | 13 No |
| DNTA   | PEP-A  | 0.2929154 | 4 No  |
| CQ     | SP     | 0.2929044 | 13 No |
| CYTD   | VER    | 0.2920838 | 10 No |
| ALLO   | C-MIR  | 0.2915537 | 11 No |
| CYTD   | IB     | 0.2911957 | 7 No  |
| TOFA   | VER    | 0.2910021 | 9 No  |
| CUR    | E-64   | 0.2893664 | 8 No  |
| TCPA   | TTFA   | 0.28931   | 17 No |
| AL     | CYTD   | 0.2888599 | 8 No  |
| PIP    | TLM    | 0.2885312 | 19 No |
| AQ     | E-PPMP | 0.2882114 | 8 No  |
| CQ     | EHNA   | 0.2869971 | 18 No |
| C-MIR  | MZB    | 0.2855917 | 13 No |
| CRL    | T-MIR  | 0.2847398 | 8 No  |
| ALLO   | IB     | 0.2838076 | 8 No  |
| CYTD   | DAN    | 0.2836277 | 13 No |
| E-PPMP | PIP    | 0.2836043 | 4 No  |
| TRI    | VER    | 0.2829752 | 9 No  |
| MZB    | PHEN   | 0.2828974 | 18 No |
| GYLP   | TLM    | 0.2820219 | 28 No |
| DHA    | TRI    | 0.281586  | 15 No |
| QHS    | TOFA   | 0.2811491 | 18 No |
| EHNA   | PQ     | 0.2808003 | 14 No |
| E-64   | SP     | 0.280762  | 6 No  |
| DNTA   | VER    | 0.2803038 | 13 No |
| CYTD   | QHS    | 0.2794358 | 15 No |
| PEP-A  | TOFA   | 0.279065  | 8 No  |
| DHA    | SP     | 0.2789434 | 10 No |

|        |        |           |       |
|--------|--------|-----------|-------|
| AL     | TOFA   | 0.2785924 | 12 No |
| AQ     | CUR    | 0.2776777 | 20 No |
| C-MIR  | IB     | 0.2765583 | 15 No |
| CUR    | ROT    | 0.2761144 | 11 No |
| CQ     | CYC    | 0.2742999 | 8 No  |
| DNTA   | QHS    | 0.2739735 | 10 No |
| E-PPMP | MZB    | 0.2714092 | 15 No |
| MZB    | TCPA   | 0.2708672 | 16 No |
| ROT    | T-PPMP | 0.270186  | 15 No |
| ALLO   | DIA    | 0.2698615 | 25 No |
| PIP    | SF     | 0.2689943 | 17 No |
| BZD    | TOFA   | 0.268917  | 20 No |
| CUR    | TLM    | 0.2686928 | 23 No |
| BZD    | TRI    | 0.268567  | 12 No |
| PHEN   | SF     | 0.2676246 | 31 No |
| CYTD   | MZB    | 0.2675504 | 15 No |
| DAN    | TRI    | 0.2662195 | 20 No |
| AS     | CUR    | 0.2653034 | 17 No |
| SP     | VER    | 0.264129  | 10 No |
| FADE   | ROT    | 0.2631496 | 20 No |
| CYTD   | MFQ    | 0.2625895 | 21 No |
| ALLO   | SDZ    | 0.2623142 | 16 No |
| AQ     | TTFA   | 0.2621077 | 17 No |
| BZD    | SP     | 0.2619448 | 22 No |
| E-PPMP | VER    | 0.2606948 | 17 No |
| E-PPMP | QHS    | 0.258294  | 16 No |
| DIA    | TSA    | 0.2550148 | 35 No |
| CYC    | CYTD   | 0.2547115 | 24 No |
| CYC    | SDZ    | 0.2541488 | 30 No |
| C-MIR  | CYC    | 0.2526423 | 17 No |
| AM     | CYC    | 0.2516486 | 16 No |
| ATQ    | EHNA   | 0.251579  | 36 No |
| MZB    | TRI    | 0.2508144 | 24 No |
| TCPA   | VER    | 0.249753  | 20 No |
| MTX    | PHEN   | 0.2494655 | 35 No |
| DNTA   | TSA    | 0.2475383 | 30 No |
| LUMF   | MZB    | 0.2470091 | 27 No |
| PQ     | SP     | 0.2466153 | 15 No |
| DNTA   | PIP    | 0.2461664 | 20 No |
| PHEN   | VER    | 0.2456258 | 43 No |
| BZD    | DIA    | 0.2443923 | 49 No |
| MFQ    | SF     | 0.244021  | 38 No |
| CRL    | ROT    | 0.2436297 | 28 No |
| CYTD   | DHA    | 0.2435306 | 28 No |
| CG     | PHEN   | 0.2417127 | 60 No |
| EHNA   | PIP    | 0.2390167 | 39 No |
| IB     | MFQ    | 0.2370944 | 40 No |
| IB     | TOFA   | 0.2361789 | 34 No |

|        |        |           |        |
|--------|--------|-----------|--------|
| AQ     | T-PPMP | 0.2357285 | 40 No  |
| FADE   | TCPA   | 0.2354562 | 34 No  |
| DIA    | VER    | 0.2351944 | 46 No  |
| DHA    | PHEN   | 0.2348118 | 52 No  |
| MZB    | TOFA   | 0.234327  | 47 No  |
| MFQ    | TTFA   | 0.234284  | 34 No  |
| ALLO   | TOFA   | 0.2331301 | 45 No  |
| T-MIR  | VER    | 0.2330185 | 39 No  |
| DNTA   | TTFA   | 0.232867  | 36 No  |
| ALLO   | AQ     | 0.2327913 | 33 No  |
| BZD    | LUMF   | 0.2321861 | 41 No  |
| E-PPMP | PEP-A  | 0.2321816 | 47 No  |
| PIP    | T-PPMP | 0.2316635 | 45 No  |
| AM     | CYTD   | 0.2315293 | 30 No  |
| MZB    | PIP    | 0.2314589 | 35 No  |
| IB     | T-MIR  | 0.2309169 | 30 No  |
| DAN    | TOFA   | 0.230705  | 44 No  |
| DNTA   | TLM    | 0.2275821 | 54 No  |
| E-64   | PIP    | 0.2259837 | 51 No  |
| T-PPMP | TCPA   | 0.2243351 | 37 No  |
| CYTD   | PQ     | 0.2234455 | 44 No  |
| DNTA   | MFQ    | 0.2228988 | 40 No  |
| ROT    | TTFA   | 0.222241  | 38 No  |
| E-PPMP | MFQ    | 0.2206683 | 47 No  |
| DIA    | GYLP   | 0.2194063 | 120 No |
| PEP-A  | SDZ    | 0.2190352 | 42 No  |
| T-PPMP | TRI    | 0.2188767 | 55 No  |
| CQ     | T-MIR  | 0.2172261 | 54 No  |
| AM     | PEP-A  | 0.2160795 | 55 No  |
| DNTA   | FADE   | 0.2155085 | 52 No  |
| DNTA   | SF     | 0.2153968 | 58 No  |
| EHNA   | MTX    | 0.2153461 | 73 No  |
| AL     | SF     | 0.2149979 | 56 No  |
| CUR    | PIP    | 0.2143305 | 48 No  |
| AS     | TSA    | 0.2129012 | 47 No  |
| AL     | CQ     | 0.2091231 | 52 No  |
| MFQ    | TOFA   | 0.2074844 | 64 No  |
| DIA    | TCPA   | 0.2074497 | 86 No  |
| AM     | IB     | 0.2070461 | 62 No  |
| ALLO   | T-MIR  | 0.2051491 | 89 No  |
| SF     | T-PPMP | 0.2021929 | 68 No  |
| AL     | SDZ    | 0.2021306 | 63 No  |
| MFQ    | ROT    | 0.201332  | 70 No  |
| CQ     | SDZ    | 0.2003122 | 66 No  |
| SP     | T-PPMP | 0.1999289 | 65 No  |
| CYC    | ROT    | 0.1997787 | 67 No  |
| ALLO   | CYTD   | 0.1993925 | 66 No  |
| CQ     | LUMF   | 0.199302  | 74 No  |

|      |        |           |        |
|------|--------|-----------|--------|
| GYLP | T-PPMP | 0.1984993 | 110 No |
| AL   | BZD    | 0.1981024 | 76 No  |
| AS   | PQ     | 0.1976027 | 70 No  |
| E-64 | TCPA   | 0.1963877 | 74 No  |
| BZD  | T-PPMP | 0.1959693 | 95 No  |
| AL   | E-64   | 0.1959259 | 76 No  |
| CQ   | TOFA   | 0.1955735 | 91 No  |
| TCPA | TSA    | 0.1949231 | 94 No  |
| CUR  | DAN    | 0.1926862 | 97 No  |
| MZB  | ROT    | 0.1923711 | 89 No  |
| DIA  | FADE   | 0.1923025 | 115 No |
| BZD  | PHEN   | 0.1899221 | 104 No |
| CYC  | TRI    | 0.1895336 | 93 No  |
| ROT  | VER    | 0.1890297 | 86 No  |
| AM   | SDZ    | 0.1880277 | 95 No  |
| PHEN | T-PPMP | 0.1873926 | 126 No |
| AS   | CRL    | 0.1870733 | 104 No |
| CYC  | TOFA   | 0.1864499 | 103 No |
| AS   | TTFA   | 0.186199  | 88 No  |
| CQ   | E-PPMP | 0.1855209 | 114 No |
| AM   | PQ     | 0.1853443 | 89 No  |
| ROT  | TSA    | 0.1817833 | 106 No |
| QHS  | SDZ    | 0.1804179 | 114 No |
| AM   | E-64   | 0.1786257 | 112 No |
| GYLP | TCPA   | 0.1785939 | 160 No |
| AS   | FADE   | 0.1782982 | 107 No |
| SP   | TLM    | 0.1781312 | 139 No |
| MTX  | TCPA   | 0.1773949 | 100 No |
| CQ   | CYTD   | 0.1759108 | 110 No |
| CUR  | IB     | 0.1745267 | 102 No |
| AS   | CYC    | 0.1726523 | 130 No |
| AS   | DAN    | 0.1713557 | 137 No |
| AS   | E-64   | 0.1694577 | 128 No |
| MZB  | SP     | 0.1655497 | 141 No |
| CYC  | MFQ    | 0.1648375 | 153 No |
| CYC  | DNTA   | 0.164412  | 141 No |
| AM   | TSA    | 0.163599  | 147 No |
| DIA  | TTFA   | 0.1633233 | 186 No |
| CQ   | T-PPMP | 0.1628301 | 158 No |
| AQ   | TLM    | 0.1606334 | 195 No |
| PHEN | PQ     | 0.1582341 | 182 No |
| PHEN | SDZ    | 0.1579396 | 209 No |
| IB   | SP     | 0.1577809 | 164 No |
| CQ   | ROT    | 0.156259  | 186 No |
| ALLO | AM     | 0.1545393 | 177 No |
| GYLP | TSA    | 0.1544548 | 199 No |
| ALLO | DNTA   | 0.1541024 | 160 No |
| CUR  | MFQ    | 0.1536202 | 155 No |



|        |        |           |        |
|--------|--------|-----------|--------|
| AL     | CYC    | 0.1531513 | 157 No |
| C-MIR  | EHNA   | 0.153075  | 207 No |
| ALLO   | CUR    | 0.1528125 | 175 No |
| AS     | SF     | 0.1518084 | 174 No |
| AL     | PEP-A  | 0.1516495 | 165 No |
| BZD    | TCPA   | 0.151008  | 186 No |
| AS     | DHA    | 0.150341  | 179 No |
| GYLP   | QHS    | 0.1494477 | 228 No |
| IB     | ROT    | 0.1484451 | 183 No |
| IB     | SDZ    | 0.1471888 | 209 No |
| AS     | QHS    | 0.1462778 | 207 No |
| ALLO   | AS     | 0.1454841 | 189 No |
| C-MIR  | DIA    | 0.145038  | 250 No |
| ATQ    | DIA    | 0.1450015 | 230 No |
| CYTD   | PYR    | 0.1448865 | 187 No |
| GYLP   | VER    | 0.1443123 | 234 No |
| CYC    | DIA    | 0.1441266 | 187 No |
| AM     | FADE   | 0.1438347 | 208 No |
| DAN    | ROT    | 0.1413553 | 190 No |
| AM     | BZD    | 0.1404829 | 232 No |
| AS     | VER    | 0.1403471 | 206 No |
| AL     | FADE   | 0.1397479 | 208 No |
| DNTA   | IB     | 0.1391856 | 187 No |
| MZB    | T-MIR  | 0.1389792 | 207 No |
| E-PPMP | IB     | 0.1369919 | 229 No |
| AS     | T-PPMP | 0.1354351 | 244 No |
| IB     | TCPA   | 0.1350723 | 224 No |
| AS     | BZD    | 0.133463  | 267 No |
| DIA    | TRI    | 0.1306757 | 247 No |
| ALLO   | E-PPMP | 0.1280488 | 248 No |
| DAN    | GYLP   | 0.1263443 | 302 No |
| AM     | TTFA   | 0.1258709 | 283 No |
| ALLO   | TRI    | 0.1251814 | 286 No |
| AM     | CRL    | 0.1241444 | 278 No |
| IB     | TRI    | 0.1226859 | 264 No |
| EHNA   | SDZ    | 0.1222889 | 329 No |
| CUR    | CYC    | 0.1218729 | 265 No |
| GYLP   | MFQ    | 0.1214853 | 338 No |
| AQ     | EHNA   | 0.1179774 | 338 No |
| AL     | PQ     | 0.1176504 | 278 No |
| AL     | IB     | 0.1173561 | 306 No |
| CG     | EHNA   | 0.1150576 | 374 No |
| CYC    | SP     | 0.1134266 | 288 No |
| CQ     | DNTA   | 0.1115861 | 320 No |
| AL     | DAN    | 0.1105258 | 333 No |
| FADE   | MFQ    | 0.1104979 | 327 No |
| CG     | GYLP   | 0.1092232 | 425 No |
| DAN    | E-PPMP | 0.1090911 | 332 No |

|        |        |           |        |
|--------|--------|-----------|--------|
| EHNA   | LUMF   | 0.1090203 | 355 No |
| PHEN   | QHS    | 0.1089238 | 361 No |
| CYTD   | PHEN   | 0.1076635 | 351 No |
| AL     | TTFA   | 0.106935  | 376 No |
| CYC    | GYLP   | 0.1054142 | 390 No |
| AL     | CUR    | 0.1049018 | 358 No |
| DHA    | MFQ    | 0.1038922 | 367 No |
| CYTD   | EHNA   | 0.1016893 | 429 No |
| EHNA   | T-PPMP | 0.1009894 | 415 No |
| CG     | TCPA   | 0.0979984 | 409 No |
| ALLO   | GYLP   | 0.097759  | 425 No |
| DIA    | PQ     | 0.0969906 | 416 No |
| AL     | TLM    | 0.0966328 | 433 No |
| AS     | PEP-A  | 0.0955403 | 386 No |
| MFQ    | TSA    | 0.095102  | 385 No |
| DIA    | QHS    | 0.0939125 | 427 No |
| DHA    | GYLP   | 0.0903228 | 452 No |
| CRL    | GYLP   | 0.089461  | 486 No |
| GYLP   | PIP    | 0.0866486 | 498 No |
| EHNA   | TRI    | 0.0860475 | 479 No |
| DHA    | TCPA   | 0.0855086 | 429 No |
| DIA    | T-MIR  | 0.0851964 | 456 No |
| AS     | DIA    | 0.0833197 | 505 No |
| AM     | VER    | 0.0813126 | 497 No |
| PEP-A  | PHEN   | 0.0806506 | 512 No |
| GYLP   | TTFA   | 0.0803191 | 537 No |
| MFQ    | T-PPMP | 0.0794537 | 494 No |
| AM     | TLM    | 0.0787508 | 516 No |
| DIA    | PIP    | 0.078124  | 530 No |
| CRL    | MFQ    | 0.0748498 | 494 No |
| PQ     | TCPA   | 0.0746617 | 503 No |
| EHNA   | T-MIR  | 0.0734319 | 522 No |
| AS     | IB     | 0.0723017 | 511 No |
| E-PPMP | PHEN   | 0.0710597 | 549 No |
| EHNA   | PYR    | 0.0695827 | 561 No |
| AM     | T-PPMP | 0.0686205 | 562 No |
| AL     | TSA    | 0.0655958 | 548 No |
| PEP-A  | TCPA   | 0.0624435 | 574 No |
| SF     | TCPA   | 0.0618116 | 546 No |
| AS     | TLM    | 0.0612375 | 617 No |
| CQ     | DIA    | 0.0603881 | 601 No |
| DIA    | SF     | 0.0563788 | 637 No |
| MFQ    | VER    | 0.0561587 | 633 No |
| DIA    | SP     | 0.055668  | 628 No |
| DAN    | SDZ    | 0.0552108 | 652 No |
| AL     | CRL    | 0.0522507 | 673 No |
| CG     | CQ     | 0.051708  | 681 No |
| GYLP   | IB     | 0.0511657 | 667 No |

|        |        |           |        |
|--------|--------|-----------|--------|
| DAN    | TCPA   | 0.0504522 | 651 No |
| AS     | CQ     | 0.0503084 | 685 No |
| ATQ    | PYR    | 0.0498645 | 689 No |
| C-MIR  | PYR    | 0.0470867 | 668 No |
| CUR    | PHEN   | 0.0443666 | 711 No |
| EHNA   | SP     | 0.0435661 | 744 No |
| CQ     | PHEN   | 0.0435136 | 709 No |
| CG     | DIA    | 0.0435103 | 759 No |
| C-MIR  | T-PPMP | 0.0389907 | 709 No |
| GYLP   | PEP-A  | 0.0385243 | 774 No |
| AM     | CUR    | 0.0375228 | 754 No |
| FADE   | GYLP   | 0.0366829 | 769 No |
| PYR    | T-MIR  | 0.0360434 | 749 No |
| CG     | T-PPMP | 0.0357896 | 783 No |
| EHNA   | GYLP   | 0.0345312 | 797 No |
| AL     | VER    | 0.0330514 | 785 No |
| AS     | MZB    | 0.0307703 | 782 No |
| E-64   | GYLP   | 0.0271452 | 816 No |
| ALLO   | SP     | 0.0259374 | 819 No |
| PYR    | VER    | 0.0258809 | 829 No |
| DAN    | DNTA   | 0.0223811 | 847 No |
| CUR    | EHNA   | 0.0217306 | 863 No |
| GYLP   | MZB    | 0.0195518 | 884 No |
| C-MIR  | PHEN   | 0.0187793 | 872 No |
| CQ     | GYLP   | 0.0168083 | 894 No |
| QHS    | TCPA   | 0.0161928 | 890 No |
| MFQ    | TLM    | 0.0156883 | 899 No |
| PYR    | SDZ    | 0.0150403 | 903 No |
| GYLP   | LUMF   | 0.0149692 | 906 No |
| GYLP   | TRI    | 0.0141311 | 905 No |
| CQ     | PYR    | 0.0128989 | 919 No |
| ALLO   | AL     | 0.0127372 | 913 No |
| E-PPMP | GYLP   | 0.0124759 | 937 No |
| DIA    | EHNA   | 0.0122126 | 914 No |
| GYLP   | MTX    | 0.0117312 | 924 No |
| GYLP   | TOFA   | 0.0110483 | 926 No |
| PYR    | TOFA   | 0.0106143 | 932 No |
| AM     | EHNA   | 0.0095705 | 938 No |
| DIA    | PEP-A  | 0.0061974 | 965 No |
| CG     | TSA    | 0.003202  | 971 No |
| AQ     | PYR    | 0.0031391 | 981 No |
| DAN    | PHEN   | 0.0028337 | 984 No |
| AM     | MZB    | 0.0015808 | 992 No |
| PYR    | TSA    | 0.0013099 | 988 No |
| PIP    | TCPA   | 0.0011743 | 991 No |
| IB     | PYR    | 0.001084  | 992 No |
| PIP    | PYR    | -0.0014   | 988 No |
| CUR    | PYR    | -0.003038 | 986 No |

|        |        |           |        |
|--------|--------|-----------|--------|
| GYLP   | SP     | -0.003062 | 979 No |
| E-PPMP | EHNA   | -0.004112 | 976 No |
| T-MIR  | T-PPMP | -0.005477 | 964 No |
| CYTD   | TCPA   | -0.006945 | 939 No |
| PHEN   | TRI    | -0.00721  | 947 No |
| ALLO   | CG     | -0.01146  | 934 No |
| AM     | GYLP   | -0.011814 | 931 No |
| DNTA   | TCPA   | -0.011891 | 922 No |
| AS     | EHNA   | -0.016849 | 873 No |
| ATQ    | PHEN   | -0.017136 | 877 No |
| AM     | CQ     | -0.01893  | 865 No |
| CYTD   | GYLP   | -0.019355 | 880 No |
| ALLO   | MFQ    | -0.020166 | 844 No |
| AL     | MZB    | -0.023837 | 822 No |
| CG     | DAN    | -0.024198 | 826 No |
| EHNA   | ROT    | -0.025703 | 828 No |
| E-64   | MFQ    | -0.026447 | 807 No |
| AS     | GYLP   | -0.027021 | 830 No |
| GYLP   | PQ     | -0.027083 | 822 No |
| DAN    | PYR    | -0.030804 | 765 No |
| MZB    | PYR    | -0.030827 | 778 No |
| DNTA   | GYLP   | -0.031222 | 801 No |
| AL     | EHNA   | -0.031564 | 804 No |
| CYC    | PYR    | -0.03252  | 769 No |
| EHNA   | MFQ    | -0.033198 | 808 No |
| CG     | IB     | -0.036515 | 775 No |
| ATQ    | GYLP   | -0.041028 | 742 No |
| AQ     | GYLP   | -0.041317 | 757 No |
| ALLO   | MTX    | -0.042299 | 691 No |
| MFQ    | SDZ    | -0.042449 | 728 No |
| LUMF   | PHEN   | -0.043126 | 712 No |
| DAN    | MTX    | -0.043282 | 699 No |
| MFQ    | MZB    | -0.045426 | 670 No |
| BZD    | MFQ    | -0.045608 | 690 No |
| FADE   | PYR    | -0.04589  | 674 No |
| AL     | DIA    | -0.046363 | 711 No |
| SDZ    | TCPA   | -0.049509 | 655 No |
| PHEN   | PYR    | -0.049765 | 665 No |
| DIA    | IB     | -0.050381 | 693 No |
| CRL    | PYR    | -0.051149 | 670 No |
| CYC    | MTX    | -0.051886 | 653 No |
| GYLP   | T-MIR  | -0.052345 | 665 No |
| ATQ    | TCPA   | -0.054336 | 627 No |
| CG     | VER    | -0.055167 | 641 No |
| ALLO   | PYR    | -0.05935  | 594 No |
| MTX    | TSA    | -0.063157 | 577 No |
| GYLP   | SF     | -0.063332 | 593 No |
| PHEN   | PIP    | -0.063514 | 602 No |

|        |        |           |        |
|--------|--------|-----------|--------|
| PHEN   | T-MIR  | -0.064789 | 575 No |
| DNTA   | PHEN   | -0.068916 | 568 No |
| CG     | CYC    | -0.069566 | 579 No |
| CRL    | CG     | -0.070553 | 551 No |
| GYLP   | PYR    | -0.07109  | 577 No |
| DIA    | PYR    | -0.071125 | 519 No |
| ROT    | TCPA   | -0.07114  | 534 No |
| BZD    | PYR    | -0.07384  | 513 No |
| GYLP   | ROT    | -0.075458 | 539 No |
| C-MIR  | GYLP   | -0.076821 | 521 No |
| DNTA   | EHNA   | -0.078544 | 499 No |
| PYR    | TCPA   | -0.079765 | 473 No |
| MFQ    | PYR    | -0.079973 | 490 No |
| IB     | PHEN   | -0.082461 | 507 No |
| CQ     | MTX    | -0.082488 | 458 No |
| EHNA   | TOFA   | -0.082915 | 513 No |
| BZD    | GYLP   | -0.084266 | 517 No |
| LUMF   | TCPA   | -0.086247 | 441 No |
| PEP-A  | PYR    | -0.08645  | 445 No |
| AS     | PYR    | -0.087105 | 441 No |
| PYR    | T-PPMP | -0.087252 | 436 No |
| CG     | MZB    | -0.087833 | 482 No |
| PHEN   | TOFA   | -0.09118  | 468 No |
| AL     | T-PPMP | -0.092944 | 424 No |
| E-PPMP | PYR    | -0.09379  | 383 No |
| CQ     | TCPA   | -0.095488 | 377 No |
| CRL    | MTX    | -0.109201 | 324 No |
| LUMF   | PYR    | -0.111778 | 342 No |
| GYLP   | SDZ    | -0.112593 | 374 No |
| AM     | PYR    | -0.114544 | 326 No |
| CUR    | GYLP   | -0.124429 | 311 No |
| MTX    | VER    | -0.126424 | 269 No |
| MTX    | T-PPMP | -0.128423 | 274 No |
| CG     | CYTD   | -0.130491 | 273 No |
| MFQ    | PHEN   | -0.132875 | 283 No |
| MTX    | PIP    | -0.132916 | 242 No |
| IB     | MTX    | -0.135592 | 231 No |
| AQ     | PHEN   | -0.13605  | 247 No |
| CG     | PIP    | -0.139675 | 248 No |
| PYR    | TTFA   | -0.144548 | 196 No |
| DIA    | MTX    | -0.146242 | 232 No |
| DIA    | LUMF   | -0.148448 | 240 No |
| AL     | GYLP   | -0.150809 | 228 No |
| AQ     | TCPA   | -0.151061 | 184 No |
| BZD    | CG     | -0.157968 | 190 No |
| AS     | TCPA   | -0.15952  | 166 No |
| PHEN   | SP     | -0.162527 | 178 No |
| CG     | PEP-A  | -0.162543 | 187 No |

|        |       |           |        |
|--------|-------|-----------|--------|
| PYR    | QHS   | -0.163825 | 144 No |
| AQ     | DIA   | -0.164906 | 170 No |
| AL     | PHEN  | -0.17252  | 151 No |
| CG     | FADE  | -0.175246 | 146 No |
| C-MIR  | TCPA  | -0.175339 | 117 No |
| MTX    | MZB   | -0.176537 | 122 No |
| CG     | TLM   | -0.18081  | 178 No |
| T-MIR  | TCPA  | -0.184824 | 98 No  |
| AM     | TCPA  | -0.188121 | 105 No |
| AQ     | MTX   | -0.188258 | 91 No  |
| CG     | TOFA  | -0.190765 | 110 No |
| FADE   | MTX   | -0.192311 | 93 No  |
| MTX    | TTFA  | -0.193838 | 91 No  |
| DHA    | PYR   | -0.201485 | 67 No  |
| CUR    | TCPA  | -0.206584 | 72 No  |
| PQ     | PYR   | -0.207601 | 62 No  |
| MTX    | MFQ   | -0.20883  | 64 No  |
| E-PPMP | TCPA  | -0.208853 | 59 No  |
| MFQ    | TCPA  | -0.20893  | 64 No  |
| DNTA   | PYR   | -0.209185 | 55 No  |
| ATQ    | MTX   | -0.210288 | 62 No  |
| AM     | DIA   | -0.210822 | 85 No  |
| AL     | PYR   | -0.213337 | 50 No  |
| PYR    | SF    | -0.215403 | 48 No  |
| CG     | TTFA  | -0.216944 | 63 No  |
| DAN    | DIA   | -0.219502 | 61 No  |
| CG     | SF    | -0.219584 | 66 No  |
| PYR    | TLM   | -0.225615 | 53 No  |
| E-64   | PYR   | -0.228999 | 42 No  |
| ATQ    | CG    | -0.230045 | 44 No  |
| MTX    | TLM   | -0.231933 | 69 No  |
| CG     | CUR   | -0.232794 | 64 No  |
| SP     | TCPA  | -0.236587 | 40 No  |
| CG     | PQ    | -0.245847 | 45 No  |
| CG     | E-64  | -0.246669 | 39 No  |
| CG     | QHS   | -0.273569 | 21 No  |
| CG     | DHA   | -0.278317 | 20 No  |
| MTX    | SF    | -0.279113 | 9 No   |
| BZD    | MTX   | -0.279268 | 11 No  |
| DIA    | MFQ   | -0.288377 | 17 No  |
| AM     | MTX   | -0.296738 | 10 No  |
| AM     | PHEN  | -0.299631 | 9 No   |
| MTX    | PEP-A | -0.301718 | 9 No   |
| CG     | MFQ   | -0.305753 | 14 No  |
| CUR    | MTX   | -0.3074   | 6 No   |
| MTX    | QHS   | -0.307608 | 4 No   |
| CYTD   | MTX   | -0.311252 | 4 No   |
| AQ     | CG    | -0.313906 | 6 No   |

|        |        |           |       |
|--------|--------|-----------|-------|
| AS     | PHEN   | -0.315244 | 11 No |
| AL     | TCPA   | -0.317493 | 5 No  |
| PYR    | TRI    | -0.321964 | 2 No  |
| CG     | E-PPMP | -0.325419 | 4 No  |
| AS     | MTX    | -0.331135 | 2 No  |
| PYR    | ROT    | -0.334086 | 2 No  |
| LUMF   | MTX    | -0.335144 | 2 No  |
| E-64   | MTX    | -0.338972 | 5 No  |
| C-MIR  | CG     | -0.341183 | 6 No  |
| AS     | CG     | -0.345683 | 2 No  |
| MTX    | PQ     | -0.349541 | 0 No  |
| DHA    | MTX    | -0.370991 | 0 No  |
| CG     | LUMF   | -0.373162 | 3 No  |
| C-MIR  | MTX    | -0.382827 | 1 No  |
| MTX    | TOFA   | -0.385662 | 0 No  |
| CG     | T-MIR  | -0.387549 | 0 No  |
| AM     | CG     | -0.406848 | 1 No  |
| CG     | DNTA   | -0.407833 | 0 No  |
| MTX    | TRI    | -0.412493 | 0 No  |
| AL     | MTX    | -0.433124 | 0 No  |
| CG     | TRI    | -0.444277 | 0 No  |
| AL     | CG     | -0.450121 | 0 No  |
| CG     | ROT    | -0.478111 | 0 No  |
| MTX    | T-MIR  | -0.482207 | 0 No  |
| E-PPMP | MTX    | -0.508788 | 0 No  |
| DNTA   | MTX    | -0.554702 | 0 No  |
| MTX    | ROT    | -0.572487 | 0 No  |

**TABLE S6:**

| <b>Gene ID/Mutant</b> | <b>ATQ</b> | <b>ROT</b> | <b>LUMF</b> | <b>AL</b> |
|-----------------------|------------|------------|-------------|-----------|
| PF3D7_1013500         | 0.02833    | 1.329      | 0.11        | 0.79      |
| PF3D7_1126100         | 0.05725    | 0.047      | 0.15        | 0.46      |
| PF3D7_1327100         | 0.11932    | 0.175      | 0.05        | 0.69      |
| PF3D7_1226900         | 0.18584    | 0.442      | 0.72        | 0.9       |
| PF3D7_1441800         | 0.27144    | 0.21       | 0.44        | 1.03      |
| PF3D7_1107900         | 0.28667    | 0.018      | 0.23        | 0.5       |
| PF3D7_0727100         | 0.28756    | 0.114      | 0.63        | 1.92      |
| PF3D7_1001600         | 0.3791     | 0.51       | 0.63        | 1.2       |
| PF3D7_0902200         | 0.45218    | 0.063      | 0.49        | 0.73      |
| PF3D7_1019400         | 0.48074    | 2.64       | 0.39        | 1.91      |
| PF3D7_0812500         | 0.51611    | 9.8        | 3.01        | 1.09      |
| PF3D7_1143500         | 0.51954    | 0.08       | 0.22        | 1.32      |
| PF3D7_1216100         | 0.71458    | 0.68       | 0.79        | 0.45      |
| PF3D7_1433400         | 0.73       | 0.957      | 1.14        | 2.44      |
| PF3D7_1219300         | 0.74293    | 3.7        | 0.82        | 1.34      |
| PF3D7_1207800         | 0.74775    | 1.08       | 0.88        | 2.38      |
| PF3D7_0402000         | 0.76333    | 3.266      | 0.94        | 2.43      |
| PF3D7_1133700         | 0.85212    | 13.75      | 4.84        | 0.92      |
| PF3D7_1475600         | 0.92029    | 0.653      | 34.6        | 0.53      |
| PF3D7_1103100         | 0.94474    | 1.6        | 4           | 1.38      |
| PF3D7_0322000         | 1.04       | 6.764      | 1.38        | 0.91      |
| PF3D7_0916700         | 1.13833    | 1.267      | 0.78        | 1.79      |
| PF3D7_1343000         | 1.32566    | 0.113      | 1.35        | 0.82      |
| PF3D7_1136000         | 1.52049    | 0.62       | 9.3         | 1.3       |
| PF3D7_1001900         | 1.62667    | 1.955      | 2.98        | 2.25      |
| PF3D7_0511500         | 1.67194    | 1.28       | 0.11        | 5         |
| PF3D7_0103300         | 1.80833    | 191.8      | 3.34        | 3.65      |
| PF3D7_1330500         | 1.92931    | 0.271      | 2.2         | 0.79      |
| PF3D7_0702300         | 2.10833    | 6.139      | 2.6         | 1.68      |
| PF3D7_0203600         | 2.40405    | 33.82      | 20.7        | 2.5       |
| PF3D7_1343900         | 3.03323    | 1.217      | 0.76        | 0.8       |
| PF3D7_0211100         | 3.08333    | 0.301      | 1.25        | 0.81      |
| PF3D7_1432400         | 3.29082    | 1.488      | 3.16        | 0.7       |



|               |         |       |      |      |
|---------------|---------|-------|------|------|
| PF3D7_0404600 | 3.51087 | 6.937 | 0.67 | 1.13 |
| PF3D7_0203700 | 3.63561 | 0.057 | 1.79 | 0.84 |
| PF3D7_0521900 | 3.76835 | 12.8  | 4.6  | 1.57 |
| PF3D7_0931000 | 4.10741 | 6.22  | 20.6 | 1.6  |
| PF3D7_0614500 | 4.11894 | 0.359 | 2.16 | 1.19 |
| PF3D7_1138900 | 4.74844 | 10.99 | 16   | 1.66 |
| PF3D7_0619900 | 4.90408 | 3.7   | 0.44 | 1.14 |
| PF3D7_1444100 | 5.20928 | 11.51 | 21.3 | 2.1  |
| PF3D7_0601700 | 5.74296 | 0.102 | 2.05 | 1.28 |
| PF3D7_1035800 | 7.02833 | 24.88 | 12.5 | 1.5  |
| PF3D7_1302000 | 9.18243 | 0.155 | 2.4  | 0.6  |
| PF3D7_1311900 | 13.3487 | 8.8   | 34.6 | 1.82 |

Legends to Table:

Table S6: A rank comparison of fold change from wild type GI<sub>50</sub> values in presence of mitochondrial inhibitors (ATQ, ROT) with non mitochondrial inhibitors AL. A Spearman correlation of the chemo-genetic values (RPR) between the drug groups ATQ-LUMF shows positive correlation (0.53) whereas AL-LUMF was negative (0.1) indicating LUMF might also act on mitochondrial targets.

**Table S7 : P. falciparum gene clusters of drug responses. (The clusters are defined with Ward's minimum variance criterion, the number of clusters are determined by using maximum Cubic Clustering Criteria while increasing the cluster number)**

| Cluster                      | PB ID | PlasmoDB ID   | Genomic Location                       | Annotation                                                      | GO Annotations                                                                        |
|------------------------------|-------|---------------|----------------------------------------|-----------------------------------------------------------------|---------------------------------------------------------------------------------------|
| <b>cluster_DNR</b>           |       |               |                                        |                                                                 |                                                                                       |
|                              | PB-11 | PF3D7_0416500 | PF3D7_04_v3: 723,073 - 724,242 (-)     | repressor of RNA polymerase III transcription MAF1, putative    | null                                                                                  |
|                              | PB-12 | PF3D7_1018400 | PF3D7_10_v3: 734,722 - 735,738 (+)     | conserved Plasmodium protein, unknown function                  | null                                                                                  |
|                              | PB-13 | PF3D7_1360200 | PF3D7_13_v3: 2,406,838 - 2,408,385 (-) | conserved protein, unknown function                             | null                                                                                  |
|                              | PB-15 | PF3D7_0611800 | PF3D7_06_v3: 490,858 - 501,140 (-)     | conserved Plasmodium protein, unknown function                  | null                                                                                  |
|                              | PB-17 | PF3D7_0521900 | PF3D7_05_v3: 888,657 - 895,144 (+)     | conserved Plasmodium protein, unknown function                  | ATP binding, actin binding, calmodulin binding, motor activity                        |
|                              | PB-18 | PF3D7_1219300 | PF3D7_12_v3: 766,654 - 774,197 (-)     | erythrocyte membrane protein 1, PFEMP1 (VAR)                    | cell adhesion molecule binding, host cell surface receptor binding, receptor activity |
|                              | PB-3  | PF3D7_0615900 | PF3D7_06_v3: 662,435 - 667,855 (-)     | conserved Plasmodium protein, unknown function                  | catalytic activity                                                                    |
| <b>cluster_TRI</b>           |       |               |                                        |                                                                 |                                                                                       |
|                              | PB-4  | PF3D7_1122900 | PF3D7_11_v3: 878,969 - 895,273 (+)     | dynein heavy chain, putative                                    | ATP binding, ATPase activity, microtubule motor activity, motor activity              |
|                              | PB-5  | PF3D7_1141900 | PF3D7_11_v3: 1,676,255 - 1,677,769 (-) | inner membrane complex protein 1b, putative (IMC1b)             | structural constituent of cytoskeleton                                                |
| <b>cluster_CYTD</b>          |       |               |                                        |                                                                 |                                                                                       |
|                              | PB-19 | PF3D7_1133700 | PF3D7_11_v3: 1,302,173 - 1,305,987 (+) | conserved Plasmodium protein, unknown function                  | null                                                                                  |
|                              | PB-21 | PF3D7_1136000 | PF3D7_11_v3: 1,403,906 - 1,414,512 (+) | conserved Plasmodium protein, unknown function                  | actin binding, calmodulin binding, motor activity, nucleotide binding                 |
|                              | PB-39 | PF3D7_1103100 | PF3D7_11_v3: 140,048 - 140,801 (-)     | 60S acidic ribosomal protein P1, putative                       | structural constituent of ribosome                                                    |
|                              | PB-42 | PF3D7_1216100 | PF3D7_12_v3: 646,979 - 647,860 (+)     | conserved Plasmodium membrane protein, unknown function         | null                                                                                  |
|                              | PB-45 | PF3D7_1226900 | PF3D7_12_v3: 1,088,536 - 1,090,023 (-) | conserved Plasmodium protein, unknown function                  | ATP binding, lipote-protein ligase activity, transferase activity                     |
|                              | PB-64 | PF3D7_1107900 | PF3D7_11_v3: 343,913 - 349,351 (-)     | mechanosensitive ion channel protein                            | null                                                                                  |
|                              | PB-76 | PF3D7_1433400 | PF3D7_14_v3: 1,312,304 - 1,329,577 (-) | conserved Plasmodium membrane protein, unknown function         | protein binding, zinc ion binding                                                     |
|                              | PB-87 | PF3D7_0812500 | PF3D7_08_v3: 626,069 - 628,945 (-)     | RNA binding protein, putative                                   | nucleic acid binding                                                                  |
| <b>cluster_CUR</b>           |       |               |                                        |                                                                 |                                                                                       |
|                              | PB-71 | PF3D7_1001900 | PF3D7_10_v3: 99,379 - 100,361 (-)      | Plasmodium exported protein (hyp16), unknown function (PfJ23)   | null                                                                                  |
|                              | PB-77 | PF3D7_0322000 | PF3D7_03_v3: 928,644 - 929,159 (-)     | peptidyl-prolyl cis-trans isomerase (CYP19A)                    | cyclosporin A binding, peptidyl-prolyl cis-trans isomerase activity                   |
|                              | PB-78 | PF3D7_0623900 | PF3D7_06_v3: 977,183 - 978,049 (+)     | ribonuclease H2 subunit A, putative                             | RNA binding, ribonuclease H activity                                                  |
| <b>cluster_ART_FADE_PPMI</b> |       |               |                                        |                                                                 |                                                                                       |
|                              | PB-35 | PF3D7_1001600 | PF3D7_10_v3: 86,538 - 89,009 (-)       | alpha/beta hydrolase, putative                                  | null                                                                                  |
|                              | PB-54 | PF3D7_0902200 | PF3D7_09_v3: 98,175 - 100,339 (-)      | serine/threonine protein kinase, FIKK family (FIKK9.3)          | ATP binding, protein serine/threonine kinase activity                                 |
|                              | PB-50 | PF3D7_1138700 | PF3D7_11_v3: 1,525,654 - 1,531,744 (-) | conserved Plasmodium protein, unknown function                  | ATP binding, actin binding, calmodulin binding, motor activity                        |
|                              | PB-55 | PF3D7_0727100 | PF3D7_07_v3: 1,152,155 - 1,155,355 (-) | conserved Plasmodium protein, unknown function                  | extracellular matrix structural constituent                                           |
|                              | PB-52 | PF3D7_1136600 | PF3D7_11_v3: 1,441,503 - 1,445,471 (+) | conserved Plasmodium protein, unknown function                  | ATP binding, actin binding, motor activity                                            |
|                              | PB-57 | PF3D7_1126100 | PF3D7_11_v3: 1,018,366 - 1,022,495 (-) | autophagy-related protein 7, putative (ATG7)                    | catalytic activity                                                                    |
|                              | PB-58 | PF3D7_1343700 | PF3D7_13_v3: 1,724,817 - 1,726,997 (-) | kelch protein, putative                                         | protein binding, voltage-gated potassium channel activity                             |
| <b>cluster_ROT</b>           |       |               |                                        |                                                                 |                                                                                       |
|                              | PB-60 | PF3D7_1330500 | PF3D7_13_v3: 1,284,988 - 1,287,165 (+) | conserved Plasmodium protein, unknown function                  | null                                                                                  |
|                              | PB-65 | PF3D7_0606000 | PF3D7_06_v3: 250,612 - 253,803 (-)     | conserved Plasmodium protein, unknown function                  | null                                                                                  |
|                              | PB-66 | PF3D7_0614500 | PF3D7_06_v3: 606,142 - 607,259 (-)     | 60S ribosomal protein L19, putative                             | structural constituent of ribosome                                                    |
|                              | PB-68 | PF3D7_0601700 | PF3D7_06_v3: 70,948 - 71,935 (+)       | Plasmodium exported protein (PHISTa), unknown function, pseudog | nucleotide binding                                                                    |
|                              | PB-62 | PF3D7_1302000 | PF3D7_13_v3: 112,792 - 113,815 (-)     | Plasmodium exported protein, unknown function                   | null                                                                                  |
| <b>cluster_EHNA_TCPA</b>     |       |               |                                        |                                                                 |                                                                                       |
|                              | PB-22 | PF3D7_0931000 | PF3D7_09_v3: 1,248,866 - 1,251,601 (-) | elongation factor Tu, putative                                  | GTP binding, GTPase activity                                                          |
|                              | PB-23 | PF3D7_0830900 | PF3D7_08_v3: 1,317,600 - 1,318,341 (-) | Plasmodium exported protein, unknown function                   | null                                                                                  |
|                              | PB-28 | PF3D7_1138900 | PF3D7_11_v3: 1,540,804 - 1,544,163 (+) | unspecified product                                             | null                                                                                  |

TABLE S8. List of chemical inhibitors used to create chemogenomic profiles.

|       |                                                              |        |                                 |
|-------|--------------------------------------------------------------|--------|---------------------------------|
| ALLO  | allopurinol                                                  | LUMF   | lumifantrine                    |
| AQ    | amodiaquin                                                   | MTX    | methotrexate                    |
| AL    | artelinic acid                                               | MFQ    | mefloquine                      |
| AM    | artemether                                                   | MZB    | mizoribine                      |
| AS    | artesunate                                                   | T-MIR  | <i>trans</i> -mirincamycin      |
| ATQ   | atovaquone                                                   | PQ     | primaquine                      |
| BZD   | benzimidazole                                                | PEP-A  | pepstatin A                     |
| CG    | cycloguanil                                                  | PHEN   | phenethroline                   |
| C-MIR | <i>cis</i> -mirincamycin                                     | PIP    | piperazine                      |
| CRL   | cerulinin                                                    | E-PPMP | <i>erythro</i> -PPMP            |
| CQ    | chloroquine                                                  | PYR    | pyrimethamine                   |
| CUR   | curcumin                                                     | T-PPMP | <i>threo</i> -PPMP              |
| CYTD  | cytochalasin D                                               | QHS    | artemisinin (qinghaosu)         |
| CYC   | D-cycloserine                                                | ROT    | rotenone                        |
| DAN   | diazooxonorleucine                                           | SF     | sinefungin                      |
| DHA   | dihydroartemisinin                                           | SDZ    | sulfadiazine                    |
| DNR   | daunorubicin                                                 | SP     | sulfadoxine                     |
| DNTA  | dinitroaniline                                               | TCPA   | fenoxaprop                      |
| E-64  | <i>trans</i> -epoxysuccinyl-L-leucylamido(4-guanidino)butane | TOFA   | 5-(tetradecyloxy)-2-furoic acid |
| EHNA  | <i>erythro</i> -9-(2-hydroxy-3-nonyl)-adenine hydrochloride  | TSA    | triclostin A                    |
| FADE  | 2-fluoroadenosine                                            | TTFA   | thenoyltrifluoroacetone         |
| IB    | ibandronate                                                  | TLM    | thiolactomycin                  |
|       |                                                              | TRI    | triclosan                       |
|       |                                                              | VER    | verapamil                       |

Table S9: Genes directly connected to K13-propeller in the co-expression network that contains SNPs associated with parasite clearance half-life<sup>1</sup>.

| Chr. | Position | P value  | FDR corrected P value | Gene ID       | Gene Description                                        | GO Biological Process                                                    |
|------|----------|----------|-----------------------|---------------|---------------------------------------------------------|--------------------------------------------------------------------------|
| 5    | 261651   | 3.73E-05 | 0.01035               | PF3D7_0506300 | conserved Plasmodium protein, unknown function          | transferase activity                                                     |
| 5    | 852479   | 7.56E-06 | 0.00295               | PF3D7_0520800 | conserved Plasmodium protein, unknown function          | nucleotide binding                                                       |
| 5    | 855646   | 1.70E-06 | 0.00084               | PF3D7_0520800 | conserved Plasmodium protein, unknown function          | nucleotide binding                                                       |
| 11   | 1765914  | 4.26E-05 | 0.01148               | PF3D7_1144700 | apicoplast import protein Tic20, putative (TIC20)       | null                                                                     |
| 13   | 1913206  | 4.17E-07 | 0.00025               | PF3D7_1347900 | conserved Plasmodium protein, unknown function          | null                                                                     |
| 13   | 1916603  | 1.41E-05 | 0.00507               | PF3D7_1347900 | conserved Plasmodium protein, unknown function          | null                                                                     |
| 13   | 1942524  | 8.11E-05 | 0.01790               | PF3D7_1348400 | conserved Plasmodium membrane protein, unknown function | null                                                                     |
| 13   | 2036738  | 2.84E-05 | 0.00839               | PF3D7_1351000 | phosphatidylinositol transfer protein, putative         | phospholipid binding, phospholipid transporter activity, protein binding |
| 13   | 2045445  | 0.00023  | 0.03854               | PF3D7_1351200 | conserved Plasmodium protein, unknown function          | beta-galactosidase activity, carbohydrate binding, cation binding        |
| 13   | 2373848  | 2.18E-05 | 0.00677               | PF3D7_1359600 | conserved Plasmodium protein, unknown function          | null                                                                     |

### SNPs in ART Sensitivity Cluster

| <b>Chr.</b> | <b>Position</b> | <b><i>P</i> value</b> | <b>FDR<br/>corrected <i>P</i><br/>value</b> | <b>Gene ID</b> |
|-------------|-----------------|-----------------------|---------------------------------------------|----------------|
| 7           | 1152349         | 0.624352898           | 0.999168074                                 | PF3D7_0727100  |
| 7           | 1153700         | 0.052261485           | 0.640491591                                 | PF3D7_0727100  |
| 7           | 1154285         | 0.67345175            | 0.999168074                                 | PF3D7_0727100  |
| 7           | 1154938         | 0.273834272           | 0.948151217                                 | PF3D7_0727100  |
| 9           | 100036          | 0.501048984           | 0.996524854                                 | PF3D7_0902200  |
| 10          | 86696           | 0.545224521           | 0.999168074                                 | PF3D7_1001600  |
| 10          | 87116           | 0.51030273            | 0.996524854                                 | PF3D7_1001600  |
| 10          | 87127           | 0.173511036           | 0.88878064                                  | PF3D7_1001600  |
| 10          | 87154           | 0.712222974           | 0.999168074                                 | PF3D7_1001600  |
| 10          | 87272           | 0.014655856           | 0.394309242                                 | PF3D7_1001600  |
| 10          | 87315           | 0.376018174           | 0.979304191                                 | PF3D7_1001600  |
| 10          | 88346           | 0.776104441           | 0.999168074                                 | PF3D7_1001600  |
| 10          | 88477           | 0.742600739           | 0.999168074                                 | PF3D7_1001600  |
| 11          | 1018820         | 0.084794757           | 0.722945341                                 | PF3D7_1126100  |
| 11          | 1018899         | 0.57273469            | 0.999168074                                 | PF3D7_1126100  |
| 11          | 1018965         | 0.20484751            | 0.915418556                                 | PF3D7_1126100  |
| 11          | 1019067         | 0.652071716           | 0.999168074                                 | PF3D7_1126100  |
| 11          | 1019333         | 0.680729181           | 0.999168074                                 | PF3D7_1126100  |
| 11          | 1019514         | 0.64560366            | 0.999168074                                 | PF3D7_1126100  |
| 11          | 1019560         | 0.013139713           | 0.374410298                                 | PF3D7_1126100  |
| 11          | 1020026         | 0.546917491           | 0.999168074                                 | PF3D7_1126100  |
| 11          | 1020061         | 0.901987242           | 0.999168074                                 | PF3D7_1126100  |
| 11          | 1020134         | 0.76246311            | 0.999168074                                 | PF3D7_1126100  |
| 11          | 1020397         | 0.952300571           | 0.999168074                                 | PF3D7_1126100  |
| 11          | 1020595         | 0.202865615           | 0.912304383                                 | PF3D7_1126100  |
| 11          | 1020630         | 0.875957182           | 0.999168074                                 | PF3D7_1126100  |
| 11          | 1020787         | 0.088593034           | 0.731831185                                 | PF3D7_1126100  |

|    |         |             |             |               |
|----|---------|-------------|-------------|---------------|
| 11 | 1020986 | 0.033312856 | 0.547897799 | PF3D7_1126100 |
| 11 | 1021415 | 0.024414917 | 0.488351648 | PF3D7_1126100 |
| 11 | 1022005 | 0.412305606 | 0.987728487 | PF3D7_1126100 |
| 11 | 1022269 | 0.306718445 | 0.957937512 | PF3D7_1126100 |
| 11 | 1442727 | 0.755881336 | 0.999168074 | PF3D7_1136600 |
| 11 | 1443302 | 0.897765595 | 0.999168074 | PF3D7_1136600 |
| 11 | 1444265 | 0.81416611  | 0.999168074 | PF3D7_1136600 |
| 11 | 1444859 | 0.798597482 | 0.999168074 | PF3D7_1136600 |
| 11 | 1527675 | 0.56373269  | 0.999168074 | PF3D7_1138700 |
| 11 | 1528312 | 0.436448097 | 0.989556    | PF3D7_1138700 |
| 11 | 1528678 | 0.570476365 | 0.999168074 | PF3D7_1138700 |
| 11 | 1529693 | 0.543302386 | 0.999168074 | PF3D7_1138700 |
| 11 | 1529778 | 0.673573926 | 0.999168074 | PF3D7_1138700 |
| 11 | 1529784 | 0.993416376 | 0.999651938 | PF3D7_1138700 |
| 11 | 1529801 | 0.996731805 | 0.999950846 | PF3D7_1138700 |
| 11 | 1530261 | 0.26260381  | 0.946454468 | PF3D7_1138700 |
| 13 | 1724974 | 0.129794441 | 0.822232908 | PF3D7_1343700 |
| 13 | 1725259 | 4.23533E-26 | 7.77E-22    | PF3D7_1343700 |
| 13 | 1725370 | 0.246264559 | 0.937817021 | PF3D7_1343700 |
| 13 | 1725382 | 0.375687046 | 0.979021229 | PF3D7_1343700 |
| 13 | 1725385 | 0.287140984 | 0.954462465 | PF3D7_1343700 |
| 13 | 1725521 | 0.005562035 | 0.248878488 | PF3D7_1343700 |
| 13 | 1726244 | 0.059778538 | 0.668744365 | PF3D7_1343700 |
| 13 | 1726432 | 0.33712619  | 0.967575285 | PF3D7_1343700 |

1 Miotto, O. *et al.* Multiple populations of artemisinin-resistant *Plasmodium falciparum* in Cambodia. *Nature genetics* **45**, 648-655, doi:10.1038/ng.2624 (2013).
